# Supplementary material for: Oscillometry reference values for children and adolescents
Source: PubMed Central journal article supplement — ERJ Open Res. 2024 Dec 16;10(6):00278-2024. doi: 10.1183/23120541.00278-2024 (PMC11655022; doi:10.1183/23120541.00278-2024), 2024-12-16
Supplement: 00278-2024.SUPPLEMENT.pdf [file 00278-2024.SUPPLEMENT.pdf]

## SUPPLEMENT

### Statistical analysis:

Percentile curves and look up tables for oscillometry parameters were created using the lambda, mu, sigma (LMS) method. First, this statistical method estimates the optimal power in the Box-Cox transformation to obtain normality of the transformed data (L), the median (M), and the CoV (S). They are estimated as smooth parameter curves depending on height, due to its strongest correlation with oscillometry parameters (Pearson Correlation coefficients for age = 0.67, weight = 0.59, BMI = 0.36, height = 0.69). To determine L, M and S a vector generalised additive model (VGAM v1.1-9, R-package) was fitted to estimate oscillometry parameters based on height. The degrees of freedom of the L, M, and S curves were chosen by fitting multiple models and selecting the best using the BIC (Bayesian Information Criterion). Extreme outliers (standardised residuals >5) were identified using a linear model and excluded from the LMS-model fitting process to obtain models with a good fit. The fitting approach was controlled by a maximum of n=30 iterations and a positive convergence tolerance (epsilon) of  $1 \cdot e^{-7}$  with effective degrees of freedom for L (1 to 5), M (3 to 10) and S (1 to 5). The parameter curves (L, M and S) of the selected LMS-model were used to construct percentile curves (5<sup>th</sup>, 10<sup>th</sup>, 50<sup>th</sup>, 90<sup>th</sup>, and 95<sup>th</sup>) for the original data. By using the variable-specific parameters L, M and S, individuals' z-scores of each Zrs parameter can be calculated using the following formula:

$$Z = \frac{\left[ \frac{y}{M(t)} \right]^{L(t)} - 1}{L(t)S(t)}$$

In our analysis, we relied on values of Rrs and Xrs as provided by the device in use. Despite the inclusion of an additional method for identifying artifacts such as glottis closure and cough, visual inspection of the data revealed the presence of data points suggesting residual artifacts not excluded by the device. To assess the susceptibility of the derived equations to measurement artifacts, we conducted a sensitivity analysis considering two main factors:

- 1) Susceptibility to Different Levels of Breathing Flows: Air flowing in small lungs, as observed in the pediatric population, may theoretically be more turbulent, potentially making Rrs and Xrs more dependent on breathing flow. To explore the effects of high minute ventilations on derived equations, we excluded data points associated with  $V_e > 18$  L/min from the analysis. The results, shown in Figure S3, demonstrate that such exclusion did not significantly affect the prediction equations.
- 2) Susceptibility to Residual Artifacts Not Filtered by the Devices: Despite the application of artifact detection algorithms embedded in the used device and the use of a threshold on the intrabreath CoV of  $R_{tot}$ , following recently published evidence (*Hantos Z, Wu JKY, Dandurand RJ, Chow CW. Quality control in respiratory oscillometry: reproducibility measures ignoring reactance? ERJ Open Res. 2023;9(3):3-6. doi:10.1183/23120541.00070-2023*), we applied a similar threshold of 1) 15% and 2) 30% to the intrabreath CoV of Xrs using the formula:  $X_{tot\_SD}/|Z_{tot\_MEAN}| \leq 15\%$ . While this approach effectively identified points at the extremities of our distributions, its impact on the predicted normality ranges is minimal across most explored height ranges.

It is crucial to note that our curve is susceptible to border effects at low heights. The limited number of data points with a height of less than 115 cm makes this part of the curve more sensitive to slight changes in the distribution of values. Therefore, careful consideration of these factors is imperative when applying these equations to children smaller than 115 cm.

Figure S1 shows distribution of participants according to age, height and total lung capacity.

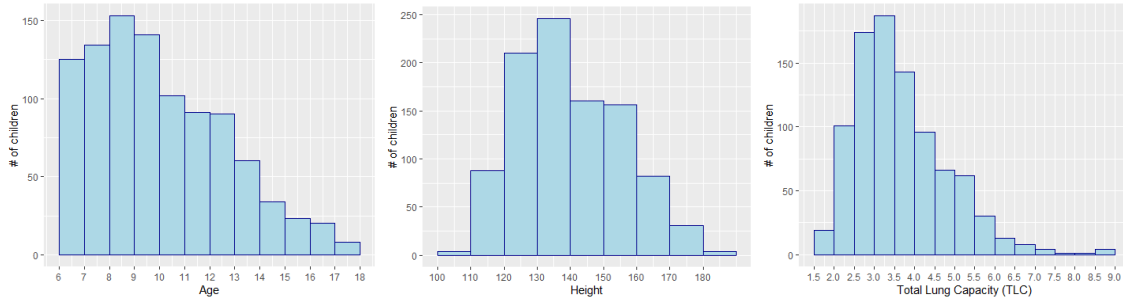

Figure S1: Distribution of participants according to age, height and total lung capacity. Age in years; height in centimetres; TLC in litres.

Table S1 shows the univariate comparisons of X and R parameters between height groups.

|         | 120-130 F           | 120-130 M           | p-value: height 120-130 M vs. F |                     | p-value: height 130-140 M vs. F |           | p-value: height 140-150 M vs. F |                     |    |
|---------|---------------------|---------------------|---------------------------------|---------------------|---------------------------------|-----------|---------------------------------|---------------------|----|
|         |                     |                     | 120-130 F                       | 130-140 F           | 130-140 M                       | 140-150 F | 140-150 M                       |                     |    |
| R8 exp  | 7.8<br>(6.8 to 9.3) | 8.6<br>(7.1 to 9.7) | ns                              | 7.2<br>(6.1 to 8.3) | 6.4<br>(5.7 to 8.2)             | ns        | 5.9<br>(5.1 to 6.9)             | 6.0<br>(4.8 to 7.2) | ns |
| R8 insp | 7.0<br>(6.0 to 7.8) | 6.7<br>(6.0 to 7.7) | ns                              | 6.3<br>(5.4 to 7.0) | 5.6<br>(5.1 to 6.8)             | ns        | 5.2<br>(4.4 to 5.8)             | 5.2<br>(4.3 to 5.8) | ns |
| R8 tot  | 7.5<br>(6.5 to 8.6) | 7.7<br>(6.4 to 8.8) | ns                              | 6.7<br>(5.8 to 7.7) | 6.2<br>(5.5 to 7.5)             | ns        | 5.6<br>(4.8 to 6.4)             | 5.6<br>(4.5 to 6.6) | ns |
| X8 exp  | -2.4 (-3.4 to -1.7) | -2.5 (-3.8 to -2.0) | ns                              | -2.0 (-2.7 to -1.4) | -2.0 (-3.0 to -1.3)             | ns        | -1.5 (-2.0 to -1.0)             | -1.8 (-2.4 to -1.1) | ns |
| X8 insp | -1.9 (-2.5 to -1.4) | -1.6 (-2.2 to -1.2) | 0.028                           | -1.4 (-1.8 to -1.0) | -1.4 (-1.8 to -1.0)             | ns        | -1.0 (-1.5 to -0.8)             | -1.1 (-1.5 to -0.8) | ns |
| X8 tot  | -2.2 (-2.9 to -1.6) | -2.1 (-2.8 to -1.8) | ns                              | -1.7 (-2.3 to -1.3) | -1.6 (-2.4 to -1.3)             | ns        | -1.3 (-1.7 to -0.9)             | -1.4 (-1.9 to -1.0) | ns |

Table S1: Univariate comparisons of X and R parameters between sexes in 10 cm height steps. All numbers are shown as Median (IQR). Abbreviations: R8 insp = inspiratory resistance at 8 Hz; R8 exp = expiratory

resistance at 8 Hz; R8 tot = total resistance at 8 Hz; X8 insp = inspiratory reactance at 8 Hz; X8 exp = expiratory reactance at 8 Hz; X8 tot = total reactance at 8 Hz; M = males, F = females; n = number of participants; SD = standard deviation.

Table S2 shows the univariate comparisons of X and R parameters between TLC groups.

|         | 2-2.5 F                      | 2-2.5 M                    | p-value:TLC 2-2.5 M vs. F |  | 2.5-3 F                      | 2.5-3 M                      | p-value:TLC 2.5-3 M vs. F |  | 3-3.5 F                      | 3-3.5 M                     | p-value:TLC 3-3.5 M vs. F |  | 3.5-4 F                     | 3.5-4 M                    | p-value:TLC 3.5-4 M vs. F |  | 4-4.5 F                        | 4-4.5 M                     | p-value:TLC 4-4.5 M vs. F |  | 4.5-5 F                     | 4.5-5 M                     | p-value:TLC 4.5-5 M vs. F |  | 5-5.5 F                     | 5-5.5 M                     | p-value:TLC 5-5.5 M vs. F |  | 5.5-6 F                     | 5.5-6 M                    | p-value:TLC 5.5-6 M vs. F |  |
|---------|------------------------------|----------------------------|---------------------------|--|------------------------------|------------------------------|---------------------------|--|------------------------------|-----------------------------|---------------------------|--|-----------------------------|----------------------------|---------------------------|--|--------------------------------|-----------------------------|---------------------------|--|-----------------------------|-----------------------------|---------------------------|--|-----------------------------|-----------------------------|---------------------------|--|-----------------------------|----------------------------|---------------------------|--|
| R8 exp  | 8,5<br>(7.3<br>to<br>9.4)    | 8,2<br>(7.2<br>to<br>9.2)  | ns                        |  | 7,6<br>(6.3<br>to<br>8.8)    | 7,6<br>(6.7<br>to<br>9.5)    | ns                        |  | 6,7<br>(5.7<br>to<br>8.2)    | 6,7<br>(5.7<br>to<br>8.2)   | ns                        |  | 5,8<br>(4.9<br>to<br>6.9)   | 5,7<br>(5.0<br>to<br>7.1)  | ns                        |  | 4,9<br>(4.1<br>to<br>5.9)      | 5,0<br>(4.4<br>to<br>6.3)   | ns                        |  | 4,4<br>(3.8<br>to<br>5.4)   | 5,3<br>(3.7<br>to<br>5.8)   | ns                        |  | 3,7<br>(3.2<br>to<br>4.4)   | 4,0<br>(3.6<br>to<br>5.6)   | ns                        |  | 3,6<br>(3.1<br>to<br>4.0)   | 3,7<br>(3.3<br>to<br>4.6)  | ns                        |  |
| R8 insp | 7,3<br>(6.4<br>to<br>8.1)    | 6,9<br>(6.3<br>to<br>7.7)  | ns                        |  | 6,6<br>(5.6<br>to<br>7.4)    | 6,6<br>(5.7<br>to<br>7.7)    | ns                        |  | 5,9<br>(5.1<br>to<br>7.0)    | 5,6<br>(5.1<br>to<br>6.9)   | ns                        |  | 5,0<br>(4.3<br>to<br>5.8)   | 5,1<br>(4.3<br>to<br>5.9)  | ns                        |  | 4,<br>.4<br>(3.7<br>to<br>5.1) | 4,4<br>(4.0<br>to<br>5.5)   | ns                        |  | 3,7<br>(3.3<br>to<br>4.7)   | 4,5<br>(3.4<br>to<br>5.2)   | ns                        |  | 3,6<br>(2.8<br>to<br>4.2)   | 3,6<br>(3.0<br>to<br>4.9)   | ns                        |  | 3,0<br>(2.6<br>to<br>3.4)   | 3,2<br>(2.8<br>to<br>3.6)  | ns                        |  |
| R8 tot  | 7,9<br>(7.0<br>to<br>8.8)    | 7,6<br>(6.6<br>to<br>8.8)  | ns                        |  | 7,1<br>(6.2<br>to<br>8.1)    | 7,3<br>(6.2<br>to<br>8.7)    | ns                        |  | 6,4<br>(5.4<br>to<br>7.6)    | 6,2<br>(5.5<br>to<br>7.6)   | ns                        |  | 5,4<br>(4.7<br>to<br>6.3)   | 5,3<br>(4.6<br>to<br>6.6)  | ns                        |  | 4,6<br>(3.9<br>to<br>5.5)      | 4,8<br>(4.2<br>to<br>6.2)   | ns                        |  | 4,2<br>(3.5<br>to<br>5.1)   | 4,9<br>(3.5<br>to<br>5.5)   | ns                        |  | 3,6<br>(3.1<br>to<br>4.4)   | 3,8<br>(3.4<br>to<br>5.4)   | ns                        |  | 3,4<br>(2.8<br>to<br>3.8)   | 3,5<br>(3.0<br>to<br>4.3)  | ns                        |  |
| X8 exp  | -2,8<br>(-3,6<br>to<br>-1,9) | -3,6<br>(4,3<br>to<br>2,9) | 0,0<br>16                 |  | -2,1<br>(-3,1<br>to<br>-1,7) | -2,4<br>(3,5<br>to<br>1,8)   | ns                        |  | -1,8<br>(-2,5<br>to<br>-1,3) | -1,9<br>(2,6<br>to<br>-1,3) | ns                        |  | -1,3<br>(-1,9<br>to<br>0,9) | -1,5<br>(2,4<br>to<br>1,2) | 0,0<br>08                 |  | -1,0<br>(-1,6<br>to<br>0,6)    | -1,3<br>(1,9<br>to<br>0,8)  | ns                        |  | -0,8<br>(-1,1<br>to<br>0,6) | -1,0<br>(1,3<br>to<br>0,8)  | 0,0<br>50                 |  | -0,6<br>(-0,8<br>to<br>0,4) | -1,0<br>(2,3<br>to<br>0,6)  | 0,0<br>33                 |  | -0,6<br>(-0,8<br>to<br>0,4) | -0,7<br>(0,8<br>to<br>0,6) | ns                        |  |
| X8 insp | -2,1<br>(-2,6<br>to<br>-1,6) | -1,9<br>(2,6<br>to<br>1,6) | ns                        |  | -1,8<br>(-2,2<br>to<br>-1,3) | -1,5<br>(-2,0<br>to<br>-1,2) | ns                        |  | -1,3<br>(-1,7<br>to<br>0,9)  | -1,4<br>(1,6<br>to<br>1,0)  | ns                        |  | -1,1<br>(-1,4<br>to<br>0,8) | -1,2<br>(1,6<br>to<br>0,8) | ns                        |  | -0,7<br>(-1,0<br>to<br>0,5)    | -0,8<br>(-1,1<br>to<br>0,6) | ns                        |  | -0,5<br>(-0,9<br>to<br>0,3) | -0,8<br>(-1,0<br>to<br>0,4) | ns                        |  | -0,6<br>(-0,8<br>to<br>0,4) | -0,6<br>(-1,2<br>to<br>0,4) | ns                        |  | -0,5<br>(-0,6<br>to<br>0,3) | -0,5<br>(0,6<br>to<br>0,4) | ns                        |  |
| X8 tot  | -2,5<br>(-3,2<br>to<br>-1,9) | -2,8<br>(3,5<br>to<br>2,2) | ns                        |  | -1,9<br>(-2,8<br>to<br>-1,5) | -2,0<br>(2,8<br>to<br>1,7)   | ns                        |  | -1,5<br>(-2,2<br>to<br>-1,2) | -1,7<br>(2,1<br>to<br>-1,2) | ns                        |  | -1,2<br>(-1,6<br>to<br>0,9) | -1,4<br>(1,9<br>to<br>1,1) | 0,0<br>25                 |  | -0,8<br>(-1,3<br>to<br>0,6)    | -1,0<br>(1,6<br>to<br>0,8)  | ns                        |  | -0,7<br>(-0,9<br>to<br>0,5) | -0,9<br>(1,1<br>to<br>0,7)  | 0,0<br>47                 |  | -0,6<br>(-0,8<br>to<br>0,4) | -0,7<br>(1,7<br>to<br>0,6)  | 0,0<br>38                 |  | -0,6<br>(-0,8<br>to<br>0,4) | -0,6<br>(0,7<br>to<br>0,5) | ns                        |  |

Table S2: Univariate comparisons of X and R parameters between sexes in 0.5 L steps. All numbers are shown as Median (IQR). Abbreviations: R8 insp = inspiratory resistance at 8 Hz; R8 exp = expiratory resistance at 8 Hz; R8 tot = total resistance at 8 Hz; X8 insp = inspiratory reactance at 8 Hz; X8 exp = expiratory reactance at 8 Hz; X8 tot = total reactance at 8 Hz; TLC = total lung capacity; M = males, F = females; n = number of participants; SD = standard deviation.

Table S3 shows the created reference values for male children and adolescents for the parameter Rexp at 8 Hz in the form of a look up table. In all the following tables, the 10<sup>th</sup>, 50<sup>th</sup> and 90<sup>th</sup> percentiles are shown in addition to the 5<sup>th</sup> and 95<sup>th</sup> percentiles usually used as lower limit of normal (LLN) and upper limit of normal (ULN). The L, M and S values are also shown, with which individual z-scores can be calculated.

| Height | lambda | mu     | sigma | 5%    | 10%   | 50%    | 90%    | 95%    |
|--------|--------|--------|-------|-------|-------|--------|--------|--------|
| 101    | 0,507  | 10,335 | 1,917 | 7,984 | 8,477 | 10,335 | 12,374 | 12,985 |
| 102    | 0,481  | 10,236 | 1,902 | 7,882 | 8,375 | 10,236 | 12,291 | 12,909 |
| 103    | 0,455  | 10,136 | 1,887 | 7,781 | 8,272 | 10,136 | 12,209 | 12,834 |
| 104    | 0,429  | 10,037 | 1,873 | 7,680 | 8,170 | 10,037 | 12,126 | 12,760 |
| 105    | 0,404  | 9,938  | 1,858 | 7,580 | 8,068 | 9,938  | 12,044 | 12,685 |
| 106    | 0,378  | 9,839  | 1,844 | 7,480 | 7,967 | 9,839  | 11,962 | 12,611 |
| 107    | 0,352  | 9,739  | 1,829 | 7,381 | 7,866 | 9,739  | 11,880 | 12,538 |
| 108    | 0,326  | 9,640  | 1,814 | 7,282 | 7,765 | 9,640  | 11,798 | 12,465 |
| 109    | 0,300  | 9,541  | 1,800 | 7,184 | 7,665 | 9,541  | 11,717 | 12,392 |
| 110    | 0,274  | 9,441  | 1,785 | 7,086 | 7,565 | 9,441  | 11,635 | 12,319 |
| 111    | 0,248  | 9,342  | 1,770 | 6,988 | 7,465 | 9,342  | 11,554 | 12,247 |
| 112    | 0,222  | 9,243  | 1,756 | 6,891 | 7,365 | 9,243  | 11,473 | 12,175 |
| 113    | 0,196  | 9,143  | 1,741 | 6,795 | 7,266 | 9,143  | 11,392 | 12,104 |
| 114    | 0,170  | 9,044  | 1,727 | 6,699 | 7,168 | 9,044  | 11,311 | 12,033 |
| 115    | 0,145  | 8,945  | 1,712 | 6,603 | 7,069 | 8,945  | 11,230 | 11,962 |
| 116    | 0,119  | 8,845  | 1,697 | 6,508 | 6,971 | 8,845  | 11,149 | 11,892 |
| 117    | 0,095  | 8,746  | 1,683 | 6,413 | 6,873 | 8,746  | 11,068 | 11,821 |
| 118    | 0,072  | 8,646  | 1,668 | 6,318 | 6,776 | 8,646  | 10,987 | 11,750 |
| 119    | 0,050  | 8,546  | 1,654 | 6,224 | 6,678 | 8,546  | 10,904 | 11,678 |
| 120    | 0,029  | 8,446  | 1,640 | 6,129 | 6,581 | 8,446  | 10,821 | 11,605 |
| 121    | 0,009  | 8,346  | 1,626 | 6,035 | 6,484 | 8,346  | 10,737 | 11,531 |
| 122    | -0,010 | 8,245  | 1,612 | 5,941 | 6,386 | 8,245  | 10,651 | 11,455 |
| 123    | -0,029 | 8,143  | 1,598 | 5,847 | 6,289 | 8,143  | 10,564 | 11,377 |
| 124    | -0,045 | 8,040  | 1,584 | 5,752 | 6,191 | 8,040  | 10,475 | 11,297 |
| 125    | -0,059 | 7,937  | 1,570 | 5,657 | 6,093 | 7,937  | 10,383 | 11,213 |
| 126    | -0,069 | 7,833  | 1,557 | 5,561 | 5,994 | 7,833  | 10,288 | 11,125 |
| 127    | -0,072 | 7,728  | 1,544 | 5,463 | 5,894 | 7,728  | 10,189 | 11,030 |
| 128    | -0,068 | 7,624  | 1,531 | 5,364 | 5,793 | 7,624  | 10,086 | 10,929 |
| 129    | -0,056 | 7,519  | 1,518 | 5,262 | 5,690 | 7,519  | 9,978  | 10,821 |
| 130    | -0,033 | 7,414  | 1,506 | 5,159 | 5,587 | 7,414  | 9,866  | 10,704 |
| 131    | -0,001 | 7,310  | 1,493 | 5,053 | 5,482 | 7,310  | 9,749  | 10,578 |
| 132    | 0,041  | 7,207  | 1,482 | 4,945 | 5,377 | 7,207  | 9,628  | 10,445 |
| 133    | 0,091  | 7,105  | 1,470 | 4,835 | 5,270 | 7,105  | 9,503  | 10,305 |
| 134    | 0,150  | 7,003  | 1,459 | 4,723 | 5,163 | 7,003  | 9,374  | 10,159 |
| 135    | 0,215  | 6,902  | 1,448 | 4,609 | 5,055 | 6,902  | 9,242  | 10,007 |
| 136    | 0,284  | 6,802  | 1,437 | 4,495 | 4,947 | 6,802  | 9,109  | 9,853  |
| 137    | 0,355  | 6,702  | 1,427 | 4,381 | 4,839 | 6,702  | 8,973  | 9,697  |
| 138    | 0,423  | 6,602  | 1,418 | 4,267 | 4,733 | 6,602  | 8,837  | 9,540  |

|     |        |       |       |       |       |       |       |       |
|-----|--------|-------|-------|-------|-------|-------|-------|-------|
| 139 | 0,485  | 6,501 | 1,409 | 4,157 | 4,629 | 6,501 | 8,702 | 9,386 |
| 140 | 0,537  | 6,401 | 1,401 | 4,052 | 4,528 | 6,401 | 8,568 | 9,236 |
| 141 | 0,573  | 6,300 | 1,393 | 3,956 | 4,434 | 6,300 | 8,438 | 9,093 |
| 142 | 0,590  | 6,199 | 1,386 | 3,870 | 4,346 | 6,199 | 8,313 | 8,957 |
| 143 | 0,589  | 6,097 | 1,380 | 3,794 | 4,264 | 6,097 | 8,191 | 8,830 |
| 144 | 0,571  | 5,996 | 1,374 | 3,728 | 4,189 | 5,996 | 8,074 | 8,710 |
| 145 | 0,539  | 5,894 | 1,369 | 3,669 | 4,119 | 5,894 | 7,959 | 8,595 |
| 146 | 0,497  | 5,793 | 1,365 | 3,616 | 4,053 | 5,793 | 7,845 | 8,484 |
| 147 | 0,446  | 5,691 | 1,361 | 3,567 | 3,989 | 5,691 | 7,734 | 8,376 |
| 148 | 0,388  | 5,590 | 1,358 | 3,521 | 3,928 | 5,590 | 7,623 | 8,271 |
| 149 | 0,325  | 5,489 | 1,355 | 3,477 | 3,869 | 5,489 | 7,513 | 8,167 |
| 150 | 0,259  | 5,388 | 1,353 | 3,434 | 3,811 | 5,388 | 7,404 | 8,065 |
| 151 | 0,191  | 5,288 | 1,352 | 3,392 | 3,754 | 5,288 | 7,294 | 7,962 |
| 152 | 0,125  | 5,189 | 1,351 | 3,349 | 3,697 | 5,189 | 7,183 | 7,858 |
| 153 | 0,063  | 5,090 | 1,351 | 3,305 | 3,640 | 5,090 | 7,070 | 7,751 |
| 154 | 0,007  | 4,993 | 1,351 | 3,260 | 3,582 | 4,993 | 6,955 | 7,639 |
| 155 | -0,039 | 4,898 | 1,353 | 3,212 | 3,524 | 4,898 | 6,836 | 7,520 |
| 156 | -0,073 | 4,803 | 1,355 | 3,162 | 3,464 | 4,803 | 6,712 | 7,392 |
| 157 | -0,093 | 4,709 | 1,357 | 3,109 | 3,403 | 4,709 | 6,583 | 7,253 |
| 158 | -0,100 | 4,616 | 1,360 | 3,053 | 3,340 | 4,616 | 6,448 | 7,104 |
| 159 | -0,095 | 4,524 | 1,364 | 2,995 | 3,276 | 4,524 | 6,310 | 6,948 |
| 160 | -0,082 | 4,432 | 1,368 | 2,936 | 3,212 | 4,432 | 6,168 | 6,786 |
| 161 | -0,061 | 4,341 | 1,373 | 2,876 | 3,147 | 4,341 | 6,025 | 6,620 |
| 162 | -0,034 | 4,250 | 1,378 | 2,816 | 3,082 | 4,250 | 5,881 | 6,453 |
| 163 | -0,004 | 4,160 | 1,383 | 2,755 | 3,018 | 4,160 | 5,738 | 6,286 |
| 164 | 0,028  | 4,071 | 1,389 | 2,696 | 2,954 | 4,071 | 5,596 | 6,120 |
| 165 | 0,061  | 3,983 | 1,395 | 2,636 | 2,890 | 3,983 | 5,455 | 5,957 |
| 166 | 0,095  | 3,895 | 1,402 | 2,577 | 2,827 | 3,895 | 5,315 | 5,795 |
| 167 | 0,127  | 3,807 | 1,408 | 2,519 | 2,765 | 3,807 | 5,177 | 5,636 |
| 168 | 0,159  | 3,720 | 1,415 | 2,462 | 2,703 | 3,720 | 5,041 | 5,481 |
| 169 | 0,189  | 3,634 | 1,422 | 2,405 | 2,642 | 3,634 | 4,908 | 5,328 |
| 170 | 0,217  | 3,548 | 1,429 | 2,350 | 2,582 | 3,548 | 4,776 | 5,179 |
| 171 | 0,245  | 3,463 | 1,435 | 2,295 | 2,522 | 3,463 | 4,647 | 5,033 |
| 172 | 0,273  | 3,379 | 1,442 | 2,240 | 2,463 | 3,379 | 4,520 | 4,889 |
| 173 | 0,303  | 3,295 | 1,449 | 2,186 | 2,404 | 3,295 | 4,395 | 4,748 |
| 174 | 0,334  | 3,212 | 1,456 | 2,131 | 2,345 | 3,212 | 4,271 | 4,608 |
| 175 | 0,366  | 3,129 | 1,463 | 2,077 | 2,286 | 3,129 | 4,147 | 4,469 |
| 176 | 0,400  | 3,047 | 1,470 | 2,022 | 2,227 | 3,047 | 4,025 | 4,333 |
| 177 | 0,436  | 2,964 | 1,477 | 1,967 | 2,168 | 2,964 | 3,904 | 4,197 |
| 178 | 0,471  | 2,882 | 1,484 | 1,913 | 2,109 | 2,882 | 3,784 | 4,064 |
| 179 | 0,508  | 2,800 | 1,491 | 1,858 | 2,050 | 2,800 | 3,666 | 3,932 |
| 180 | 0,544  | 2,718 | 1,498 | 1,803 | 1,991 | 2,718 | 3,548 | 3,801 |
| 181 | 0,581  | 2,637 | 1,505 | 1,749 | 1,932 | 2,637 | 3,431 | 3,672 |
| 182 | 0,618  | 2,555 | 1,511 | 1,694 | 1,873 | 2,555 | 3,316 | 3,545 |
| 183 | 0,654  | 2,473 | 1,518 | 1,640 | 1,814 | 2,473 | 3,201 | 3,418 |

Table S3: Look up table for Rexp at 8 Hz for male children and adolescents. Height in cm; 5<sup>th</sup>, 10<sup>th</sup>, 50<sup>th</sup>, 90<sup>th</sup> and 95<sup>th</sup> percentile.

Table S4 shows the created reference values for female children and adolescents for the parameter Rexp at 8 Hz in the form of a look up table.

| Height | lambda | mu     | sigma | 5%    | 10%   | 50%    | 90%    | 95%    |
|--------|--------|--------|-------|-------|-------|--------|--------|--------|
| 101    | 0,848  | 10,129 | 1,861 | 7,592 | 8,143 | 10,129 | 12,177 | 12,768 |
| 102    | 0,836  | 10,034 | 1,851 | 7,500 | 8,049 | 10,034 | 12,087 | 12,680 |
| 103    | 0,825  | 9,940  | 1,840 | 7,407 | 7,955 | 9,940  | 11,997 | 12,592 |
| 104    | 0,813  | 9,846  | 1,830 | 7,315 | 7,862 | 9,846  | 11,908 | 12,505 |
| 105    | 0,802  | 9,752  | 1,819 | 7,223 | 7,769 | 9,752  | 11,820 | 12,420 |
| 106    | 0,791  | 9,659  | 1,808 | 7,131 | 7,675 | 9,659  | 11,733 | 12,336 |
| 107    | 0,779  | 9,567  | 1,796 | 7,038 | 7,582 | 9,567  | 11,648 | 12,254 |
| 108    | 0,768  | 9,475  | 1,784 | 6,945 | 7,488 | 9,475  | 11,565 | 12,175 |
| 109    | 0,756  | 9,385  | 1,771 | 6,851 | 7,394 | 9,385  | 11,485 | 12,098 |
| 110    | 0,745  | 9,295  | 1,757 | 6,756 | 7,299 | 9,295  | 11,407 | 12,026 |
| 111    | 0,733  | 9,206  | 1,742 | 6,660 | 7,203 | 9,206  | 11,333 | 11,957 |
| 112    | 0,722  | 9,118  | 1,726 | 6,563 | 7,107 | 9,118  | 11,261 | 11,891 |
| 113    | 0,710  | 9,031  | 1,710 | 6,464 | 7,009 | 9,031  | 11,193 | 11,830 |
| 114    | 0,699  | 8,945  | 1,692 | 6,365 | 6,912 | 8,945  | 11,128 | 11,772 |
| 115    | 0,687  | 8,859  | 1,674 | 6,265 | 6,814 | 8,859  | 11,065 | 11,718 |
| 116    | 0,676  | 8,775  | 1,656 | 6,164 | 6,715 | 8,775  | 11,006 | 11,667 |
| 117    | 0,664  | 8,691  | 1,636 | 6,063 | 6,616 | 8,691  | 10,948 | 11,619 |
| 118    | 0,653  | 8,607  | 1,617 | 5,961 | 6,517 | 8,607  | 10,892 | 11,573 |
| 119    | 0,642  | 8,524  | 1,597 | 5,861 | 6,418 | 8,524  | 10,836 | 11,527 |
| 120    | 0,630  | 8,441  | 1,578 | 5,762 | 6,321 | 8,441  | 10,780 | 11,481 |
| 121    | 0,619  | 8,358  | 1,560 | 5,665 | 6,225 | 8,358  | 10,722 | 11,432 |
| 122    | 0,607  | 8,274  | 1,542 | 5,569 | 6,130 | 8,274  | 10,663 | 11,383 |
| 123    | 0,596  | 8,191  | 1,524 | 5,474 | 6,036 | 8,191  | 10,605 | 11,334 |
| 124    | 0,584  | 8,108  | 1,506 | 5,379 | 5,941 | 8,108  | 10,547 | 11,286 |
| 125    | 0,573  | 8,023  | 1,487 | 5,283 | 5,846 | 8,023  | 10,489 | 11,238 |
| 126    | 0,561  | 7,938  | 1,469 | 5,187 | 5,751 | 7,938  | 10,428 | 11,188 |
| 127    | 0,550  | 7,851  | 1,452 | 5,095 | 5,657 | 7,851  | 10,363 | 11,131 |
| 128    | 0,538  | 7,762  | 1,439 | 5,008 | 5,569 | 7,762  | 10,286 | 11,061 |
| 129    | 0,527  | 7,670  | 1,429 | 4,932 | 5,487 | 7,670  | 10,195 | 10,972 |
| 130    | 0,515  | 7,576  | 1,424 | 4,866 | 5,415 | 7,576  | 10,087 | 10,861 |
| 131    | 0,504  | 7,479  | 1,425 | 4,810 | 5,350 | 7,479  | 9,961  | 10,729 |
| 132    | 0,492  | 7,379  | 1,430 | 4,763 | 5,291 | 7,379  | 9,820  | 10,576 |
| 133    | 0,481  | 7,276  | 1,438 | 4,722 | 5,237 | 7,276  | 9,664  | 10,405 |
| 134    | 0,470  | 7,169  | 1,449 | 4,682 | 5,183 | 7,169  | 9,499  | 10,223 |
| 135    | 0,458  | 7,058  | 1,460 | 4,639 | 5,126 | 7,058  | 9,329  | 10,035 |
| 136    | 0,447  | 6,943  | 1,471 | 4,590 | 5,063 | 6,943  | 9,155  | 9,845  |

|     |        |       |       |       |       |       |       |       |
|-----|--------|-------|-------|-------|-------|-------|-------|-------|
| 137 | 0,435  | 6,824 | 1,479 | 4,534 | 4,994 | 6,824 | 8,982 | 9,656 |
| 138 | 0,424  | 6,702 | 1,486 | 4,469 | 4,918 | 6,702 | 8,811 | 9,470 |
| 139 | 0,412  | 6,576 | 1,489 | 4,396 | 4,833 | 6,576 | 8,643 | 9,289 |
| 140 | 0,401  | 6,448 | 1,488 | 4,313 | 4,741 | 6,448 | 8,478 | 9,114 |
| 141 | 0,389  | 6,316 | 1,485 | 4,223 | 4,641 | 6,316 | 8,316 | 8,945 |
| 142 | 0,378  | 6,183 | 1,478 | 4,126 | 4,536 | 6,183 | 8,158 | 8,781 |
| 143 | 0,366  | 6,048 | 1,469 | 4,025 | 4,427 | 6,048 | 8,003 | 8,621 |
| 144 | 0,355  | 5,914 | 1,459 | 3,922 | 4,317 | 5,914 | 7,850 | 8,464 |
| 145 | 0,343  | 5,782 | 1,448 | 3,819 | 4,207 | 5,782 | 7,700 | 8,311 |
| 146 | 0,332  | 5,651 | 1,437 | 3,717 | 4,099 | 5,651 | 7,553 | 8,161 |
| 147 | 0,321  | 5,521 | 1,425 | 3,617 | 3,991 | 5,521 | 7,408 | 8,013 |
| 148 | 0,309  | 5,393 | 1,413 | 3,517 | 3,885 | 5,393 | 7,265 | 7,868 |
| 149 | 0,298  | 5,267 | 1,401 | 3,420 | 3,780 | 5,267 | 7,124 | 7,724 |
| 150 | 0,286  | 5,144 | 1,389 | 3,325 | 3,679 | 5,144 | 6,983 | 7,580 |
| 151 | 0,275  | 5,022 | 1,379 | 3,235 | 3,582 | 5,022 | 6,842 | 7,435 |
| 152 | 0,263  | 4,904 | 1,370 | 3,150 | 3,490 | 4,904 | 6,702 | 7,289 |
| 153 | 0,252  | 4,790 | 1,363 | 3,070 | 3,402 | 4,790 | 6,563 | 7,145 |
| 154 | 0,240  | 4,679 | 1,357 | 2,994 | 3,318 | 4,679 | 6,428 | 7,003 |
| 155 | 0,229  | 4,574 | 1,352 | 2,923 | 3,240 | 4,574 | 6,296 | 6,866 |
| 156 | 0,217  | 4,473 | 1,347 | 2,856 | 3,166 | 4,473 | 6,170 | 6,732 |
| 157 | 0,206  | 4,378 | 1,344 | 2,794 | 3,097 | 4,378 | 6,048 | 6,603 |
| 158 | 0,194  | 4,288 | 1,343 | 2,738 | 3,034 | 4,288 | 5,929 | 6,476 |
| 159 | 0,183  | 4,202 | 1,344 | 2,688 | 2,976 | 4,202 | 5,813 | 6,351 |
| 160 | 0,171  | 4,122 | 1,347 | 2,643 | 2,924 | 4,122 | 5,699 | 6,228 |
| 161 | 0,160  | 4,047 | 1,353 | 2,605 | 2,879 | 4,047 | 5,589 | 6,106 |
| 162 | 0,149  | 3,977 | 1,362 | 2,573 | 2,840 | 3,977 | 5,479 | 5,984 |
| 163 | 0,137  | 3,910 | 1,374 | 2,547 | 2,806 | 3,910 | 5,371 | 5,862 |
| 164 | 0,126  | 3,847 | 1,389 | 2,526 | 2,777 | 3,847 | 5,262 | 5,737 |
| 165 | 0,114  | 3,785 | 1,408 | 2,507 | 2,751 | 3,785 | 5,150 | 5,609 |
| 166 | 0,103  | 3,724 | 1,430 | 2,492 | 2,727 | 3,724 | 5,037 | 5,478 |
| 167 | 0,091  | 3,663 | 1,454 | 2,477 | 2,704 | 3,663 | 4,922 | 5,344 |
| 168 | 0,080  | 3,602 | 1,480 | 2,464 | 2,682 | 3,602 | 4,806 | 5,209 |
| 169 | 0,068  | 3,542 | 1,509 | 2,450 | 2,660 | 3,542 | 4,689 | 5,073 |
| 170 | 0,057  | 3,481 | 1,540 | 2,437 | 2,638 | 3,481 | 4,572 | 4,936 |
| 171 | 0,045  | 3,419 | 1,572 | 2,423 | 2,616 | 3,419 | 4,454 | 4,798 |
| 172 | 0,034  | 3,356 | 1,606 | 2,408 | 2,592 | 3,356 | 4,336 | 4,660 |
| 173 | 0,022  | 3,292 | 1,641 | 2,391 | 2,567 | 3,292 | 4,217 | 4,523 |
| 174 | 0,011  | 3,228 | 1,678 | 2,373 | 2,540 | 3,228 | 4,099 | 4,386 |
| 175 | -0,001 | 3,162 | 1,716 | 2,353 | 2,512 | 3,162 | 3,982 | 4,251 |
| 176 | -0,012 | 3,097 | 1,755 | 2,331 | 2,482 | 3,097 | 3,866 | 4,118 |
| 177 | -0,023 | 3,031 | 1,794 | 2,308 | 2,451 | 3,031 | 3,753 | 3,988 |
| 178 | -0,035 | 2,966 | 1,834 | 2,283 | 2,419 | 2,966 | 3,642 | 3,862 |
| 179 | -0,046 | 2,901 | 1,875 | 2,257 | 2,385 | 2,901 | 3,534 | 3,738 |
| 180 | -0,058 | 2,835 | 1,916 | 2,229 | 2,350 | 2,835 | 3,428 | 3,618 |
| 181 | -0,069 | 2,770 | 1,957 | 2,200 | 2,314 | 2,770 | 3,324 | 3,502 |
| 182 | -0,081 | 2,705 | 1,998 | 2,168 | 2,276 | 2,705 | 3,222 | 3,387 |



|            |        |       |       |       |       |       |       |       |
|------------|--------|-------|-------|-------|-------|-------|-------|-------|
| <b>183</b> | -0,092 | 2,639 | 2,039 | 2,135 | 2,237 | 2,639 | 3,122 | 3,276 |
|------------|--------|-------|-------|-------|-------|-------|-------|-------|

Table S4: Look up table for Rexp at 8 Hz for female children and adolescents. Height in cm; 5<sup>th</sup>, 10<sup>th</sup>, 50<sup>th</sup>, 90<sup>th</sup> and 95<sup>th</sup> percentile.

Table S5 shows the created reference values for male children and adolescents for the parameter Rinsp at 8 Hz in the form of a look up table.

| Height     | lambda | mu    | sigma | 5%    | 10%   | 50%   | 90%   | 95%   |
|------------|--------|-------|-------|-------|-------|-------|-------|-------|
| <b>101</b> | -2,484 | 6,476 | 2,042 | 5,457 | 5,634 | 6,476 | 8,024 | 8,775 |
| <b>102</b> | -2,404 | 6,505 | 2,029 | 5,465 | 5,647 | 6,505 | 8,074 | 8,828 |
| <b>103</b> | -2,324 | 6,535 | 2,015 | 5,474 | 5,659 | 6,535 | 8,124 | 8,880 |
| <b>104</b> | -2,245 | 6,564 | 2,001 | 5,481 | 5,671 | 6,564 | 8,174 | 8,931 |
| <b>105</b> | -2,165 | 6,594 | 1,988 | 5,488 | 5,682 | 6,594 | 8,224 | 8,983 |
| <b>106</b> | -2,085 | 6,624 | 1,974 | 5,495 | 5,693 | 6,624 | 8,274 | 9,034 |
| <b>107</b> | -2,006 | 6,653 | 1,960 | 5,501 | 5,704 | 6,653 | 8,324 | 9,085 |
| <b>108</b> | -1,926 | 6,683 | 1,947 | 5,506 | 5,713 | 6,683 | 8,374 | 9,135 |
| <b>109</b> | -1,846 | 6,713 | 1,933 | 5,510 | 5,723 | 6,713 | 8,424 | 9,185 |
| <b>110</b> | -1,767 | 6,742 | 1,919 | 5,514 | 5,732 | 6,742 | 8,473 | 9,235 |
| <b>111</b> | -1,687 | 6,772 | 1,905 | 5,518 | 5,740 | 6,772 | 8,523 | 9,284 |
| <b>112</b> | -1,607 | 6,801 | 1,892 | 5,520 | 5,748 | 6,801 | 8,572 | 9,333 |
| <b>113</b> | -1,528 | 6,831 | 1,878 | 5,521 | 5,755 | 6,831 | 8,621 | 9,381 |
| <b>114</b> | -1,448 | 6,860 | 1,864 | 5,522 | 5,761 | 6,860 | 8,670 | 9,429 |
| <b>115</b> | -1,368 | 6,889 | 1,851 | 5,521 | 5,767 | 6,889 | 8,719 | 9,477 |
| <b>116</b> | -1,288 | 6,918 | 1,837 | 5,520 | 5,771 | 6,918 | 8,766 | 9,523 |
| <b>117</b> | -1,208 | 6,945 | 1,824 | 5,517 | 5,774 | 6,945 | 8,813 | 9,567 |
| <b>118</b> | -1,127 | 6,970 | 1,810 | 5,510 | 5,774 | 6,970 | 8,854 | 9,606 |
| <b>119</b> | -1,046 | 6,987 | 1,796 | 5,496 | 5,767 | 6,987 | 8,887 | 9,634 |
| <b>120</b> | -0,963 | 6,995 | 1,783 | 5,474 | 5,751 | 6,995 | 8,905 | 9,648 |
| <b>121</b> | -0,880 | 6,989 | 1,770 | 5,440 | 5,723 | 6,989 | 8,907 | 9,642 |
| <b>122</b> | -0,796 | 6,967 | 1,756 | 5,393 | 5,682 | 6,967 | 8,887 | 9,613 |
| <b>123</b> | -0,709 | 6,925 | 1,743 | 5,330 | 5,624 | 6,925 | 8,841 | 9,555 |
| <b>124</b> | -0,622 | 6,861 | 1,730 | 5,248 | 5,548 | 6,861 | 8,765 | 9,465 |
| <b>125</b> | -0,532 | 6,775 | 1,717 | 5,149 | 5,453 | 6,775 | 8,660 | 9,343 |
| <b>126</b> | -0,442 | 6,670 | 1,704 | 5,036 | 5,343 | 6,670 | 8,531 | 9,194 |
| <b>127</b> | -0,351 | 6,554 | 1,692 | 4,914 | 5,224 | 6,554 | 8,385 | 9,029 |
| <b>128</b> | -0,259 | 6,434 | 1,679 | 4,789 | 5,102 | 6,434 | 8,235 | 8,858 |
| <b>129</b> | -0,167 | 6,317 | 1,667 | 4,666 | 4,982 | 6,317 | 8,087 | 8,690 |
| <b>130</b> | -0,075 | 6,207 | 1,654 | 4,549 | 4,869 | 6,207 | 7,949 | 8,533 |
| <b>131</b> | 0,016  | 6,110 | 1,643 | 4,441 | 4,766 | 6,110 | 7,826 | 8,393 |
| <b>132</b> | 0,105  | 6,029 | 1,631 | 4,345 | 4,675 | 6,029 | 7,723 | 8,275 |
| <b>133</b> | 0,192  | 5,965 | 1,619 | 4,261 | 4,598 | 5,965 | 7,642 | 8,181 |
| <b>134</b> | 0,276  | 5,915 | 1,608 | 4,188 | 4,533 | 5,915 | 7,580 | 8,108 |
| <b>135</b> | 0,356  | 5,876 | 1,597 | 4,122 | 4,475 | 5,876 | 7,531 | 8,049 |

|            |       |       |       |       |       |       |       |       |
|------------|-------|-------|-------|-------|-------|-------|-------|-------|
| <b>136</b> | 0,430 | 5,838 | 1,586 | 4,059 | 4,420 | 5,838 | 7,485 | 7,995 |
| <b>137</b> | 0,498 | 5,796 | 1,576 | 3,993 | 4,362 | 5,796 | 7,433 | 7,935 |
| <b>138</b> | 0,557 | 5,741 | 1,566 | 3,921 | 4,297 | 5,741 | 7,367 | 7,861 |
| <b>139</b> | 0,607 | 5,673 | 1,557 | 3,844 | 4,224 | 5,673 | 7,285 | 7,770 |
| <b>140</b> | 0,646 | 5,592 | 1,548 | 3,762 | 4,144 | 5,592 | 7,188 | 7,665 |
| <b>141</b> | 0,671 | 5,504 | 1,540 | 3,680 | 4,062 | 5,504 | 7,083 | 7,554 |
| <b>142</b> | 0,682 | 5,415 | 1,532 | 3,604 | 3,983 | 5,415 | 6,978 | 7,444 |
| <b>143</b> | 0,679 | 5,328 | 1,525 | 3,535 | 3,910 | 5,328 | 6,879 | 7,342 |
| <b>144</b> | 0,665 | 5,242 | 1,518 | 3,472 | 3,841 | 5,242 | 6,782 | 7,243 |
| <b>145</b> | 0,641 | 5,155 | 1,512 | 3,411 | 3,774 | 5,155 | 6,684 | 7,143 |
| <b>146</b> | 0,609 | 5,063 | 1,506 | 3,351 | 3,706 | 5,063 | 6,581 | 7,040 |
| <b>147</b> | 0,572 | 4,969 | 1,501 | 3,292 | 3,637 | 4,969 | 6,475 | 6,933 |
| <b>148</b> | 0,531 | 4,873 | 1,496 | 3,234 | 3,569 | 4,873 | 6,366 | 6,823 |
| <b>149</b> | 0,488 | 4,778 | 1,492 | 3,177 | 3,502 | 4,778 | 6,257 | 6,714 |
| <b>150</b> | 0,444 | 4,679 | 1,488 | 3,118 | 3,433 | 4,679 | 6,143 | 6,599 |
| <b>151</b> | 0,402 | 4,574 | 1,485 | 3,055 | 3,359 | 4,574 | 6,019 | 6,472 |
| <b>152</b> | 0,363 | 4,469 | 1,483 | 2,992 | 3,286 | 4,469 | 5,893 | 6,344 |
| <b>153</b> | 0,328 | 4,375 | 1,481 | 2,935 | 3,220 | 4,375 | 5,779 | 6,226 |
| <b>154</b> | 0,299 | 4,294 | 1,480 | 2,887 | 3,165 | 4,294 | 5,681 | 6,124 |
| <b>155</b> | 0,277 | 4,227 | 1,479 | 2,846 | 3,118 | 4,227 | 5,597 | 6,038 |
| <b>156</b> | 0,262 | 4,169 | 1,479 | 2,811 | 3,077 | 4,169 | 5,524 | 5,961 |
| <b>157</b> | 0,256 | 4,117 | 1,480 | 2,777 | 3,040 | 4,117 | 5,455 | 5,887 |
| <b>158</b> | 0,258 | 4,066 | 1,481 | 2,744 | 3,003 | 4,066 | 5,385 | 5,811 |
| <b>159</b> | 0,269 | 4,013 | 1,483 | 2,707 | 2,964 | 4,013 | 5,310 | 5,727 |
| <b>160</b> | 0,289 | 3,951 | 1,485 | 2,664 | 2,918 | 3,951 | 5,221 | 5,629 |
| <b>161</b> | 0,316 | 3,878 | 1,488 | 2,612 | 2,863 | 3,878 | 5,116 | 5,510 |
| <b>162</b> | 0,352 | 3,797 | 1,491 | 2,554 | 2,801 | 3,797 | 4,998 | 5,378 |
| <b>163</b> | 0,394 | 3,714 | 1,495 | 2,493 | 2,737 | 3,714 | 4,876 | 5,240 |
| <b>164</b> | 0,443 | 3,627 | 1,499 | 2,429 | 2,671 | 3,627 | 4,749 | 5,098 |
| <b>165</b> | 0,499 | 3,536 | 1,504 | 2,362 | 2,601 | 3,536 | 4,615 | 4,947 |
| <b>166</b> | 0,559 | 3,436 | 1,509 | 2,288 | 2,524 | 3,436 | 4,470 | 4,784 |
| <b>167</b> | 0,624 | 3,325 | 1,515 | 2,206 | 2,438 | 3,325 | 4,310 | 4,607 |
| <b>168</b> | 0,692 | 3,207 | 1,520 | 2,121 | 2,349 | 3,207 | 4,143 | 4,422 |
| <b>169</b> | 0,764 | 3,091 | 1,526 | 2,036 | 2,260 | 3,091 | 3,979 | 4,240 |
| <b>170</b> | 0,838 | 2,982 | 1,532 | 1,956 | 2,176 | 2,982 | 3,826 | 4,071 |
| <b>171</b> | 0,914 | 2,890 | 1,538 | 1,886 | 2,105 | 2,890 | 3,694 | 3,924 |
| <b>172</b> | 0,992 | 2,817 | 1,545 | 1,830 | 2,048 | 2,817 | 3,589 | 3,807 |
| <b>173</b> | 1,071 | 2,760 | 1,551 | 1,784 | 2,002 | 2,760 | 3,504 | 3,712 |
| <b>174</b> | 1,151 | 2,712 | 1,557 | 1,743 | 1,963 | 2,712 | 3,431 | 3,630 |
| <b>175</b> | 1,233 | 2,668 | 1,564 | 1,704 | 1,926 | 2,668 | 3,364 | 3,555 |
| <b>176</b> | 1,315 | 2,627 | 1,570 | 1,668 | 1,892 | 2,627 | 3,302 | 3,485 |
| <b>177</b> | 1,398 | 2,587 | 1,576 | 1,631 | 1,859 | 2,587 | 3,241 | 3,417 |
| <b>178</b> | 1,482 | 2,546 | 1,583 | 1,593 | 1,823 | 2,546 | 3,179 | 3,348 |
| <b>179</b> | 1,566 | 2,500 | 1,589 | 1,552 | 1,786 | 2,500 | 3,113 | 3,274 |
| <b>180</b> | 1,651 | 2,450 | 1,595 | 1,509 | 1,745 | 2,450 | 3,042 | 3,196 |
| <b>181</b> | 1,736 | 2,395 | 1,602 | 1,462 | 1,700 | 2,395 | 2,965 | 3,113 |

|            |       |       |       |       |       |       |       |       |
|------------|-------|-------|-------|-------|-------|-------|-------|-------|
| <b>182</b> | 1,822 | 2,338 | 1,608 | 1,413 | 1,654 | 2,338 | 2,886 | 3,026 |
| <b>183</b> | 1,908 | 2,279 | 1,614 | 1,363 | 1,606 | 2,279 | 2,805 | 2,939 |

Table S5: Look up table for Rinsp at 8 Hz for male children and adolescents. Height in cm; 5<sup>th</sup>, 10<sup>th</sup>, 50<sup>th</sup>, 90<sup>th</sup> and 95<sup>th</sup> percentile.

Table S6 shows the created reference values for female children and adolescents for the parameter Rinsp at 8 Hz in the form of a look up table.

| Height     | lambda | mu    | sigma | 5%    | 10%   | 50%   | 90%    | 95%    |
|------------|--------|-------|-------|-------|-------|-------|--------|--------|
| <b>101</b> | -0,058 | 8,544 | 2,069 | 6,949 | 7,272 | 8,544 | 10,053 | 10,531 |
| <b>102</b> | -0,044 | 8,477 | 2,051 | 6,867 | 7,193 | 8,477 | 10,001 | 10,484 |
| <b>103</b> | -0,031 | 8,410 | 2,034 | 6,786 | 7,114 | 8,410 | 9,950  | 10,437 |
| <b>104</b> | -0,018 | 8,343 | 2,016 | 6,704 | 7,036 | 8,343 | 9,898  | 10,391 |
| <b>105</b> | -0,005 | 8,276 | 1,999 | 6,623 | 6,957 | 8,276 | 9,847  | 10,344 |
| <b>106</b> | 0,008  | 8,210 | 1,981 | 6,543 | 6,879 | 8,210 | 9,796  | 10,298 |
| <b>107</b> | 0,021  | 8,144 | 1,964 | 6,462 | 6,802 | 8,144 | 9,745  | 10,253 |
| <b>108</b> | 0,035  | 8,079 | 1,947 | 6,382 | 6,724 | 8,079 | 9,695  | 10,207 |
| <b>109</b> | 0,048  | 8,014 | 1,929 | 6,302 | 6,647 | 8,014 | 9,646  | 10,163 |
| <b>110</b> | 0,062  | 7,949 | 1,911 | 6,221 | 6,569 | 7,949 | 9,598  | 10,121 |
| <b>111</b> | 0,075  | 7,884 | 1,892 | 6,138 | 6,490 | 7,884 | 9,552  | 10,081 |
| <b>112</b> | 0,089  | 7,820 | 1,872 | 6,054 | 6,409 | 7,820 | 9,508  | 10,044 |
| <b>113</b> | 0,103  | 7,755 | 1,850 | 5,967 | 6,326 | 7,755 | 9,467  | 10,010 |
| <b>114</b> | 0,118  | 7,690 | 1,827 | 5,878 | 6,242 | 7,690 | 9,428  | 9,980  |
| <b>115</b> | 0,133  | 7,625 | 1,803 | 5,786 | 6,155 | 7,625 | 9,391  | 9,952  |
| <b>116</b> | 0,148  | 7,560 | 1,778 | 5,692 | 6,066 | 7,560 | 9,357  | 9,928  |
| <b>117</b> | 0,164  | 7,494 | 1,751 | 5,595 | 5,975 | 7,494 | 9,324  | 9,905  |
| <b>118</b> | 0,180  | 7,428 | 1,725 | 5,496 | 5,883 | 7,428 | 9,292  | 9,884  |
| <b>119</b> | 0,196  | 7,361 | 1,698 | 5,397 | 5,789 | 7,361 | 9,259  | 9,863  |
| <b>120</b> | 0,213  | 7,294 | 1,672 | 5,298 | 5,696 | 7,294 | 9,224  | 9,839  |
| <b>121</b> | 0,230  | 7,225 | 1,647 | 5,200 | 5,604 | 7,225 | 9,186  | 9,810  |
| <b>122</b> | 0,248  | 7,156 | 1,624 | 5,104 | 5,513 | 7,156 | 9,143  | 9,775  |
| <b>123</b> | 0,266  | 7,087 | 1,602 | 5,009 | 5,423 | 7,087 | 9,097  | 9,735  |
| <b>124</b> | 0,284  | 7,016 | 1,581 | 4,916 | 5,334 | 7,016 | 9,047  | 9,692  |
| <b>125</b> | 0,302  | 6,944 | 1,560 | 4,821 | 5,244 | 6,944 | 8,996  | 9,646  |
| <b>126</b> | 0,320  | 6,871 | 1,540 | 4,727 | 5,155 | 6,871 | 8,940  | 9,595  |
| <b>127</b> | 0,337  | 6,796 | 1,523 | 4,636 | 5,067 | 6,796 | 8,877  | 9,535  |
| <b>128</b> | 0,355  | 6,719 | 1,508 | 4,551 | 4,983 | 6,719 | 8,803  | 9,461  |
| <b>129</b> | 0,372  | 6,640 | 1,499 | 4,472 | 4,906 | 6,640 | 8,717  | 9,371  |
| <b>130</b> | 0,388  | 6,559 | 1,494 | 4,403 | 4,835 | 6,559 | 8,616  | 9,263  |
| <b>131</b> | 0,402  | 6,477 | 1,494 | 4,344 | 4,771 | 6,477 | 8,502  | 9,137  |
| <b>132</b> | 0,415  | 6,392 | 1,500 | 4,292 | 4,714 | 6,392 | 8,376  | 8,996  |
| <b>133</b> | 0,426  | 6,305 | 1,509 | 4,247 | 4,662 | 6,305 | 8,240  | 8,843  |
| <b>134</b> | 0,436  | 6,216 | 1,520 | 4,203 | 4,609 | 6,216 | 8,098  | 8,683  |

|     |        |       |       |       |       |       |       |       |
|-----|--------|-------|-------|-------|-------|-------|-------|-------|
| 135 | 0,444  | 6,123 | 1,531 | 4,156 | 4,555 | 6,123 | 7,953 | 8,521 |
| 136 | 0,451  | 6,027 | 1,541 | 4,106 | 4,496 | 6,027 | 7,808 | 8,359 |
| 137 | 0,456  | 5,928 | 1,549 | 4,051 | 4,432 | 5,928 | 7,662 | 8,198 |
| 138 | 0,460  | 5,825 | 1,556 | 3,991 | 4,364 | 5,825 | 7,517 | 8,039 |
| 139 | 0,461  | 5,720 | 1,560 | 3,926 | 4,291 | 5,720 | 7,373 | 7,883 |
| 140 | 0,461  | 5,612 | 1,562 | 3,855 | 4,212 | 5,612 | 7,230 | 7,729 |
| 141 | 0,458  | 5,501 | 1,562 | 3,779 | 4,130 | 5,501 | 7,089 | 7,579 |
| 142 | 0,453  | 5,389 | 1,559 | 3,699 | 4,043 | 5,389 | 6,950 | 7,432 |
| 143 | 0,445  | 5,277 | 1,554 | 3,617 | 3,954 | 5,277 | 6,814 | 7,290 |
| 144 | 0,435  | 5,164 | 1,548 | 3,533 | 3,864 | 5,164 | 6,681 | 7,152 |
| 145 | 0,421  | 5,052 | 1,540 | 3,450 | 3,774 | 5,052 | 6,552 | 7,018 |
| 146 | 0,405  | 4,942 | 1,532 | 3,366 | 3,684 | 4,942 | 6,426 | 6,889 |
| 147 | 0,385  | 4,833 | 1,521 | 3,283 | 3,594 | 4,833 | 6,305 | 6,766 |
| 148 | 0,363  | 4,726 | 1,510 | 3,201 | 3,505 | 4,726 | 6,187 | 6,648 |
| 149 | 0,337  | 4,620 | 1,498 | 3,120 | 3,418 | 4,620 | 6,072 | 6,533 |
| 150 | 0,309  | 4,515 | 1,487 | 3,042 | 3,333 | 4,515 | 5,960 | 6,421 |
| 151 | 0,277  | 4,413 | 1,476 | 2,967 | 3,251 | 4,413 | 5,849 | 6,311 |
| 152 | 0,241  | 4,313 | 1,466 | 2,896 | 3,173 | 4,313 | 5,741 | 6,204 |
| 153 | 0,203  | 4,216 | 1,457 | 2,829 | 3,098 | 4,216 | 5,634 | 6,098 |
| 154 | 0,161  | 4,122 | 1,449 | 2,766 | 3,027 | 4,122 | 5,530 | 5,996 |
| 155 | 0,116  | 4,030 | 1,442 | 2,707 | 2,960 | 4,030 | 5,429 | 5,897 |
| 156 | 0,068  | 3,943 | 1,436 | 2,652 | 2,897 | 3,943 | 5,332 | 5,802 |
| 157 | 0,018  | 3,859 | 1,432 | 2,601 | 2,839 | 3,859 | 5,237 | 5,709 |
| 158 | -0,035 | 3,779 | 1,429 | 2,555 | 2,784 | 3,779 | 5,144 | 5,618 |
| 159 | -0,089 | 3,702 | 1,430 | 2,514 | 2,735 | 3,702 | 5,053 | 5,527 |
| 160 | -0,145 | 3,629 | 1,433 | 2,478 | 2,691 | 3,629 | 4,962 | 5,436 |
| 161 | -0,202 | 3,561 | 1,440 | 2,447 | 2,652 | 3,561 | 4,871 | 5,343 |
| 162 | -0,261 | 3,496 | 1,451 | 2,422 | 2,619 | 3,496 | 4,779 | 5,248 |
| 163 | -0,320 | 3,434 | 1,466 | 2,400 | 2,589 | 3,434 | 4,686 | 5,148 |
| 164 | -0,381 | 3,374 | 1,485 | 2,382 | 2,562 | 3,374 | 4,590 | 5,043 |
| 165 | -0,441 | 3,315 | 1,508 | 2,365 | 2,538 | 3,315 | 4,490 | 4,932 |
| 166 | -0,502 | 3,257 | 1,533 | 2,349 | 2,514 | 3,257 | 4,387 | 4,815 |
| 167 | -0,564 | 3,198 | 1,561 | 2,333 | 2,490 | 3,198 | 4,282 | 4,695 |
| 168 | -0,626 | 3,140 | 1,592 | 2,317 | 2,466 | 3,140 | 4,174 | 4,572 |
| 169 | -0,688 | 3,081 | 1,625 | 2,300 | 2,441 | 3,081 | 4,065 | 4,445 |
| 170 | -0,750 | 3,021 | 1,660 | 2,281 | 2,415 | 3,021 | 3,955 | 4,316 |
| 171 | -0,813 | 2,960 | 1,696 | 2,261 | 2,388 | 2,960 | 3,842 | 4,184 |
| 172 | -0,876 | 2,898 | 1,735 | 2,238 | 2,358 | 2,898 | 3,728 | 4,050 |
| 173 | -0,939 | 2,835 | 1,776 | 2,214 | 2,327 | 2,835 | 3,613 | 3,915 |
| 174 | -1,002 | 2,771 | 1,819 | 2,187 | 2,294 | 2,771 | 3,498 | 3,779 |
| 175 | -1,065 | 2,706 | 1,864 | 2,159 | 2,259 | 2,706 | 3,383 | 3,644 |
| 176 | -1,129 | 2,640 | 1,909 | 2,129 | 2,223 | 2,640 | 3,269 | 3,511 |
| 177 | -1,192 | 2,574 | 1,956 | 2,096 | 2,185 | 2,574 | 3,157 | 3,380 |
| 178 | -1,255 | 2,508 | 2,004 | 2,062 | 2,145 | 2,508 | 3,047 | 3,252 |
| 179 | -1,318 | 2,442 | 2,052 | 2,026 | 2,104 | 2,442 | 2,940 | 3,128 |
| 180 | -1,382 | 2,375 | 2,100 | 1,989 | 2,061 | 2,375 | 2,835 | 3,007 |

|            |        |       |       |       |       |       |       |       |
|------------|--------|-------|-------|-------|-------|-------|-------|-------|
| <b>181</b> | -1,445 | 2,309 | 2,149 | 1,949 | 2,017 | 2,309 | 2,732 | 2,890 |
| <b>182</b> | -1,508 | 2,242 | 2,198 | 1,908 | 1,971 | 2,242 | 2,631 | 2,776 |
| <b>183</b> | -1,571 | 2,175 | 2,247 | 1,865 | 1,924 | 2,175 | 2,533 | 2,665 |

Table S6: Look up table for Rinsp at 8 Hz for female children and adolescents. Height in cm; 5<sup>th</sup>, 10<sup>th</sup>, 50<sup>th</sup>, 90<sup>th</sup> and 95<sup>th</sup> percentile.

Table S7 shows the created reference values for male children and adolescents for the parameter Rtot at 8 Hz in the form of a look up table.

| Height     | lambda | mu    | sigma | 5%    | 10%   | 50%   | 90%    | 95%    |
|------------|--------|-------|-------|-------|-------|-------|--------|--------|
| <b>101</b> | 0,012  | 9,267 | 1,979 | 7,380 | 7,761 | 9,267 | 11,061 | 11,629 |
| <b>102</b> | -0,002 | 9,187 | 1,965 | 7,296 | 7,677 | 9,187 | 10,996 | 11,570 |
| <b>103</b> | -0,017 | 9,108 | 1,951 | 7,213 | 7,594 | 9,108 | 10,931 | 11,512 |
| <b>104</b> | -0,032 | 9,029 | 1,937 | 7,130 | 7,510 | 9,029 | 10,865 | 11,453 |
| <b>105</b> | -0,046 | 8,949 | 1,924 | 7,047 | 7,427 | 8,949 | 10,801 | 11,395 |
| <b>106</b> | -0,061 | 8,870 | 1,910 | 6,964 | 7,344 | 8,870 | 10,736 | 11,337 |
| <b>107</b> | -0,076 | 8,790 | 1,896 | 6,882 | 7,261 | 8,790 | 10,671 | 11,280 |
| <b>108</b> | -0,090 | 8,711 | 1,882 | 6,800 | 7,179 | 8,711 | 10,606 | 11,222 |
| <b>109</b> | -0,105 | 8,631 | 1,868 | 6,718 | 7,096 | 8,631 | 10,542 | 11,165 |
| <b>110</b> | -0,120 | 8,552 | 1,855 | 6,637 | 7,014 | 8,552 | 10,477 | 11,108 |
| <b>111</b> | -0,134 | 8,473 | 1,841 | 6,555 | 6,932 | 8,473 | 10,413 | 11,051 |
| <b>112</b> | -0,149 | 8,393 | 1,827 | 6,474 | 6,851 | 8,393 | 10,349 | 10,995 |
| <b>113</b> | -0,164 | 8,314 | 1,813 | 6,394 | 6,769 | 8,314 | 10,284 | 10,939 |
| <b>114</b> | -0,178 | 8,234 | 1,799 | 6,313 | 6,687 | 8,234 | 10,220 | 10,882 |
| <b>115</b> | -0,192 | 8,154 | 1,786 | 6,232 | 6,606 | 8,154 | 10,156 | 10,826 |
| <b>116</b> | -0,204 | 8,075 | 1,772 | 6,152 | 6,524 | 8,075 | 10,090 | 10,769 |
| <b>117</b> | -0,215 | 7,994 | 1,758 | 6,071 | 6,443 | 7,994 | 10,025 | 10,711 |
| <b>118</b> | -0,224 | 7,914 | 1,744 | 5,990 | 6,361 | 7,914 | 9,958  | 10,652 |
| <b>119</b> | -0,231 | 7,833 | 1,731 | 5,908 | 6,278 | 7,833 | 9,890  | 10,591 |
| <b>120</b> | -0,236 | 7,752 | 1,717 | 5,826 | 6,195 | 7,752 | 9,821  | 10,528 |
| <b>121</b> | -0,238 | 7,669 | 1,704 | 5,743 | 6,112 | 7,669 | 9,749  | 10,463 |
| <b>122</b> | -0,238 | 7,586 | 1,690 | 5,660 | 6,027 | 7,586 | 9,675  | 10,394 |
| <b>123</b> | -0,234 | 7,501 | 1,677 | 5,575 | 5,942 | 7,501 | 9,598  | 10,321 |
| <b>124</b> | -0,226 | 7,416 | 1,664 | 5,488 | 5,855 | 7,416 | 9,518  | 10,243 |
| <b>125</b> | -0,213 | 7,329 | 1,651 | 5,400 | 5,768 | 7,329 | 9,434  | 10,160 |
| <b>126</b> | -0,194 | 7,241 | 1,638 | 5,311 | 5,678 | 7,241 | 9,347  | 10,072 |
| <b>127</b> | -0,169 | 7,153 | 1,626 | 5,220 | 5,588 | 7,153 | 9,255  | 9,978  |
| <b>128</b> | -0,136 | 7,064 | 1,613 | 5,126 | 5,496 | 7,064 | 9,160  | 9,877  |
| <b>129</b> | -0,095 | 6,974 | 1,601 | 5,031 | 5,403 | 6,974 | 9,060  | 9,770  |
| <b>130</b> | -0,044 | 6,885 | 1,589 | 4,933 | 5,308 | 6,885 | 8,957  | 9,656  |
| <b>131</b> | 0,015  | 6,795 | 1,577 | 4,834 | 5,212 | 6,795 | 8,850  | 9,536  |
| <b>132</b> | 0,082  | 6,706 | 1,566 | 4,732 | 5,115 | 6,706 | 8,740  | 9,411  |
| <b>133</b> | 0,155  | 6,617 | 1,554 | 4,629 | 5,018 | 6,617 | 8,627  | 9,283  |

|            |        |       |       |       |       |       |       |       |
|------------|--------|-------|-------|-------|-------|-------|-------|-------|
| <b>134</b> | 0,235  | 6,528 | 1,543 | 4,524 | 4,919 | 6,528 | 8,512 | 9,151 |
| <b>135</b> | 0,319  | 6,440 | 1,533 | 4,418 | 4,820 | 6,440 | 8,396 | 9,016 |
| <b>136</b> | 0,404  | 6,352 | 1,523 | 4,310 | 4,721 | 6,352 | 8,278 | 8,880 |
| <b>137</b> | 0,488  | 6,263 | 1,513 | 4,203 | 4,622 | 6,263 | 8,159 | 8,744 |
| <b>138</b> | 0,566  | 6,174 | 1,503 | 4,098 | 4,524 | 6,174 | 8,041 | 8,609 |
| <b>139</b> | 0,637  | 6,084 | 1,494 | 3,995 | 4,429 | 6,084 | 7,923 | 8,475 |
| <b>140</b> | 0,694  | 5,994 | 1,486 | 3,897 | 4,336 | 5,994 | 7,806 | 8,346 |
| <b>141</b> | 0,731  | 5,903 | 1,478 | 3,808 | 4,249 | 5,903 | 7,693 | 8,223 |
| <b>142</b> | 0,748  | 5,812 | 1,471 | 3,728 | 4,168 | 5,812 | 7,583 | 8,106 |
| <b>143</b> | 0,743  | 5,720 | 1,464 | 3,658 | 4,093 | 5,720 | 7,477 | 7,996 |
| <b>144</b> | 0,719  | 5,628 | 1,458 | 3,598 | 4,024 | 5,628 | 7,373 | 7,892 |
| <b>145</b> | 0,680  | 5,536 | 1,453 | 3,544 | 3,959 | 5,536 | 7,272 | 7,791 |
| <b>146</b> | 0,629  | 5,443 | 1,448 | 3,495 | 3,897 | 5,443 | 7,173 | 7,695 |
| <b>147</b> | 0,568  | 5,351 | 1,443 | 3,450 | 3,839 | 5,351 | 7,074 | 7,600 |
| <b>148</b> | 0,500  | 5,258 | 1,439 | 3,407 | 3,781 | 5,258 | 6,977 | 7,508 |
| <b>149</b> | 0,427  | 5,165 | 1,436 | 3,366 | 3,726 | 5,165 | 6,879 | 7,417 |
| <b>150</b> | 0,351  | 5,072 | 1,433 | 3,325 | 3,671 | 5,072 | 6,781 | 7,326 |
| <b>151</b> | 0,277  | 4,980 | 1,431 | 3,284 | 3,615 | 4,980 | 6,682 | 7,233 |
| <b>152</b> | 0,205  | 4,888 | 1,429 | 3,242 | 3,560 | 4,888 | 6,582 | 7,138 |
| <b>153</b> | 0,139  | 4,796 | 1,429 | 3,198 | 3,504 | 4,796 | 6,479 | 7,040 |
| <b>154</b> | 0,080  | 4,706 | 1,428 | 3,152 | 3,448 | 4,706 | 6,374 | 6,938 |
| <b>155</b> | 0,033  | 4,616 | 1,429 | 3,104 | 3,390 | 4,616 | 6,266 | 6,829 |
| <b>156</b> | -0,001 | 4,527 | 1,430 | 3,054 | 3,331 | 4,527 | 6,153 | 6,712 |
| <b>157</b> | -0,020 | 4,439 | 1,431 | 3,001 | 3,271 | 4,439 | 6,035 | 6,587 |
| <b>158</b> | -0,023 | 4,351 | 1,433 | 2,945 | 3,209 | 4,351 | 5,913 | 6,453 |
| <b>159</b> | -0,014 | 4,264 | 1,436 | 2,886 | 3,146 | 4,264 | 5,787 | 6,312 |
| <b>160</b> | 0,007  | 4,177 | 1,439 | 2,827 | 3,081 | 4,177 | 5,658 | 6,165 |
| <b>161</b> | 0,038  | 4,090 | 1,443 | 2,765 | 3,017 | 4,090 | 5,526 | 6,015 |
| <b>162</b> | 0,077  | 4,004 | 1,447 | 2,703 | 2,951 | 4,004 | 5,394 | 5,862 |
| <b>163</b> | 0,122  | 3,918 | 1,452 | 2,641 | 2,886 | 3,918 | 5,261 | 5,709 |
| <b>164</b> | 0,173  | 3,833 | 1,457 | 2,579 | 2,821 | 3,833 | 5,129 | 5,556 |
| <b>165</b> | 0,227  | 3,749 | 1,462 | 2,516 | 2,757 | 3,749 | 4,997 | 5,404 |
| <b>166</b> | 0,283  | 3,665 | 1,468 | 2,454 | 2,692 | 3,665 | 4,867 | 5,254 |
| <b>167</b> | 0,340  | 3,581 | 1,473 | 2,393 | 2,628 | 3,581 | 4,738 | 5,106 |
| <b>168</b> | 0,397  | 3,498 | 1,479 | 2,332 | 2,565 | 3,498 | 4,611 | 4,961 |
| <b>169</b> | 0,454  | 3,416 | 1,486 | 2,272 | 2,503 | 3,416 | 4,487 | 4,819 |
| <b>170</b> | 0,510  | 3,335 | 1,492 | 2,213 | 2,442 | 3,335 | 4,364 | 4,681 |
| <b>171</b> | 0,565  | 3,255 | 1,498 | 2,155 | 2,381 | 3,255 | 4,245 | 4,546 |
| <b>172</b> | 0,620  | 3,176 | 1,504 | 2,099 | 2,322 | 3,176 | 4,128 | 4,415 |
| <b>173</b> | 0,676  | 3,098 | 1,511 | 2,042 | 2,263 | 3,098 | 4,013 | 4,287 |
| <b>174</b> | 0,733  | 3,021 | 1,517 | 1,987 | 2,205 | 3,021 | 3,900 | 4,160 |
| <b>175</b> | 0,792  | 2,944 | 1,523 | 1,931 | 2,147 | 2,944 | 3,789 | 4,036 |
| <b>176</b> | 0,851  | 2,868 | 1,530 | 1,876 | 2,089 | 2,868 | 3,679 | 3,914 |
| <b>177</b> | 0,912  | 2,792 | 1,536 | 1,820 | 2,032 | 2,792 | 3,571 | 3,794 |
| <b>178</b> | 0,974  | 2,716 | 1,542 | 1,766 | 1,975 | 2,716 | 3,463 | 3,676 |
| <b>179</b> | 1,036  | 2,641 | 1,548 | 1,711 | 1,918 | 2,641 | 3,357 | 3,559 |

|            |       |       |       |       |       |       |       |       |
|------------|-------|-------|-------|-------|-------|-------|-------|-------|
| <b>180</b> | 1,098 | 2,566 | 1,555 | 1,656 | 1,861 | 2,566 | 3,252 | 3,444 |
| <b>181</b> | 1,161 | 2,491 | 1,561 | 1,602 | 1,804 | 2,491 | 3,148 | 3,330 |
| <b>182</b> | 1,224 | 2,416 | 1,567 | 1,548 | 1,747 | 2,416 | 3,045 | 3,218 |
| <b>183</b> | 1,287 | 2,341 | 1,573 | 1,494 | 1,691 | 2,341 | 2,942 | 3,106 |

Table S7: Look up table for Rtot at 8 Hz for male children and adolescents. Height in cm; 5<sup>th</sup>, 10<sup>th</sup>, 50<sup>th</sup>, 90<sup>th</sup> and 95<sup>th</sup> percentile.

Table S8 shows the created reference values for female children and adolescents for the parameter Rtot at 8 Hz in the form of a look up table.

| Height     | lambda | mu    | sigma | 5%    | 10%   | 50%   | 90%    | 95%    |
|------------|--------|-------|-------|-------|-------|-------|--------|--------|
| <b>101</b> | 0,291  | 9,401 | 1,891 | 7,265 | 7,704 | 9,401 | 11,347 | 11,947 |
| <b>102</b> | 0,298  | 9,318 | 1,885 | 7,188 | 7,625 | 9,318 | 11,258 | 11,856 |
| <b>103</b> | 0,305  | 9,235 | 1,879 | 7,110 | 7,547 | 9,235 | 11,170 | 11,766 |
| <b>104</b> | 0,312  | 9,153 | 1,872 | 7,033 | 7,468 | 9,153 | 11,082 | 11,676 |
| <b>105</b> | 0,318  | 9,071 | 1,865 | 6,955 | 7,390 | 9,071 | 10,996 | 11,588 |
| <b>106</b> | 0,325  | 8,989 | 1,858 | 6,877 | 7,311 | 8,989 | 10,910 | 11,501 |
| <b>107</b> | 0,332  | 8,908 | 1,850 | 6,798 | 7,232 | 8,908 | 10,826 | 11,416 |
| <b>108</b> | 0,339  | 8,828 | 1,842 | 6,719 | 7,153 | 8,828 | 10,744 | 11,333 |
| <b>109</b> | 0,346  | 8,748 | 1,833 | 6,639 | 7,073 | 8,748 | 10,664 | 11,253 |
| <b>110</b> | 0,353  | 8,669 | 1,823 | 6,558 | 6,992 | 8,669 | 10,587 | 11,177 |
| <b>111</b> | 0,360  | 8,591 | 1,811 | 6,475 | 6,909 | 8,591 | 10,513 | 11,104 |
| <b>112</b> | 0,367  | 8,513 | 1,798 | 6,389 | 6,825 | 8,513 | 10,443 | 11,037 |
| <b>113</b> | 0,374  | 8,436 | 1,783 | 6,301 | 6,739 | 8,436 | 10,377 | 10,974 |
| <b>114</b> | 0,381  | 8,359 | 1,767 | 6,210 | 6,651 | 8,359 | 10,314 | 10,916 |
| <b>115</b> | 0,388  | 8,283 | 1,750 | 6,117 | 6,561 | 8,283 | 10,255 | 10,862 |
| <b>116</b> | 0,396  | 8,207 | 1,731 | 6,022 | 6,469 | 8,207 | 10,200 | 10,814 |
| <b>117</b> | 0,403  | 8,132 | 1,710 | 5,924 | 6,376 | 8,132 | 10,148 | 10,769 |
| <b>118</b> | 0,411  | 8,056 | 1,689 | 5,824 | 6,280 | 8,056 | 10,098 | 10,727 |
| <b>119</b> | 0,419  | 7,981 | 1,667 | 5,723 | 6,184 | 7,981 | 10,049 | 10,686 |
| <b>120</b> | 0,427  | 7,906 | 1,646 | 5,622 | 6,089 | 7,906 | 10,000 | 10,645 |
| <b>121</b> | 0,435  | 7,830 | 1,625 | 5,523 | 5,994 | 7,830 | 9,948  | 10,601 |
| <b>122</b> | 0,443  | 7,755 | 1,605 | 5,426 | 5,900 | 7,755 | 9,895  | 10,555 |
| <b>123</b> | 0,452  | 7,679 | 1,586 | 5,329 | 5,808 | 7,679 | 9,840  | 10,506 |
| <b>124</b> | 0,460  | 7,603 | 1,567 | 5,232 | 5,715 | 7,603 | 9,784  | 10,456 |
| <b>125</b> | 0,469  | 7,526 | 1,548 | 5,135 | 5,622 | 7,526 | 9,727  | 10,405 |
| <b>126</b> | 0,477  | 7,447 | 1,529 | 5,038 | 5,528 | 7,447 | 9,666  | 10,350 |
| <b>127</b> | 0,486  | 7,367 | 1,513 | 4,945 | 5,437 | 7,367 | 9,599  | 10,287 |
| <b>128</b> | 0,495  | 7,285 | 1,499 | 4,857 | 5,351 | 7,285 | 9,520  | 10,209 |
| <b>129</b> | 0,504  | 7,201 | 1,491 | 4,778 | 5,271 | 7,201 | 9,428  | 10,113 |
| <b>130</b> | 0,513  | 7,114 | 1,487 | 4,709 | 5,199 | 7,114 | 9,320  | 9,998  |
| <b>131</b> | 0,520  | 7,025 | 1,489 | 4,651 | 5,135 | 7,025 | 9,197  | 9,863  |
| <b>132</b> | 0,527  | 6,933 | 1,495 | 4,601 | 5,077 | 6,933 | 9,060  | 9,711  |



|     |        |       |       |       |       |       |       |       |
|-----|--------|-------|-------|-------|-------|-------|-------|-------|
| 133 | 0,534  | 6,838 | 1,506 | 4,557 | 5,024 | 6,838 | 8,911 | 9,545 |
| 134 | 0,540  | 6,740 | 1,518 | 4,514 | 4,970 | 6,740 | 8,755 | 9,370 |
| 135 | 0,545  | 6,638 | 1,530 | 4,468 | 4,914 | 6,638 | 8,596 | 9,192 |
| 136 | 0,550  | 6,533 | 1,541 | 4,417 | 4,852 | 6,533 | 8,435 | 9,013 |
| 137 | 0,554  | 6,424 | 1,551 | 4,360 | 4,785 | 6,424 | 8,274 | 8,837 |
| 138 | 0,557  | 6,311 | 1,558 | 4,295 | 4,711 | 6,311 | 8,115 | 8,663 |
| 139 | 0,559  | 6,196 | 1,562 | 4,223 | 4,630 | 6,196 | 7,958 | 8,493 |
| 140 | 0,559  | 6,077 | 1,563 | 4,144 | 4,543 | 6,077 | 7,804 | 8,328 |
| 141 | 0,558  | 5,956 | 1,561 | 4,058 | 4,449 | 5,956 | 7,653 | 8,168 |
| 142 | 0,555  | 5,833 | 1,556 | 3,967 | 4,351 | 5,833 | 7,504 | 8,012 |
| 143 | 0,550  | 5,709 | 1,549 | 3,872 | 4,250 | 5,709 | 7,358 | 7,860 |
| 144 | 0,543  | 5,586 | 1,540 | 3,777 | 4,149 | 5,586 | 7,215 | 7,712 |
| 145 | 0,533  | 5,463 | 1,531 | 3,682 | 4,047 | 5,463 | 7,075 | 7,567 |
| 146 | 0,521  | 5,342 | 1,521 | 3,588 | 3,947 | 5,342 | 6,938 | 7,426 |
| 147 | 0,506  | 5,222 | 1,510 | 3,495 | 3,847 | 5,222 | 6,804 | 7,290 |
| 148 | 0,488  | 5,104 | 1,498 | 3,403 | 3,749 | 5,104 | 6,674 | 7,159 |
| 149 | 0,467  | 4,987 | 1,486 | 3,313 | 3,651 | 4,987 | 6,547 | 7,030 |
| 150 | 0,443  | 4,872 | 1,473 | 3,226 | 3,557 | 4,872 | 6,421 | 6,904 |
| 151 | 0,415  | 4,759 | 1,462 | 3,143 | 3,466 | 4,759 | 6,297 | 6,779 |
| 152 | 0,385  | 4,648 | 1,452 | 3,064 | 3,379 | 4,648 | 6,175 | 6,657 |
| 153 | 0,351  | 4,541 | 1,443 | 2,990 | 3,297 | 4,541 | 6,055 | 6,537 |
| 154 | 0,315  | 4,437 | 1,434 | 2,920 | 3,218 | 4,437 | 5,939 | 6,421 |
| 155 | 0,276  | 4,337 | 1,426 | 2,854 | 3,143 | 4,337 | 5,828 | 6,310 |
| 156 | 0,235  | 4,241 | 1,419 | 2,792 | 3,073 | 4,241 | 5,720 | 6,204 |
| 157 | 0,192  | 4,149 | 1,413 | 2,736 | 3,008 | 4,149 | 5,617 | 6,102 |
| 158 | 0,147  | 4,062 | 1,409 | 2,684 | 2,948 | 4,062 | 5,517 | 6,002 |
| 159 | 0,101  | 3,979 | 1,407 | 2,638 | 2,893 | 3,979 | 5,419 | 5,904 |
| 160 | 0,054  | 3,901 | 1,409 | 2,598 | 2,844 | 3,901 | 5,322 | 5,807 |
| 161 | 0,006  | 3,828 | 1,413 | 2,563 | 2,801 | 3,828 | 5,227 | 5,709 |
| 162 | -0,042 | 3,759 | 1,421 | 2,535 | 2,764 | 3,759 | 5,132 | 5,610 |
| 163 | -0,091 | 3,693 | 1,433 | 2,511 | 2,731 | 3,693 | 5,036 | 5,508 |
| 164 | -0,140 | 3,630 | 1,448 | 2,491 | 2,703 | 3,630 | 4,938 | 5,401 |
| 165 | -0,189 | 3,568 | 1,468 | 2,474 | 2,677 | 3,568 | 4,836 | 5,288 |
| 166 | -0,238 | 3,507 | 1,490 | 2,459 | 2,653 | 3,507 | 4,731 | 5,170 |
| 167 | -0,287 | 3,447 | 1,515 | 2,444 | 2,629 | 3,447 | 4,623 | 5,049 |
| 168 | -0,336 | 3,386 | 1,543 | 2,429 | 2,606 | 3,386 | 4,514 | 4,923 |
| 169 | -0,386 | 3,326 | 1,573 | 2,414 | 2,582 | 3,326 | 4,402 | 4,795 |
| 170 | -0,435 | 3,265 | 1,605 | 2,398 | 2,558 | 3,265 | 4,289 | 4,663 |
| 171 | -0,485 | 3,203 | 1,640 | 2,381 | 2,533 | 3,203 | 4,174 | 4,530 |
| 172 | -0,534 | 3,140 | 1,676 | 2,362 | 2,506 | 3,140 | 4,058 | 4,394 |
| 173 | -0,584 | 3,076 | 1,715 | 2,341 | 2,477 | 3,076 | 3,941 | 4,257 |
| 174 | -0,634 | 3,011 | 1,755 | 2,318 | 2,447 | 3,011 | 3,823 | 4,120 |
| 175 | -0,684 | 2,945 | 1,797 | 2,294 | 2,415 | 2,945 | 3,706 | 3,984 |
| 176 | -0,734 | 2,879 | 1,840 | 2,267 | 2,382 | 2,879 | 3,590 | 3,849 |
| 177 | -0,784 | 2,813 | 1,883 | 2,239 | 2,347 | 2,813 | 3,476 | 3,717 |
| 178 | -0,833 | 2,747 | 1,928 | 2,209 | 2,310 | 2,747 | 3,364 | 3,587 |



|            |        |       |       |       |       |       |       |       |
|------------|--------|-------|-------|-------|-------|-------|-------|-------|
| <b>179</b> | -0,883 | 2,681 | 1,973 | 2,177 | 2,272 | 2,681 | 3,255 | 3,462 |
| <b>180</b> | -0,933 | 2,615 | 2,019 | 2,144 | 2,233 | 2,615 | 3,148 | 3,339 |
| <b>181</b> | -0,983 | 2,549 | 2,064 | 2,109 | 2,192 | 2,549 | 3,044 | 3,220 |
| <b>182</b> | -1,033 | 2,483 | 2,110 | 2,072 | 2,150 | 2,483 | 2,941 | 3,104 |
| <b>183</b> | -1,083 | 2,417 | 2,156 | 2,033 | 2,106 | 2,417 | 2,842 | 2,992 |

Table S8: Look up table for Rtot at 8 Hz for female children and adolescents. Height in cm; 5<sup>th</sup>, 10<sup>th</sup>, 50<sup>th</sup>, 90<sup>th</sup> and 95<sup>th</sup> percentile.

Table S9 shows the created reference values for male children and adolescents for the parameter  $X_{exp}$  at 8 Hz in the form of a look up table.

| Height | lambda | mu     | sigma | 5%     | 10%    | 50%    | 90%    | 95%    |
|--------|--------|--------|-------|--------|--------|--------|--------|--------|
| 101    | 0,060  | -4,493 | 0,803 | -9,349 | -7,979 | -4,493 | -2,460 | -2,061 |
| 102    | 0,060  | -4,420 | 0,799 | -9,222 | -7,866 | -4,420 | -2,413 | -2,020 |
| 103    | 0,061  | -4,346 | 0,795 | -9,095 | -7,753 | -4,346 | -2,366 | -1,978 |
| 104    | 0,062  | -4,272 | 0,791 | -8,966 | -7,639 | -4,272 | -2,319 | -1,937 |
| 105    | 0,063  | -4,199 | 0,787 | -8,837 | -7,525 | -4,199 | -2,272 | -1,896 |
| 106    | 0,063  | -4,125 | 0,783 | -8,707 | -7,410 | -4,125 | -2,226 | -1,855 |
| 107    | 0,064  | -4,051 | 0,779 | -8,577 | -7,295 | -4,051 | -2,179 | -1,815 |
| 108    | 0,065  | -3,978 | 0,775 | -8,446 | -7,179 | -3,978 | -2,133 | -1,775 |
| 109    | 0,065  | -3,904 | 0,771 | -8,314 | -7,063 | -3,904 | -2,087 | -1,734 |
| 110    | 0,066  | -3,830 | 0,767 | -8,181 | -6,947 | -3,830 | -2,041 | -1,695 |
| 111    | 0,067  | -3,757 | 0,763 | -8,048 | -6,829 | -3,757 | -1,996 | -1,655 |
| 112    | 0,068  | -3,683 | 0,759 | -7,914 | -6,712 | -3,683 | -1,950 | -1,615 |
| 113    | 0,068  | -3,609 | 0,755 | -7,780 | -6,594 | -3,609 | -1,905 | -1,576 |
| 114    | 0,069  | -3,536 | 0,751 | -7,644 | -6,475 | -3,536 | -1,860 | -1,537 |
| 115    | 0,070  | -3,462 | 0,747 | -7,508 | -6,356 | -3,462 | -1,815 | -1,498 |
| 116    | 0,070  | -3,388 | 0,743 | -7,371 | -6,237 | -3,388 | -1,771 | -1,460 |
| 117    | 0,071  | -3,315 | 0,739 | -7,234 | -6,117 | -3,315 | -1,726 | -1,422 |
| 118    | 0,072  | -3,241 | 0,735 | -7,096 | -5,996 | -3,241 | -1,682 | -1,384 |
| 119    | 0,073  | -3,168 | 0,731 | -6,957 | -5,875 | -3,168 | -1,638 | -1,346 |
| 120    | 0,073  | -3,094 | 0,727 | -6,818 | -5,754 | -3,094 | -1,595 | -1,308 |
| 121    | 0,074  | -3,021 | 0,723 | -6,678 | -5,633 | -3,021 | -1,551 | -1,271 |
| 122    | 0,075  | -2,948 | 0,719 | -6,537 | -5,511 | -2,948 | -1,508 | -1,234 |
| 123    | 0,076  | -2,875 | 0,715 | -6,397 | -5,389 | -2,875 | -1,466 | -1,197 |
| 124    | 0,076  | -2,803 | 0,711 | -6,257 | -5,268 | -2,803 | -1,423 | -1,161 |
| 125    | 0,077  | -2,731 | 0,707 | -6,117 | -5,147 | -2,731 | -1,382 | -1,126 |
| 126    | 0,078  | -2,660 | 0,703 | -5,978 | -5,027 | -2,660 | -1,340 | -1,090 |
| 127    | 0,078  | -2,590 | 0,699 | -5,841 | -4,908 | -2,590 | -1,300 | -1,056 |
| 128    | 0,079  | -2,521 | 0,695 | -5,705 | -4,790 | -2,521 | -1,260 | -1,022 |
| 129    | 0,080  | -2,453 | 0,691 | -5,570 | -4,675 | -2,453 | -1,221 | -0,989 |
| 130    | 0,081  | -2,387 | 0,687 | -5,438 | -4,561 | -2,387 | -1,183 | -0,956 |
| 131    | 0,081  | -2,321 | 0,683 | -5,308 | -4,449 | -2,321 | -1,146 | -0,925 |
| 132    | 0,082  | -2,258 | 0,679 | -5,181 | -4,339 | -2,258 | -1,109 | -0,894 |
| 133    | 0,083  | -2,195 | 0,675 | -5,056 | -4,232 | -2,195 | -1,074 | -0,864 |
| 134    | 0,083  | -2,134 | 0,672 | -4,934 | -4,127 | -2,134 | -1,039 | -0,835 |
| 135    | 0,084  | -2,075 | 0,668 | -4,813 | -4,023 | -2,075 | -1,006 | -0,806 |
| 136    | 0,085  | -2,016 | 0,664 | -4,696 | -3,922 | -2,016 | -0,973 | -0,779 |
| 137    | 0,086  | -1,959 | 0,660 | -4,581 | -3,824 | -1,959 | -0,941 | -0,752 |
| 138    | 0,086  | -1,904 | 0,656 | -4,468 | -3,727 | -1,904 | -0,910 | -0,726 |
| 139    | 0,087  | -1,850 | 0,652 | -4,358 | -3,633 | -1,850 | -0,880 | -0,700 |
| 140    | 0,088  | -1,798 | 0,648 | -4,251 | -3,541 | -1,798 | -0,851 | -0,675 |
| 141    | 0,088  | -1,747 | 0,644 | -4,146 | -3,451 | -1,747 | -0,822 | -0,652 |
| 142    | 0,089  | -1,697 | 0,640 | -4,044 | -3,364 | -1,697 | -0,795 | -0,628 |

|     |       |        |       |        |        |        |        |        |
|-----|-------|--------|-------|--------|--------|--------|--------|--------|
| 143 | 0,090 | -1,648 | 0,636 | -3,944 | -3,279 | -1,648 | -0,768 | -0,606 |
| 144 | 0,091 | -1,601 | 0,632 | -3,847 | -3,195 | -1,601 | -0,742 | -0,584 |
| 145 | 0,091 | -1,555 | 0,628 | -3,751 | -3,114 | -1,555 | -0,717 | -0,563 |
| 146 | 0,092 | -1,510 | 0,624 | -3,658 | -3,034 | -1,510 | -0,692 | -0,542 |
| 147 | 0,093 | -1,466 | 0,620 | -3,565 | -2,955 | -1,466 | -0,668 | -0,522 |
| 148 | 0,093 | -1,423 | 0,616 | -3,475 | -2,878 | -1,423 | -0,644 | -0,502 |
| 149 | 0,094 | -1,380 | 0,612 | -3,386 | -2,802 | -1,380 | -0,621 | -0,483 |
| 150 | 0,095 | -1,339 | 0,608 | -3,299 | -2,728 | -1,339 | -0,599 | -0,464 |
| 151 | 0,096 | -1,298 | 0,604 | -3,213 | -2,655 | -1,298 | -0,577 | -0,446 |
| 152 | 0,096 | -1,259 | 0,600 | -3,129 | -2,583 | -1,259 | -0,556 | -0,428 |
| 153 | 0,097 | -1,220 | 0,596 | -3,046 | -2,513 | -1,220 | -0,535 | -0,411 |
| 154 | 0,098 | -1,182 | 0,592 | -2,965 | -2,444 | -1,182 | -0,515 | -0,394 |
| 155 | 0,098 | -1,145 | 0,588 | -2,886 | -2,377 | -1,145 | -0,495 | -0,378 |
| 156 | 0,099 | -1,108 | 0,584 | -2,806 | -2,310 | -1,108 | -0,476 | -0,362 |
| 157 | 0,100 | -1,072 | 0,580 | -2,728 | -2,243 | -1,072 | -0,457 | -0,346 |
| 158 | 0,101 | -1,036 | 0,576 | -2,649 | -2,176 | -1,036 | -0,438 | -0,330 |
| 159 | 0,101 | -0,999 | 0,572 | -2,569 | -2,109 | -0,999 | -0,419 | -0,315 |
| 160 | 0,102 | -0,963 | 0,568 | -2,490 | -2,042 | -0,963 | -0,400 | -0,299 |
| 161 | 0,103 | -0,927 | 0,564 | -2,409 | -1,974 | -0,927 | -0,381 | -0,284 |
| 162 | 0,103 | -0,890 | 0,560 | -2,327 | -1,905 | -0,890 | -0,363 | -0,269 |
| 163 | 0,104 | -0,854 | 0,556 | -2,245 | -1,836 | -0,854 | -0,344 | -0,254 |
| 164 | 0,105 | -0,817 | 0,552 | -2,162 | -1,766 | -0,817 | -0,326 | -0,238 |
| 165 | 0,106 | -0,780 | 0,548 | -2,078 | -1,696 | -0,780 | -0,307 | -0,223 |
| 166 | 0,106 | -0,743 | 0,544 | -1,993 | -1,625 | -0,743 | -0,289 | -0,208 |
| 167 | 0,107 | -0,707 | 0,540 | -1,908 | -1,554 | -0,707 | -0,271 | -0,194 |
| 168 | 0,108 | -0,671 | 0,536 | -1,824 | -1,484 | -0,671 | -0,253 | -0,179 |
| 169 | 0,108 | -0,635 | 0,533 | -1,741 | -1,415 | -0,635 | -0,235 | -0,165 |
| 170 | 0,109 | -0,600 | 0,529 | -1,660 | -1,347 | -0,600 | -0,218 | -0,151 |
| 171 | 0,110 | -0,566 | 0,525 | -1,580 | -1,281 | -0,566 | -0,202 | -0,138 |
| 172 | 0,111 | -0,534 | 0,521 | -1,503 | -1,216 | -0,534 | -0,186 | -0,125 |
| 173 | 0,111 | -0,502 | 0,517 | -1,427 | -1,154 | -0,502 | -0,171 | -0,113 |
| 174 | 0,112 | -0,471 | 0,513 | -1,353 | -1,092 | -0,471 | -0,156 | -0,101 |
| 175 | 0,113 | -0,440 | 0,509 | -1,280 | -1,031 | -0,440 | -0,141 | -0,089 |
| 176 | 0,113 | -0,410 | 0,505 | -1,207 | -0,971 | -0,410 | -0,127 | -0,078 |
| 177 | 0,114 | -0,381 | 0,501 | -1,136 | -0,912 | -0,381 | -0,113 | -0,067 |
| 178 | 0,115 | -0,351 | 0,497 | -1,064 | -0,853 | -0,351 | -0,099 | -0,056 |
| 179 | 0,116 | -0,322 | 0,493 | -0,992 | -0,793 | -0,322 | -0,086 | -0,045 |
| 180 | 0,116 | -0,293 | 0,489 | -0,920 | -0,734 | -0,293 | -0,072 | -0,034 |
| 181 | 0,117 | -0,264 | 0,485 | -0,847 | -0,674 | -0,264 | -0,059 | -0,024 |
| 182 | 0,118 | -0,235 | 0,481 | -0,774 | -0,614 | -0,235 | -0,046 | -0,013 |
| 183 | 0,118 | -0,205 | 0,477 | -0,701 | -0,553 | -0,205 | -0,032 | -0,003 |

Table S9: Look up table for Xexp at 8 Hz for male children and adolescents. Height in cm; 5<sup>th</sup>, 10<sup>th</sup>, 50<sup>th</sup>, 90<sup>th</sup> and 95<sup>th</sup> percentile. Since X occurs in the range of negative values X parameters were shifted with the following function:  $f(x) = X * (-1) + 0.1$

Table S10 shows the created reference values for female children and adolescents for the parameter  $X_{exp}$  at 8 Hz in the form of a look up table.

| Height | lambda | mu     | sigma | 5%     | 10%    | 50%    | 90%    | 95%    |
|--------|--------|--------|-------|--------|--------|--------|--------|--------|
| 101    | 0,260  | -3,825 | 1,190 | -6,183 | -5,590 | -3,825 | -2,502 | -2,196 |
| 102    | 0,259  | -3,769 | 1,172 | -6,142 | -5,544 | -3,769 | -2,445 | -2,141 |
| 103    | 0,258  | -3,713 | 1,155 | -6,101 | -5,498 | -3,713 | -2,389 | -2,086 |
| 104    | 0,257  | -3,657 | 1,138 | -6,060 | -5,452 | -3,657 | -2,334 | -2,032 |
| 105    | 0,256  | -3,601 | 1,120 | -6,019 | -5,405 | -3,601 | -2,278 | -1,978 |
| 106    | 0,255  | -3,545 | 1,103 | -5,977 | -5,359 | -3,545 | -2,224 | -1,925 |
| 107    | 0,253  | -3,489 | 1,085 | -5,935 | -5,312 | -3,489 | -2,169 | -1,872 |
| 108    | 0,252  | -3,433 | 1,068 | -5,893 | -5,264 | -3,433 | -2,115 | -1,820 |
| 109    | 0,251  | -3,377 | 1,051 | -5,850 | -5,216 | -3,377 | -2,061 | -1,768 |
| 110    | 0,250  | -3,321 | 1,033 | -5,806 | -5,168 | -3,321 | -2,008 | -1,717 |
| 111    | 0,249  | -3,265 | 1,016 | -5,762 | -5,119 | -3,265 | -1,955 | -1,666 |
| 112    | 0,248  | -3,208 | 0,999 | -5,718 | -5,070 | -3,208 | -1,903 | -1,616 |
| 113    | 0,247  | -3,152 | 0,982 | -5,672 | -5,020 | -3,152 | -1,851 | -1,566 |
| 114    | 0,246  | -3,096 | 0,964 | -5,626 | -4,969 | -3,096 | -1,799 | -1,517 |
| 115    | 0,245  | -3,040 | 0,947 | -5,579 | -4,918 | -3,040 | -1,748 | -1,469 |
| 116    | 0,244  | -2,983 | 0,930 | -5,532 | -4,867 | -2,983 | -1,697 | -1,421 |
| 117    | 0,243  | -2,927 | 0,912 | -5,486 | -4,817 | -2,927 | -1,646 | -1,373 |
| 118    | 0,242  | -2,870 | 0,894 | -5,441 | -4,766 | -2,870 | -1,596 | -1,325 |
| 119    | 0,241  | -2,814 | 0,875 | -5,397 | -4,717 | -2,814 | -1,545 | -1,278 |
| 120    | 0,240  | -2,758 | 0,856 | -5,354 | -4,668 | -2,758 | -1,494 | -1,230 |
| 121    | 0,238  | -2,702 | 0,835 | -5,315 | -4,622 | -2,702 | -1,443 | -1,182 |
| 122    | 0,237  | -2,646 | 0,813 | -5,281 | -4,580 | -2,646 | -1,391 | -1,132 |
| 123    | 0,236  | -2,590 | 0,790 | -5,250 | -4,540 | -2,590 | -1,338 | -1,083 |
| 124    | 0,235  | -2,534 | 0,766 | -5,221 | -4,500 | -2,534 | -1,286 | -1,033 |
| 125    | 0,234  | -2,478 | 0,742 | -5,192 | -4,460 | -2,478 | -1,234 | -0,985 |
| 126    | 0,233  | -2,422 | 0,719 | -5,158 | -4,417 | -2,422 | -1,185 | -0,939 |
| 127    | 0,232  | -2,366 | 0,699 | -5,115 | -4,368 | -2,366 | -1,138 | -0,896 |
| 128    | 0,231  | -2,311 | 0,682 | -5,058 | -4,309 | -2,311 | -1,095 | -0,857 |
| 129    | 0,230  | -2,255 | 0,670 | -4,982 | -4,236 | -2,255 | -1,057 | -0,824 |
| 130    | 0,229  | -2,199 | 0,664 | -4,884 | -4,149 | -2,199 | -1,024 | -0,797 |
| 131    | 0,228  | -2,143 | 0,664 | -4,765 | -4,047 | -2,143 | -0,997 | -0,776 |
| 132    | 0,227  | -2,087 | 0,669 | -4,627 | -3,932 | -2,087 | -0,975 | -0,759 |
| 133    | 0,226  | -2,031 | 0,679 | -4,476 | -3,808 | -2,031 | -0,955 | -0,746 |
| 134    | 0,225  | -1,975 | 0,692 | -4,317 | -3,678 | -1,975 | -0,938 | -0,735 |
| 135    | 0,224  | -1,918 | 0,706 | -4,156 | -3,547 | -1,918 | -0,921 | -0,724 |
| 136    | 0,222  | -1,862 | 0,721 | -3,995 | -3,416 | -1,862 | -0,903 | -0,713 |
| 137    | 0,221  | -1,806 | 0,736 | -3,841 | -3,289 | -1,806 | -0,885 | -0,701 |
| 138    | 0,220  | -1,749 | 0,748 | -3,694 | -3,168 | -1,749 | -0,864 | -0,687 |
| 139    | 0,219  | -1,693 | 0,757 | -3,557 | -3,053 | -1,693 | -0,841 | -0,670 |
| 140    | 0,218  | -1,636 | 0,763 | -3,429 | -2,945 | -1,636 | -0,815 | -0,650 |
| 141    | 0,217  | -1,580 | 0,765 | -3,310 | -2,843 | -1,580 | -0,787 | -0,628 |
| 142    | 0,216  | -1,524 | 0,764 | -3,200 | -2,747 | -1,524 | -0,758 | -0,603 |

|     |       |        |       |        |        |        |        |        |
|-----|-------|--------|-------|--------|--------|--------|--------|--------|
| 143 | 0,215 | -1,469 | 0,760 | -3,097 | -2,657 | -1,469 | -0,726 | -0,577 |
| 144 | 0,214 | -1,414 | 0,752 | -3,002 | -2,572 | -1,414 | -0,693 | -0,549 |
| 145 | 0,213 | -1,360 | 0,742 | -2,912 | -2,491 | -1,360 | -0,660 | -0,520 |
| 146 | 0,212 | -1,308 | 0,732 | -2,826 | -2,413 | -1,308 | -0,627 | -0,492 |
| 147 | 0,211 | -1,256 | 0,720 | -2,741 | -2,336 | -1,256 | -0,595 | -0,464 |
| 148 | 0,210 | -1,206 | 0,708 | -2,660 | -2,262 | -1,206 | -0,563 | -0,437 |
| 149 | 0,209 | -1,157 | 0,696 | -2,580 | -2,190 | -1,157 | -0,533 | -0,411 |
| 150 | 0,208 | -1,109 | 0,683 | -2,501 | -2,119 | -1,109 | -0,504 | -0,386 |
| 151 | 0,206 | -1,063 | 0,671 | -2,426 | -2,050 | -1,063 | -0,475 | -0,362 |
| 152 | 0,205 | -1,019 | 0,658 | -2,353 | -1,985 | -1,019 | -0,448 | -0,339 |
| 153 | 0,204 | -0,977 | 0,644 | -2,285 | -1,923 | -0,977 | -0,422 | -0,316 |
| 154 | 0,203 | -0,936 | 0,629 | -2,222 | -1,864 | -0,936 | -0,396 | -0,294 |
| 155 | 0,202 | -0,897 | 0,612 | -2,164 | -1,810 | -0,897 | -0,372 | -0,273 |
| 156 | 0,201 | -0,860 | 0,595 | -2,110 | -1,760 | -0,860 | -0,348 | -0,253 |
| 157 | 0,200 | -0,825 | 0,577 | -2,060 | -1,713 | -0,825 | -0,325 | -0,233 |
| 158 | 0,199 | -0,792 | 0,559 | -2,013 | -1,668 | -0,792 | -0,304 | -0,215 |
| 159 | 0,198 | -0,760 | 0,541 | -1,967 | -1,625 | -0,760 | -0,284 | -0,198 |
| 160 | 0,197 | -0,730 | 0,525 | -1,922 | -1,583 | -0,730 | -0,265 | -0,182 |
| 161 | 0,196 | -0,702 | 0,510 | -1,878 | -1,542 | -0,702 | -0,248 | -0,168 |
| 162 | 0,195 | -0,676 | 0,496 | -1,836 | -1,503 | -0,676 | -0,233 | -0,155 |
| 163 | 0,194 | -0,650 | 0,484 | -1,794 | -1,465 | -0,650 | -0,218 | -0,143 |
| 164 | 0,193 | -0,627 | 0,473 | -1,751 | -1,427 | -0,627 | -0,205 | -0,132 |
| 165 | 0,191 | -0,604 | 0,465 | -1,707 | -1,388 | -0,604 | -0,194 | -0,123 |
| 166 | 0,190 | -0,582 | 0,460 | -1,660 | -1,348 | -0,582 | -0,183 | -0,114 |
| 167 | 0,189 | -0,561 | 0,458 | -1,609 | -1,305 | -0,561 | -0,174 | -0,107 |
| 168 | 0,188 | -0,541 | 0,460 | -1,554 | -1,260 | -0,541 | -0,166 | -0,102 |
| 169 | 0,187 | -0,521 | 0,465 | -1,496 | -1,214 | -0,521 | -0,159 | -0,097 |
| 170 | 0,186 | -0,501 | 0,473 | -1,436 | -1,165 | -0,501 | -0,153 | -0,093 |
| 171 | 0,185 | -0,482 | 0,484 | -1,374 | -1,117 | -0,482 | -0,148 | -0,090 |
| 172 | 0,184 | -0,464 | 0,497 | -1,313 | -1,068 | -0,464 | -0,143 | -0,086 |
| 173 | 0,183 | -0,446 | 0,510 | -1,252 | -1,021 | -0,446 | -0,138 | -0,084 |
| 174 | 0,182 | -0,428 | 0,525 | -1,193 | -0,974 | -0,428 | -0,134 | -0,081 |
| 175 | 0,181 | -0,410 | 0,541 | -1,134 | -0,928 | -0,410 | -0,129 | -0,078 |
| 176 | 0,180 | -0,393 | 0,557 | -1,078 | -0,883 | -0,393 | -0,125 | -0,076 |
| 177 | 0,179 | -0,377 | 0,574 | -1,023 | -0,840 | -0,377 | -0,120 | -0,073 |
| 178 | 0,178 | -0,360 | 0,591 | -0,970 | -0,797 | -0,360 | -0,116 | -0,070 |
| 179 | 0,177 | -0,344 | 0,609 | -0,918 | -0,756 | -0,344 | -0,111 | -0,068 |
| 180 | 0,175 | -0,327 | 0,626 | -0,868 | -0,716 | -0,327 | -0,106 | -0,064 |
| 181 | 0,174 | -0,311 | 0,644 | -0,819 | -0,677 | -0,311 | -0,101 | -0,061 |
| 182 | 0,173 | -0,295 | 0,662 | -0,771 | -0,638 | -0,295 | -0,096 | -0,058 |
| 183 | 0,172 | -0,279 | 0,680 | -0,725 | -0,601 | -0,279 | -0,090 | -0,054 |

Table S10: Look up table for Xexp at 8 Hz for female children and adolescents. Height in cm; 5<sup>th</sup>, 10<sup>th</sup>, 50<sup>th</sup>, 90<sup>th</sup> and 95<sup>th</sup> percentile. Since X occurs in the range of negative values X parameters were shifted with the following function:  $f(x) = X * (-1) + 0.1$

Table S11 shows the created reference values for male children and adolescents for the parameter  $X_{insp}$  at 8 Hz in the form of a look up table.

| Height | lambda | mu     | sigma | 5%     | 10%    | 50%    | 90%    | 95%    |
|--------|--------|--------|-------|--------|--------|--------|--------|--------|
| 101    | 0,943  | -2,533 | 1,106 | -3,986 | -3,662 | -2,533 | -1,432 | -1,127 |
| 102    | 0,931  | -2,500 | 1,099 | -3,947 | -3,624 | -2,500 | -1,409 | -1,108 |
| 103    | 0,920  | -2,466 | 1,093 | -3,909 | -3,586 | -2,466 | -1,385 | -1,089 |
| 104    | 0,908  | -2,432 | 1,086 | -3,869 | -3,547 | -2,432 | -1,362 | -1,070 |
| 105    | 0,897  | -2,399 | 1,080 | -3,830 | -3,508 | -2,399 | -1,339 | -1,051 |
| 106    | 0,885  | -2,365 | 1,073 | -3,791 | -3,470 | -2,365 | -1,316 | -1,032 |
| 107    | 0,874  | -2,331 | 1,067 | -3,751 | -3,431 | -2,331 | -1,293 | -1,014 |
| 108    | 0,862  | -2,298 | 1,060 | -3,711 | -3,392 | -2,298 | -1,270 | -0,995 |
| 109    | 0,850  | -2,264 | 1,054 | -3,671 | -3,352 | -2,264 | -1,247 | -0,977 |
| 110    | 0,839  | -2,230 | 1,047 | -3,631 | -3,313 | -2,230 | -1,225 | -0,958 |
| 111    | 0,827  | -2,197 | 1,041 | -3,591 | -3,273 | -2,197 | -1,202 | -0,940 |
| 112    | 0,816  | -2,163 | 1,034 | -3,550 | -3,234 | -2,163 | -1,180 | -0,922 |
| 113    | 0,804  | -2,129 | 1,027 | -3,510 | -3,194 | -2,129 | -1,158 | -0,904 |
| 114    | 0,793  | -2,095 | 1,021 | -3,469 | -3,154 | -2,095 | -1,136 | -0,886 |
| 115    | 0,781  | -2,062 | 1,014 | -3,427 | -3,114 | -2,062 | -1,113 | -0,868 |
| 116    | 0,770  | -2,028 | 1,008 | -3,386 | -3,073 | -2,028 | -1,091 | -0,851 |
| 117    | 0,758  | -1,994 | 1,001 | -3,344 | -3,032 | -1,994 | -1,069 | -0,833 |
| 118    | 0,747  | -1,960 | 0,995 | -3,301 | -2,991 | -1,960 | -1,048 | -0,815 |
| 119    | 0,735  | -1,926 | 0,988 | -3,258 | -2,949 | -1,926 | -1,026 | -0,798 |
| 120    | 0,723  | -1,891 | 0,982 | -3,215 | -2,907 | -1,891 | -1,004 | -0,781 |
| 121    | 0,712  | -1,857 | 0,975 | -3,172 | -2,865 | -1,857 | -0,982 | -0,763 |
| 122    | 0,700  | -1,823 | 0,969 | -3,128 | -2,822 | -1,823 | -0,961 | -0,746 |
| 123    | 0,689  | -1,788 | 0,962 | -3,083 | -2,780 | -1,788 | -0,939 | -0,729 |
| 124    | 0,677  | -1,754 | 0,955 | -3,038 | -2,736 | -1,754 | -0,917 | -0,711 |
| 125    | 0,666  | -1,719 | 0,949 | -2,993 | -2,693 | -1,719 | -0,896 | -0,694 |
| 126    | 0,654  | -1,684 | 0,942 | -2,947 | -2,648 | -1,684 | -0,874 | -0,677 |
| 127    | 0,643  | -1,649 | 0,936 | -2,901 | -2,604 | -1,649 | -0,853 | -0,660 |
| 128    | 0,631  | -1,614 | 0,929 | -2,855 | -2,560 | -1,614 | -0,832 | -0,643 |
| 129    | 0,620  | -1,580 | 0,923 | -2,808 | -2,515 | -1,580 | -0,811 | -0,627 |
| 130    | 0,608  | -1,545 | 0,916 | -2,762 | -2,471 | -1,545 | -0,790 | -0,610 |
| 131    | 0,597  | -1,511 | 0,910 | -2,715 | -2,426 | -1,511 | -0,769 | -0,594 |
| 132    | 0,585  | -1,477 | 0,903 | -2,668 | -2,381 | -1,477 | -0,749 | -0,577 |
| 133    | 0,573  | -1,442 | 0,897 | -2,621 | -2,337 | -1,442 | -0,728 | -0,561 |
| 134    | 0,562  | -1,408 | 0,890 | -2,574 | -2,292 | -1,408 | -0,708 | -0,545 |
| 135    | 0,550  | -1,374 | 0,883 | -2,527 | -2,247 | -1,374 | -0,688 | -0,529 |

|     |       |        |       |        |        |        |        |        |
|-----|-------|--------|-------|--------|--------|--------|--------|--------|
| 136 | 0,539 | -1,340 | 0,877 | -2,479 | -2,202 | -1,340 | -0,668 | -0,513 |
| 137 | 0,527 | -1,307 | 0,870 | -2,432 | -2,157 | -1,307 | -0,649 | -0,498 |
| 138 | 0,516 | -1,273 | 0,864 | -2,385 | -2,112 | -1,273 | -0,629 | -0,482 |
| 139 | 0,504 | -1,240 | 0,857 | -2,337 | -2,067 | -1,240 | -0,610 | -0,467 |
| 140 | 0,493 | -1,207 | 0,851 | -2,290 | -2,023 | -1,207 | -0,591 | -0,452 |
| 141 | 0,481 | -1,175 | 0,844 | -2,244 | -1,979 | -1,175 | -0,572 | -0,437 |
| 142 | 0,470 | -1,143 | 0,838 | -2,197 | -1,935 | -1,143 | -0,554 | -0,423 |
| 143 | 0,458 | -1,112 | 0,831 | -2,151 | -1,892 | -1,112 | -0,536 | -0,408 |
| 144 | 0,446 | -1,081 | 0,825 | -2,106 | -1,849 | -1,081 | -0,518 | -0,394 |
| 145 | 0,435 | -1,050 | 0,818 | -2,061 | -1,807 | -1,050 | -0,501 | -0,381 |
| 146 | 0,423 | -1,020 | 0,811 | -2,017 | -1,766 | -1,020 | -0,484 | -0,367 |
| 147 | 0,412 | -0,991 | 0,805 | -1,974 | -1,724 | -0,991 | -0,467 | -0,354 |
| 148 | 0,400 | -0,962 | 0,798 | -1,930 | -1,684 | -0,962 | -0,451 | -0,341 |
| 149 | 0,389 | -0,933 | 0,792 | -1,888 | -1,644 | -0,933 | -0,435 | -0,329 |
| 150 | 0,377 | -0,905 | 0,785 | -1,845 | -1,604 | -0,905 | -0,419 | -0,316 |
| 151 | 0,366 | -0,878 | 0,779 | -1,804 | -1,566 | -0,878 | -0,404 | -0,304 |
| 152 | 0,354 | -0,851 | 0,772 | -1,764 | -1,528 | -0,851 | -0,389 | -0,292 |
| 153 | 0,343 | -0,825 | 0,766 | -1,724 | -1,491 | -0,825 | -0,375 | -0,281 |
| 154 | 0,331 | -0,799 | 0,759 | -1,686 | -1,455 | -0,799 | -0,361 | -0,270 |
| 155 | 0,319 | -0,775 | 0,753 | -1,648 | -1,419 | -0,775 | -0,347 | -0,259 |
| 156 | 0,308 | -0,750 | 0,746 | -1,611 | -1,385 | -0,750 | -0,334 | -0,248 |
| 157 | 0,296 | -0,727 | 0,739 | -1,575 | -1,351 | -0,727 | -0,321 | -0,238 |
| 158 | 0,285 | -0,704 | 0,733 | -1,540 | -1,318 | -0,704 | -0,308 | -0,228 |
| 159 | 0,273 | -0,681 | 0,726 | -1,505 | -1,285 | -0,681 | -0,296 | -0,219 |
| 160 | 0,262 | -0,659 | 0,720 | -1,470 | -1,253 | -0,659 | -0,284 | -0,209 |
| 161 | 0,250 | -0,637 | 0,713 | -1,436 | -1,220 | -0,637 | -0,272 | -0,200 |
| 162 | 0,239 | -0,615 | 0,707 | -1,401 | -1,188 | -0,615 | -0,260 | -0,190 |
| 163 | 0,227 | -0,593 | 0,700 | -1,367 | -1,156 | -0,593 | -0,249 | -0,181 |
| 164 | 0,216 | -0,572 | 0,694 | -1,332 | -1,124 | -0,572 | -0,237 | -0,172 |
| 165 | 0,204 | -0,550 | 0,687 | -1,296 | -1,091 | -0,550 | -0,226 | -0,163 |
| 166 | 0,193 | -0,528 | 0,681 | -1,261 | -1,058 | -0,528 | -0,214 | -0,154 |
| 167 | 0,181 | -0,507 | 0,674 | -1,224 | -1,025 | -0,507 | -0,203 | -0,144 |
| 168 | 0,169 | -0,485 | 0,667 | -1,188 | -0,991 | -0,485 | -0,191 | -0,135 |
| 169 | 0,158 | -0,464 | 0,661 | -1,151 | -0,958 | -0,464 | -0,180 | -0,126 |
| 170 | 0,146 | -0,442 | 0,654 | -1,113 | -0,923 | -0,442 | -0,169 | -0,117 |
| 171 | 0,135 | -0,421 | 0,648 | -1,075 | -0,889 | -0,421 | -0,158 | -0,109 |
| 172 | 0,123 | -0,399 | 0,641 | -1,037 | -0,855 | -0,399 | -0,147 | -0,100 |
| 173 | 0,112 | -0,378 | 0,635 | -0,999 | -0,820 | -0,378 | -0,136 | -0,091 |
| 174 | 0,100 | -0,357 | 0,628 | -0,960 | -0,785 | -0,357 | -0,125 | -0,082 |
| 175 | 0,089 | -0,336 | 0,622 | -0,920 | -0,750 | -0,336 | -0,114 | -0,074 |
| 176 | 0,077 | -0,315 | 0,615 | -0,880 | -0,714 | -0,315 | -0,103 | -0,065 |
| 177 | 0,066 | -0,294 | 0,609 | -0,839 | -0,678 | -0,294 | -0,093 | -0,056 |
| 178 | 0,054 | -0,272 | 0,602 | -0,797 | -0,641 | -0,272 | -0,082 | -0,048 |
| 179 | 0,042 | -0,251 | 0,595 | -0,754 | -0,604 | -0,251 | -0,071 | -0,039 |
| 180 | 0,031 | -0,229 | 0,589 | -0,710 | -0,565 | -0,229 | -0,060 | -0,030 |
| 181 | 0,019 | -0,207 | 0,582 | -0,664 | -0,526 | -0,207 | -0,049 | -0,022 |

|            |        |        |       |        |        |        |        |        |
|------------|--------|--------|-------|--------|--------|--------|--------|--------|
| <b>182</b> | 0,008  | -0,186 | 0,576 | -0,618 | -0,486 | -0,186 | -0,039 | -0,013 |
| <b>183</b> | -0,004 | -0,164 | 0,569 | -0,570 | -0,445 | -0,164 | -0,028 | -0,004 |

Table S11: Look up table for X<sub>insp</sub> at 8 Hz for male children and adolescents. Height in cm; 5<sup>th</sup>, 10<sup>th</sup>, 50<sup>th</sup>, 90<sup>th</sup> and 95<sup>th</sup> percentile. Since X occurs in the range of negative values X parameters were shifted with the following function:  $f(x) = X * (-1) + 0.1$

Table S12 shows the created reference values for female children and adolescents for the parameter X<sub>insp</sub> at 8 Hz in the form of a look up table.

| Height     | lambda | mu     | sigma | 5%     | 10%    | 50%    | 90%    | 95%    |
|------------|--------|--------|-------|--------|--------|--------|--------|--------|
| <b>101</b> | 0,467  | -3,110 | 1,142 | -5,034 | -4,568 | -3,110 | -1,939 | -1,658 |
| <b>102</b> | 0,473  | -3,060 | 1,141 | -4,952 | -4,494 | -3,060 | -1,904 | -1,627 |
| <b>103</b> | 0,479  | -3,009 | 1,140 | -4,871 | -4,420 | -3,009 | -1,869 | -1,595 |
| <b>104</b> | 0,486  | -2,958 | 1,138 | -4,789 | -4,347 | -2,958 | -1,834 | -1,563 |
| <b>105</b> | 0,492  | -2,907 | 1,137 | -4,707 | -4,273 | -2,907 | -1,799 | -1,532 |
| <b>106</b> | 0,498  | -2,856 | 1,136 | -4,625 | -4,199 | -2,856 | -1,765 | -1,501 |
| <b>107</b> | 0,504  | -2,805 | 1,135 | -4,543 | -4,125 | -2,805 | -1,730 | -1,470 |
| <b>108</b> | 0,511  | -2,755 | 1,134 | -4,461 | -4,051 | -2,755 | -1,696 | -1,440 |
| <b>109</b> | 0,517  | -2,704 | 1,133 | -4,379 | -3,976 | -2,704 | -1,662 | -1,409 |
| <b>110</b> | 0,523  | -2,653 | 1,132 | -4,296 | -3,902 | -2,653 | -1,628 | -1,379 |
| <b>111</b> | 0,530  | -2,602 | 1,131 | -4,214 | -3,828 | -2,602 | -1,594 | -1,349 |
| <b>112</b> | 0,536  | -2,551 | 1,129 | -4,133 | -3,755 | -2,551 | -1,560 | -1,318 |
| <b>113</b> | 0,542  | -2,501 | 1,127 | -4,053 | -3,682 | -2,501 | -1,525 | -1,287 |
| <b>114</b> | 0,548  | -2,450 | 1,125 | -3,974 | -3,610 | -2,450 | -1,490 | -1,255 |
| <b>115</b> | 0,555  | -2,399 | 1,121 | -3,897 | -3,540 | -2,399 | -1,454 | -1,223 |
| <b>116</b> | 0,561  | -2,349 | 1,116 | -3,822 | -3,470 | -2,349 | -1,417 | -1,189 |
| <b>117</b> | 0,567  | -2,298 | 1,109 | -3,749 | -3,403 | -2,298 | -1,379 | -1,154 |
| <b>118</b> | 0,573  | -2,248 | 1,101 | -3,678 | -3,338 | -2,248 | -1,340 | -1,118 |
| <b>119</b> | 0,580  | -2,198 | 1,090 | -3,611 | -3,275 | -2,198 | -1,300 | -1,080 |
| <b>120</b> | 0,586  | -2,148 | 1,078 | -3,547 | -3,215 | -2,148 | -1,258 | -1,041 |
| <b>121</b> | 0,592  | -2,098 | 1,064 | -3,486 | -3,156 | -2,098 | -1,216 | -1,000 |
| <b>122</b> | 0,599  | -2,048 | 1,048 | -3,426 | -3,098 | -2,048 | -1,173 | -0,959 |
| <b>123</b> | 0,605  | -1,999 | 1,031 | -3,368 | -3,042 | -1,999 | -1,130 | -0,918 |
| <b>124</b> | 0,611  | -1,950 | 1,013 | -3,311 | -2,988 | -1,950 | -1,086 | -0,875 |
| <b>125</b> | 0,617  | -1,902 | 0,994 | -3,256 | -2,935 | -1,902 | -1,042 | -0,833 |
| <b>126</b> | 0,624  | -1,853 | 0,974 | -3,202 | -2,881 | -1,853 | -0,998 | -0,791 |
| <b>127</b> | 0,630  | -1,805 | 0,956 | -3,145 | -2,827 | -1,805 | -0,956 | -0,750 |
| <b>128</b> | 0,636  | -1,758 | 0,940 | -3,084 | -2,769 | -1,758 | -0,917 | -0,713 |
| <b>129</b> | 0,642  | -1,711 | 0,926 | -3,020 | -2,709 | -1,711 | -0,880 | -0,679 |
| <b>130</b> | 0,649  | -1,664 | 0,915 | -2,953 | -2,648 | -1,664 | -0,845 | -0,647 |
| <b>131</b> | 0,655  | -1,618 | 0,905 | -2,885 | -2,585 | -1,618 | -0,812 | -0,617 |
| <b>132</b> | 0,661  | -1,573 | 0,896 | -2,815 | -2,521 | -1,573 | -0,781 | -0,589 |
| <b>133</b> | 0,667  | -1,528 | 0,888 | -2,746 | -2,458 | -1,528 | -0,750 | -0,562 |
| <b>134</b> | 0,674  | -1,484 | 0,880 | -2,676 | -2,395 | -1,484 | -0,721 | -0,536 |



|     |       |        |       |        |        |        |        |        |
|-----|-------|--------|-------|--------|--------|--------|--------|--------|
| 135 | 0,680 | -1,441 | 0,872 | -2,608 | -2,333 | -1,441 | -0,692 | -0,510 |
| 136 | 0,686 | -1,398 | 0,864 | -2,541 | -2,271 | -1,398 | -0,663 | -0,484 |
| 137 | 0,693 | -1,356 | 0,855 | -2,475 | -2,211 | -1,356 | -0,634 | -0,459 |
| 138 | 0,699 | -1,314 | 0,846 | -2,410 | -2,152 | -1,314 | -0,607 | -0,435 |
| 139 | 0,705 | -1,273 | 0,838 | -2,344 | -2,092 | -1,273 | -0,580 | -0,411 |
| 140 | 0,711 | -1,233 | 0,832 | -2,277 | -2,032 | -1,233 | -0,555 | -0,390 |
| 141 | 0,718 | -1,193 | 0,826 | -2,210 | -1,971 | -1,193 | -0,531 | -0,370 |
| 142 | 0,724 | -1,154 | 0,823 | -2,142 | -1,910 | -1,154 | -0,508 | -0,351 |
| 143 | 0,730 | -1,115 | 0,820 | -2,074 | -1,850 | -1,115 | -0,487 | -0,333 |
| 144 | 0,736 | -1,078 | 0,818 | -2,007 | -1,790 | -1,078 | -0,467 | -0,317 |
| 145 | 0,743 | -1,041 | 0,817 | -1,941 | -1,731 | -1,041 | -0,448 | -0,302 |
| 146 | 0,749 | -1,006 | 0,817 | -1,875 | -1,673 | -1,006 | -0,429 | -0,287 |
| 147 | 0,755 | -0,971 | 0,817 | -1,811 | -1,616 | -0,971 | -0,412 | -0,273 |
| 148 | 0,761 | -0,937 | 0,817 | -1,750 | -1,561 | -0,937 | -0,395 | -0,260 |
| 149 | 0,768 | -0,905 | 0,816 | -1,690 | -1,508 | -0,905 | -0,378 | -0,247 |
| 150 | 0,774 | -0,873 | 0,815 | -1,634 | -1,457 | -0,873 | -0,361 | -0,233 |
| 151 | 0,780 | -0,842 | 0,812 | -1,580 | -1,409 | -0,842 | -0,344 | -0,220 |
| 152 | 0,787 | -0,813 | 0,808 | -1,528 | -1,363 | -0,813 | -0,328 | -0,206 |
| 153 | 0,793 | -0,784 | 0,804 | -1,479 | -1,319 | -0,784 | -0,311 | -0,193 |
| 154 | 0,799 | -0,757 | 0,799 | -1,432 | -1,276 | -0,757 | -0,296 | -0,180 |
| 155 | 0,805 | -0,730 | 0,794 | -1,386 | -1,235 | -0,730 | -0,280 | -0,167 |
| 156 | 0,812 | -0,704 | 0,791 | -1,340 | -1,194 | -0,704 | -0,266 | -0,155 |
| 157 | 0,818 | -0,678 | 0,788 | -1,295 | -1,153 | -0,678 | -0,252 | -0,145 |
| 158 | 0,824 | -0,653 | 0,786 | -1,250 | -1,113 | -0,653 | -0,240 | -0,135 |
| 159 | 0,830 | -0,629 | 0,786 | -1,205 | -1,073 | -0,629 | -0,228 | -0,126 |
| 160 | 0,837 | -0,605 | 0,789 | -1,160 | -1,033 | -0,605 | -0,218 | -0,118 |
| 161 | 0,843 | -0,582 | 0,795 | -1,115 | -0,993 | -0,582 | -0,208 | -0,112 |
| 162 | 0,849 | -0,560 | 0,803 | -1,069 | -0,953 | -0,560 | -0,200 | -0,108 |
| 163 | 0,855 | -0,538 | 0,816 | -1,024 | -0,913 | -0,538 | -0,194 | -0,105 |
| 164 | 0,862 | -0,517 | 0,832 | -0,977 | -0,873 | -0,517 | -0,189 | -0,103 |
| 165 | 0,868 | -0,496 | 0,853 | -0,931 | -0,833 | -0,496 | -0,185 | -0,103 |
| 166 | 0,874 | -0,476 | 0,878 | -0,885 | -0,792 | -0,476 | -0,182 | -0,104 |
| 167 | 0,881 | -0,457 | 0,908 | -0,839 | -0,753 | -0,457 | -0,179 | -0,106 |
| 168 | 0,887 | -0,438 | 0,941 | -0,795 | -0,714 | -0,438 | -0,178 | -0,108 |
| 169 | 0,893 | -0,420 | 0,977 | -0,751 | -0,677 | -0,420 | -0,177 | -0,111 |
| 170 | 0,899 | -0,403 | 1,016 | -0,710 | -0,641 | -0,403 | -0,176 | -0,114 |
| 171 | 0,906 | -0,386 | 1,057 | -0,670 | -0,606 | -0,386 | -0,175 | -0,117 |
| 172 | 0,912 | -0,370 | 1,100 | -0,632 | -0,574 | -0,370 | -0,174 | -0,120 |
| 173 | 0,918 | -0,354 | 1,143 | -0,597 | -0,542 | -0,354 | -0,172 | -0,122 |
| 174 | 0,924 | -0,339 | 1,187 | -0,563 | -0,513 | -0,339 | -0,170 | -0,124 |
| 175 | 0,931 | -0,325 | 1,232 | -0,531 | -0,485 | -0,325 | -0,168 | -0,125 |
| 176 | 0,937 | -0,311 | 1,278 | -0,502 | -0,459 | -0,311 | -0,166 | -0,126 |
| 177 | 0,943 | -0,297 | 1,323 | -0,473 | -0,434 | -0,297 | -0,163 | -0,126 |
| 178 | 0,949 | -0,284 | 1,369 | -0,446 | -0,410 | -0,284 | -0,160 | -0,125 |
| 179 | 0,956 | -0,271 | 1,415 | -0,421 | -0,387 | -0,271 | -0,156 | -0,124 |
| 180 | 0,962 | -0,258 | 1,461 | -0,396 | -0,365 | -0,258 | -0,152 | -0,123 |

|            |       |        |       |        |        |        |        |        |
|------------|-------|--------|-------|--------|--------|--------|--------|--------|
| <b>181</b> | 0,968 | -0,245 | 1,507 | -0,372 | -0,344 | -0,245 | -0,148 | -0,120 |
| <b>182</b> | 0,975 | -0,233 | 1,553 | -0,349 | -0,323 | -0,233 | -0,143 | -0,117 |
| <b>183</b> | 0,981 | -0,220 | 1,600 | -0,326 | -0,303 | -0,220 | -0,137 | -0,114 |

Table S12: Look up table for X<sub>insp</sub> at 8 Hz for female children and adolescents. Height in cm; 5<sup>th</sup>, 10<sup>th</sup>, 50<sup>th</sup>, 90<sup>th</sup> and 95<sup>th</sup> percentile. Since X occurs in the range of negative values X parameters were shifted with the following function:  $f(x) = X * (-1) + 0.1$

Table S13 shows the created reference values for male children and adolescents for the parameter X<sub>tot</sub> at 8 Hz in the form of a look up table.

| <b>Height</b> | <b>lambda</b> | <b>mu</b> | <b>sigma</b> | <b>5%</b> | <b>10%</b> | <b>50%</b> | <b>90%</b> | <b>95%</b> |
|---------------|---------------|-----------|--------------|-----------|------------|------------|------------|------------|
| <b>101</b>    | -0,151        | -3,621    | 1,121        | -6,410    | -5,629     | -3,621     | -2,381     | -2,122     |
| <b>102</b>    | -0,144        | -3,564    | 1,113        | -6,330    | -5,556     | -3,564     | -2,335     | -2,077     |
| <b>103</b>    | -0,137        | -3,507    | 1,106        | -6,250    | -5,483     | -3,507     | -2,288     | -2,034     |
| <b>104</b>    | -0,130        | -3,450    | 1,098        | -6,170    | -5,409     | -3,450     | -2,242     | -1,990     |
| <b>105</b>    | -0,123        | -3,393    | 1,091        | -6,089    | -5,335     | -3,393     | -2,196     | -1,947     |
| <b>106</b>    | -0,116        | -3,336    | 1,084        | -6,008    | -5,261     | -3,336     | -2,151     | -1,904     |
| <b>107</b>    | -0,108        | -3,279    | 1,076        | -5,925    | -5,186     | -3,279     | -2,105     | -1,861     |
| <b>108</b>    | -0,101        | -3,222    | 1,069        | -5,843    | -5,111     | -3,222     | -2,060     | -1,818     |
| <b>109</b>    | -0,094        | -3,165    | 1,062        | -5,760    | -5,035     | -3,165     | -2,015     | -1,776     |
| <b>110</b>    | -0,087        | -3,108    | 1,054        | -5,676    | -4,959     | -3,108     | -1,970     | -1,734     |
| <b>111</b>    | -0,080        | -3,051    | 1,047        | -5,591    | -4,883     | -3,051     | -1,925     | -1,692     |
| <b>112</b>    | -0,073        | -2,994    | 1,039        | -5,507    | -4,806     | -2,994     | -1,881     | -1,650     |
| <b>113</b>    | -0,065        | -2,937    | 1,032        | -5,421    | -4,729     | -2,937     | -1,837     | -1,609     |
| <b>114</b>    | -0,058        | -2,880    | 1,025        | -5,335    | -4,651     | -2,880     | -1,793     | -1,568     |
| <b>115</b>    | -0,051        | -2,824    | 1,017        | -5,248    | -4,573     | -2,824     | -1,749     | -1,527     |
| <b>116</b>    | -0,044        | -2,767    | 1,010        | -5,161    | -4,494     | -2,767     | -1,706     | -1,487     |
| <b>117</b>    | -0,037        | -2,710    | 1,002        | -5,073    | -4,415     | -2,710     | -1,663     | -1,447     |
| <b>118</b>    | -0,030        | -2,653    | 0,995        | -4,985    | -4,336     | -2,653     | -1,620     | -1,407     |
| <b>119</b>    | -0,022        | -2,596    | 0,988        | -4,896    | -4,257     | -2,596     | -1,577     | -1,367     |
| <b>120</b>    | -0,015        | -2,540    | 0,980        | -4,807    | -4,177     | -2,540     | -1,535     | -1,328     |
| <b>121</b>    | -0,008        | -2,483    | 0,973        | -4,717    | -4,097     | -2,483     | -1,493     | -1,289     |
| <b>122</b>    | -0,001        | -2,427    | 0,966        | -4,628    | -4,017     | -2,427     | -1,451     | -1,251     |
| <b>123</b>    | 0,006         | -2,371    | 0,958        | -4,538    | -3,936     | -2,371     | -1,410     | -1,213     |
| <b>124</b>    | 0,014         | -2,315    | 0,951        | -4,448    | -3,856     | -2,315     | -1,369     | -1,176     |
| <b>125</b>    | 0,021         | -2,260    | 0,943        | -4,358    | -3,777     | -2,260     | -1,329     | -1,139     |
| <b>126</b>    | 0,028         | -2,205    | 0,936        | -4,269    | -3,697     | -2,205     | -1,290     | -1,102     |
| <b>127</b>    | 0,035         | -2,151    | 0,929        | -4,180    | -3,619     | -2,151     | -1,251     | -1,067     |
| <b>128</b>    | 0,042         | -2,098    | 0,921        | -4,092    | -3,541     | -2,098     | -1,212     | -1,032     |
| <b>129</b>    | 0,049         | -2,045    | 0,914        | -4,006    | -3,464     | -2,045     | -1,175     | -0,997     |
| <b>130</b>    | 0,057         | -1,994    | 0,907        | -3,920    | -3,388     | -1,994     | -1,138     | -0,964     |
| <b>131</b>    | 0,064         | -1,943    | 0,899        | -3,836    | -3,313     | -1,943     | -1,102     | -0,931     |
| <b>132</b>    | 0,071         | -1,894    | 0,892        | -3,752    | -3,240     | -1,894     | -1,067     | -0,899     |
| <b>133</b>    | 0,078         | -1,845    | 0,884        | -3,670    | -3,167     | -1,845     | -1,033     | -0,868     |
| <b>134</b>    | 0,085         | -1,797    | 0,877        | -3,590    | -3,096     | -1,797     | -0,999     | -0,837     |

|     |       |        |       |        |        |        |        |        |
|-----|-------|--------|-------|--------|--------|--------|--------|--------|
| 135 | 0,092 | -1,750 | 0,870 | -3,510 | -3,025 | -1,750 | -0,967 | -0,808 |
| 136 | 0,100 | -1,704 | 0,862 | -3,431 | -2,956 | -1,704 | -0,934 | -0,778 |
| 137 | 0,107 | -1,659 | 0,855 | -3,354 | -2,888 | -1,659 | -0,903 | -0,750 |
| 138 | 0,114 | -1,615 | 0,847 | -3,278 | -2,821 | -1,615 | -0,873 | -0,722 |
| 139 | 0,121 | -1,572 | 0,840 | -3,203 | -2,756 | -1,572 | -0,843 | -0,696 |
| 140 | 0,128 | -1,529 | 0,833 | -3,130 | -2,691 | -1,529 | -0,814 | -0,670 |
| 141 | 0,135 | -1,488 | 0,825 | -3,059 | -2,629 | -1,488 | -0,786 | -0,644 |
| 142 | 0,143 | -1,448 | 0,818 | -2,989 | -2,567 | -1,448 | -0,759 | -0,620 |
| 143 | 0,150 | -1,409 | 0,811 | -2,921 | -2,507 | -1,409 | -0,732 | -0,596 |
| 144 | 0,157 | -1,371 | 0,803 | -2,854 | -2,449 | -1,371 | -0,706 | -0,572 |
| 145 | 0,164 | -1,334 | 0,796 | -2,788 | -2,391 | -1,334 | -0,681 | -0,550 |
| 146 | 0,171 | -1,297 | 0,788 | -2,724 | -2,335 | -1,297 | -0,656 | -0,528 |
| 147 | 0,178 | -1,261 | 0,781 | -2,660 | -2,279 | -1,261 | -0,632 | -0,506 |
| 148 | 0,186 | -1,226 | 0,774 | -2,597 | -2,224 | -1,226 | -0,609 | -0,485 |
| 149 | 0,193 | -1,192 | 0,766 | -2,535 | -2,170 | -1,192 | -0,586 | -0,465 |
| 150 | 0,200 | -1,158 | 0,759 | -2,474 | -2,117 | -1,158 | -0,564 | -0,445 |
| 151 | 0,207 | -1,125 | 0,752 | -2,414 | -2,064 | -1,125 | -0,542 | -0,426 |
| 152 | 0,214 | -1,092 | 0,744 | -2,355 | -2,013 | -1,092 | -0,521 | -0,407 |
| 153 | 0,221 | -1,060 | 0,737 | -2,297 | -1,962 | -1,060 | -0,500 | -0,388 |
| 154 | 0,229 | -1,029 | 0,729 | -2,240 | -1,913 | -1,029 | -0,480 | -0,371 |
| 155 | 0,236 | -0,998 | 0,722 | -2,184 | -1,863 | -0,998 | -0,460 | -0,353 |
| 156 | 0,243 | -0,968 | 0,715 | -2,128 | -1,815 | -0,968 | -0,441 | -0,336 |
| 157 | 0,250 | -0,938 | 0,707 | -2,072 | -1,766 | -0,938 | -0,422 | -0,319 |
| 158 | 0,257 | -0,908 | 0,700 | -2,016 | -1,718 | -0,908 | -0,403 | -0,303 |
| 159 | 0,264 | -0,878 | 0,692 | -1,960 | -1,669 | -0,878 | -0,385 | -0,287 |
| 160 | 0,272 | -0,848 | 0,685 | -1,903 | -1,620 | -0,848 | -0,366 | -0,271 |
| 161 | 0,279 | -0,819 | 0,678 | -1,846 | -1,570 | -0,819 | -0,348 | -0,255 |
| 162 | 0,286 | -0,788 | 0,670 | -1,788 | -1,520 | -0,788 | -0,330 | -0,239 |
| 163 | 0,293 | -0,758 | 0,663 | -1,730 | -1,470 | -0,758 | -0,312 | -0,224 |
| 164 | 0,300 | -0,728 | 0,656 | -1,670 | -1,418 | -0,728 | -0,294 | -0,209 |
| 165 | 0,307 | -0,697 | 0,648 | -1,610 | -1,366 | -0,697 | -0,276 | -0,194 |
| 166 | 0,315 | -0,667 | 0,641 | -1,550 | -1,314 | -0,667 | -0,259 | -0,179 |
| 167 | 0,322 | -0,636 | 0,633 | -1,489 | -1,262 | -0,636 | -0,242 | -0,164 |
| 168 | 0,329 | -0,606 | 0,626 | -1,428 | -1,209 | -0,606 | -0,225 | -0,150 |
| 169 | 0,336 | -0,576 | 0,619 | -1,367 | -1,157 | -0,576 | -0,208 | -0,136 |
| 170 | 0,343 | -0,546 | 0,611 | -1,307 | -1,105 | -0,546 | -0,192 | -0,123 |
| 171 | 0,350 | -0,517 | 0,604 | -1,248 | -1,054 | -0,517 | -0,176 | -0,109 |
| 172 | 0,358 | -0,488 | 0,597 | -1,189 | -1,004 | -0,488 | -0,161 | -0,097 |
| 173 | 0,365 | -0,460 | 0,589 | -1,131 | -0,954 | -0,460 | -0,146 | -0,085 |
| 174 | 0,372 | -0,432 | 0,582 | -1,073 | -0,904 | -0,432 | -0,131 | -0,073 |
| 175 | 0,379 | -0,404 | 0,574 | -1,015 | -0,854 | -0,404 | -0,117 | -0,061 |
| 176 | 0,386 | -0,377 | 0,567 | -0,957 | -0,805 | -0,377 | -0,103 | -0,050 |
| 177 | 0,393 | -0,349 | 0,560 | -0,899 | -0,755 | -0,349 | -0,089 | -0,039 |
| 178 | 0,401 | -0,321 | 0,552 | -0,840 | -0,704 | -0,321 | -0,076 | -0,028 |
| 179 | 0,408 | -0,293 | 0,545 | -0,781 | -0,653 | -0,293 | -0,062 | -0,018 |
| 180 | 0,415 | -0,265 | 0,537 | -0,720 | -0,601 | -0,265 | -0,049 | -0,007 |

|            |       |        |       |        |        |        |        |       |
|------------|-------|--------|-------|--------|--------|--------|--------|-------|
| <b>181</b> | 0,422 | -0,237 | 0,530 | -0,659 | -0,549 | -0,237 | -0,036 | 0,003 |
| <b>182</b> | 0,429 | -0,209 | 0,523 | -0,598 | -0,496 | -0,209 | -0,023 | 0,013 |
| <b>183</b> | 0,437 | -0,181 | 0,515 | -0,536 | -0,443 | -0,181 | -0,011 | 0,022 |

Table S13: Look up table for Xtot at 8 Hz for male children and adolescents. Height in cm; 5<sup>th</sup>, 10<sup>th</sup>, 50<sup>th</sup>, 90<sup>th</sup> and 95<sup>th</sup> percentile. Since X occurs in the range of negative values X parameters were shifted with the following function:  $f(x) = X * (-1) + 0.1$

Table S14 shows the created reference values for female children and adolescents for the parameter Xtot at 8 Hz in the form of a look up table.

| Height     | lambda | mu     | sigma | 5%     | 10%    | 50%    | 90%    | 95%    |
|------------|--------|--------|-------|--------|--------|--------|--------|--------|
| <b>101</b> | 0,343  | -3,547 | 1,235 | -5,579 | -5,079 | -3,547 | -2,348 | -2,063 |
| <b>102</b> | 0,343  | -3,493 | 1,229 | -5,510 | -5,013 | -3,493 | -2,305 | -2,023 |
| <b>103</b> | 0,344  | -3,439 | 1,222 | -5,440 | -4,947 | -3,439 | -2,261 | -1,983 |
| <b>104</b> | 0,344  | -3,385 | 1,215 | -5,371 | -4,881 | -3,385 | -2,218 | -1,943 |
| <b>105</b> | 0,345  | -3,331 | 1,209 | -5,301 | -4,815 | -3,331 | -2,176 | -1,903 |
| <b>106</b> | 0,346  | -3,277 | 1,202 | -5,230 | -4,748 | -3,277 | -2,133 | -1,863 |
| <b>107</b> | 0,346  | -3,222 | 1,195 | -5,160 | -4,681 | -3,222 | -2,091 | -1,824 |
| <b>108</b> | 0,347  | -3,168 | 1,188 | -5,088 | -4,614 | -3,168 | -2,048 | -1,785 |
| <b>109</b> | 0,347  | -3,114 | 1,182 | -5,017 | -4,546 | -3,114 | -2,006 | -1,746 |
| <b>110</b> | 0,348  | -3,060 | 1,175 | -4,945 | -4,479 | -3,060 | -1,965 | -1,707 |
| <b>111</b> | 0,348  | -3,006 | 1,168 | -4,873 | -4,411 | -3,006 | -1,923 | -1,669 |
| <b>112</b> | 0,349  | -2,952 | 1,161 | -4,802 | -4,344 | -2,952 | -1,880 | -1,630 |
| <b>113</b> | 0,349  | -2,898 | 1,153 | -4,731 | -4,277 | -2,898 | -1,838 | -1,590 |
| <b>114</b> | 0,350  | -2,843 | 1,144 | -4,661 | -4,211 | -2,843 | -1,795 | -1,550 |
| <b>115</b> | 0,350  | -2,789 | 1,135 | -4,593 | -4,145 | -2,789 | -1,752 | -1,510 |
| <b>116</b> | 0,351  | -2,735 | 1,124 | -4,527 | -4,082 | -2,735 | -1,707 | -1,468 |
| <b>117</b> | 0,351  | -2,681 | 1,112 | -4,463 | -4,020 | -2,681 | -1,662 | -1,426 |
| <b>118</b> | 0,352  | -2,626 | 1,098 | -4,402 | -3,960 | -2,626 | -1,616 | -1,382 |
| <b>119</b> | 0,352  | -2,572 | 1,083 | -4,343 | -3,901 | -2,572 | -1,569 | -1,338 |
| <b>120</b> | 0,353  | -2,518 | 1,066 | -4,287 | -3,845 | -2,518 | -1,521 | -1,292 |
| <b>121</b> | 0,353  | -2,464 | 1,048 | -4,234 | -3,791 | -2,464 | -1,472 | -1,246 |
| <b>122</b> | 0,354  | -2,410 | 1,029 | -4,183 | -3,739 | -2,410 | -1,423 | -1,198 |
| <b>123</b> | 0,354  | -2,357 | 1,007 | -4,135 | -3,688 | -2,357 | -1,373 | -1,150 |
| <b>124</b> | 0,355  | -2,303 | 0,986 | -4,088 | -3,638 | -2,303 | -1,323 | -1,103 |
| <b>125</b> | 0,356  | -2,250 | 0,963 | -4,042 | -3,589 | -2,250 | -1,273 | -1,055 |
| <b>126</b> | 0,356  | -2,197 | 0,940 | -3,996 | -3,540 | -2,197 | -1,224 | -1,008 |
| <b>127</b> | 0,357  | -2,144 | 0,919 | -3,946 | -3,489 | -2,144 | -1,176 | -0,963 |
| <b>128</b> | 0,357  | -2,091 | 0,901 | -3,889 | -3,432 | -2,091 | -1,132 | -0,921 |
| <b>129</b> | 0,358  | -2,039 | 0,887 | -3,823 | -3,368 | -2,039 | -1,091 | -0,884 |
| <b>130</b> | 0,358  | -1,986 | 0,878 | -3,744 | -3,296 | -1,986 | -1,056 | -0,853 |
| <b>131</b> | 0,359  | -1,934 | 0,875 | -3,654 | -3,215 | -1,934 | -1,024 | -0,826 |
| <b>132</b> | 0,359  | -1,882 | 0,877 | -3,554 | -3,127 | -1,882 | -0,997 | -0,804 |
| <b>133</b> | 0,360  | -1,830 | 0,883 | -3,447 | -3,035 | -1,830 | -0,972 | -0,784 |

|     |       |        |       |        |        |        |        |        |
|-----|-------|--------|-------|--------|--------|--------|--------|--------|
| 134 | 0,360 | -1,778 | 0,890 | -3,338 | -2,941 | -1,778 | -0,948 | -0,766 |
| 135 | 0,361 | -1,726 | 0,898 | -3,228 | -2,847 | -1,726 | -0,924 | -0,748 |
| 136 | 0,361 | -1,675 | 0,906 | -3,121 | -2,754 | -1,675 | -0,900 | -0,730 |
| 137 | 0,362 | -1,624 | 0,912 | -3,016 | -2,663 | -1,624 | -0,875 | -0,710 |
| 138 | 0,362 | -1,573 | 0,917 | -2,917 | -2,576 | -1,573 | -0,849 | -0,689 |
| 139 | 0,363 | -1,522 | 0,918 | -2,823 | -2,494 | -1,522 | -0,821 | -0,666 |
| 140 | 0,363 | -1,472 | 0,917 | -2,734 | -2,414 | -1,472 | -0,791 | -0,641 |
| 141 | 0,364 | -1,422 | 0,912 | -2,650 | -2,339 | -1,422 | -0,761 | -0,615 |
| 142 | 0,365 | -1,372 | 0,905 | -2,571 | -2,267 | -1,372 | -0,729 | -0,587 |
| 143 | 0,365 | -1,324 | 0,896 | -2,495 | -2,198 | -1,324 | -0,697 | -0,559 |
| 144 | 0,366 | -1,276 | 0,884 | -2,424 | -2,132 | -1,276 | -0,664 | -0,530 |
| 145 | 0,366 | -1,229 | 0,872 | -2,354 | -2,067 | -1,229 | -0,632 | -0,502 |
| 146 | 0,367 | -1,183 | 0,861 | -2,284 | -2,003 | -1,183 | -0,601 | -0,475 |
| 147 | 0,367 | -1,139 | 0,850 | -2,215 | -1,940 | -1,139 | -0,572 | -0,449 |
| 148 | 0,368 | -1,095 | 0,839 | -2,147 | -1,878 | -1,095 | -0,543 | -0,424 |
| 149 | 0,368 | -1,053 | 0,829 | -2,080 | -1,817 | -1,053 | -0,516 | -0,401 |
| 150 | 0,369 | -1,012 | 0,819 | -2,015 | -1,758 | -1,012 | -0,490 | -0,378 |
| 151 | 0,369 | -0,972 | 0,809 | -1,951 | -1,700 | -0,972 | -0,465 | -0,356 |
| 152 | 0,370 | -0,934 | 0,798 | -1,890 | -1,645 | -0,934 | -0,441 | -0,335 |
| 153 | 0,370 | -0,898 | 0,787 | -1,833 | -1,592 | -0,898 | -0,417 | -0,315 |
| 154 | 0,371 | -0,863 | 0,774 | -1,778 | -1,543 | -0,863 | -0,394 | -0,295 |
| 155 | 0,371 | -0,829 | 0,761 | -1,727 | -1,495 | -0,829 | -0,372 | -0,276 |
| 156 | 0,372 | -0,797 | 0,747 | -1,678 | -1,451 | -0,797 | -0,351 | -0,257 |
| 157 | 0,372 | -0,766 | 0,732 | -1,632 | -1,408 | -0,766 | -0,330 | -0,239 |
| 158 | 0,373 | -0,736 | 0,718 | -1,587 | -1,367 | -0,736 | -0,310 | -0,222 |
| 159 | 0,373 | -0,708 | 0,704 | -1,543 | -1,326 | -0,708 | -0,292 | -0,206 |
| 160 | 0,374 | -0,680 | 0,693 | -1,499 | -1,286 | -0,680 | -0,275 | -0,192 |
| 161 | 0,375 | -0,654 | 0,683 | -1,455 | -1,247 | -0,654 | -0,260 | -0,179 |
| 162 | 0,375 | -0,630 | 0,676 | -1,411 | -1,208 | -0,630 | -0,245 | -0,167 |
| 163 | 0,376 | -0,606 | 0,670 | -1,367 | -1,169 | -0,606 | -0,233 | -0,157 |
| 164 | 0,376 | -0,583 | 0,667 | -1,323 | -1,130 | -0,583 | -0,221 | -0,148 |
| 165 | 0,377 | -0,562 | 0,667 | -1,277 | -1,091 | -0,562 | -0,211 | -0,140 |
| 166 | 0,377 | -0,541 | 0,670 | -1,230 | -1,051 | -0,541 | -0,202 | -0,133 |
| 167 | 0,378 | -0,520 | 0,677 | -1,182 | -1,010 | -0,520 | -0,194 | -0,127 |
| 168 | 0,378 | -0,500 | 0,688 | -1,132 | -0,968 | -0,500 | -0,187 | -0,123 |
| 169 | 0,379 | -0,481 | 0,703 | -1,081 | -0,926 | -0,481 | -0,181 | -0,119 |
| 170 | 0,379 | -0,462 | 0,721 | -1,030 | -0,883 | -0,462 | -0,176 | -0,117 |
| 171 | 0,380 | -0,444 | 0,741 | -0,980 | -0,842 | -0,444 | -0,171 | -0,114 |
| 172 | 0,380 | -0,426 | 0,762 | -0,930 | -0,801 | -0,426 | -0,167 | -0,112 |
| 173 | 0,381 | -0,408 | 0,785 | -0,882 | -0,761 | -0,408 | -0,162 | -0,110 |
| 174 | 0,381 | -0,391 | 0,809 | -0,836 | -0,722 | -0,391 | -0,158 | -0,108 |
| 175 | 0,382 | -0,374 | 0,834 | -0,791 | -0,685 | -0,374 | -0,153 | -0,106 |
| 176 | 0,382 | -0,357 | 0,859 | -0,748 | -0,649 | -0,357 | -0,149 | -0,103 |
| 177 | 0,383 | -0,341 | 0,885 | -0,707 | -0,614 | -0,341 | -0,144 | -0,101 |
| 178 | 0,384 | -0,325 | 0,911 | -0,667 | -0,581 | -0,325 | -0,139 | -0,098 |
| 179 | 0,384 | -0,309 | 0,937 | -0,628 | -0,548 | -0,309 | -0,134 | -0,095 |

|            |       |        |       |        |        |        |        |        |
|------------|-------|--------|-------|--------|--------|--------|--------|--------|
| <b>180</b> | 0,385 | -0,294 | 0,963 | -0,591 | -0,517 | -0,294 | -0,129 | -0,092 |
| <b>181</b> | 0,385 | -0,278 | 0,989 | -0,555 | -0,486 | -0,278 | -0,123 | -0,088 |
| <b>182</b> | 0,386 | -0,263 | 1,016 | -0,520 | -0,456 | -0,263 | -0,117 | -0,084 |
| <b>183</b> | 0,386 | -0,247 | 1,043 | -0,485 | -0,426 | -0,247 | -0,111 | -0,080 |

Table S14: Look up table for X<sub>tot</sub> at 8 Hz for female children and adolescents. Height in cm; 5<sup>th</sup>, 10<sup>th</sup>, 50<sup>th</sup>, 90<sup>th</sup> and 95<sup>th</sup> percentile. Since X occurs in the range of negative values X parameters were shifted with the following function:  $f(x) = X * (-1) + 0.1$

Table S15 shows the created reference values for male children and adolescents for the parameter Z<sub>tot</sub> at 8 Hz in the form of a look up table.

| Height     | lambda | mu     | sigma | 5%    | 10%   | 50%    | 90%    | 95%    |
|------------|--------|--------|-------|-------|-------|--------|--------|--------|
| <b>101</b> | -0,033 | 10,086 | 1,920 | 7,931 | 8,362 | 10,086 | 12,179 | 12,850 |
| <b>102</b> | -0,053 | 9,990  | 1,907 | 7,836 | 8,265 | 9,990  | 12,097 | 12,776 |
| <b>103</b> | -0,072 | 9,894  | 1,894 | 7,741 | 8,169 | 9,894  | 12,016 | 12,702 |
| <b>104</b> | -0,092 | 9,798  | 1,881 | 7,646 | 8,073 | 9,798  | 11,934 | 12,629 |
| <b>105</b> | -0,111 | 9,702  | 1,868 | 7,552 | 7,977 | 9,702  | 11,853 | 12,556 |
| <b>106</b> | -0,131 | 9,607  | 1,855 | 7,458 | 7,881 | 9,607  | 11,772 | 12,483 |
| <b>107</b> | -0,150 | 9,511  | 1,842 | 7,364 | 7,785 | 9,511  | 11,691 | 12,410 |
| <b>108</b> | -0,170 | 9,415  | 1,829 | 7,270 | 7,690 | 9,415  | 11,610 | 12,338 |
| <b>109</b> | -0,189 | 9,319  | 1,816 | 7,177 | 7,595 | 9,319  | 11,529 | 12,265 |
| <b>110</b> | -0,209 | 9,223  | 1,803 | 7,085 | 7,500 | 9,223  | 11,448 | 12,194 |
| <b>111</b> | -0,228 | 9,127  | 1,790 | 6,992 | 7,406 | 9,127  | 11,367 | 12,122 |
| <b>112</b> | -0,248 | 9,032  | 1,777 | 6,900 | 7,312 | 9,032  | 11,287 | 12,051 |
| <b>113</b> | -0,267 | 8,936  | 1,764 | 6,809 | 7,218 | 8,936  | 11,206 | 11,980 |
| <b>114</b> | -0,286 | 8,840  | 1,751 | 6,717 | 7,124 | 8,840  | 11,126 | 11,909 |
| <b>115</b> | -0,305 | 8,744  | 1,738 | 6,626 | 7,030 | 8,744  | 11,044 | 11,838 |
| <b>116</b> | -0,322 | 8,647  | 1,725 | 6,534 | 6,937 | 8,647  | 10,963 | 11,766 |
| <b>117</b> | -0,337 | 8,551  | 1,712 | 6,443 | 6,843 | 8,551  | 10,880 | 11,693 |
| <b>118</b> | -0,350 | 8,454  | 1,699 | 6,351 | 6,749 | 8,454  | 10,797 | 11,618 |
| <b>119</b> | -0,359 | 8,357  | 1,686 | 6,258 | 6,654 | 8,357  | 10,711 | 11,541 |
| <b>120</b> | -0,366 | 8,259  | 1,673 | 6,164 | 6,558 | 8,259  | 10,624 | 11,460 |
| <b>121</b> | -0,368 | 8,160  | 1,660 | 6,070 | 6,462 | 8,160  | 10,533 | 11,376 |
| <b>122</b> | -0,367 | 8,061  | 1,648 | 5,974 | 6,365 | 8,061  | 10,440 | 11,287 |
| <b>123</b> | -0,360 | 7,961  | 1,635 | 5,877 | 6,267 | 7,961  | 10,343 | 11,193 |
| <b>124</b> | -0,350 | 7,859  | 1,623 | 5,779 | 6,168 | 7,859  | 10,242 | 11,093 |
| <b>125</b> | -0,334 | 7,757  | 1,611 | 5,679 | 6,068 | 7,757  | 10,138 | 10,987 |
| <b>126</b> | -0,312 | 7,655  | 1,598 | 5,578 | 5,966 | 7,655  | 10,030 | 10,875 |
| <b>127</b> | -0,284 | 7,551  | 1,587 | 5,475 | 5,864 | 7,551  | 9,917  | 10,756 |
| <b>128</b> | -0,249 | 7,448  | 1,575 | 5,371 | 5,760 | 7,448  | 9,800  | 10,631 |
| <b>129</b> | -0,205 | 7,344  | 1,563 | 5,265 | 5,656 | 7,344  | 9,679  | 10,498 |
| <b>130</b> | -0,153 | 7,241  | 1,552 | 5,157 | 5,550 | 7,241  | 9,554  | 10,358 |
| <b>131</b> | -0,091 | 7,138  | 1,541 | 5,047 | 5,444 | 7,138  | 9,425  | 10,211 |
| <b>132</b> | -0,021 | 7,036  | 1,530 | 4,935 | 5,336 | 7,036  | 9,293  | 10,059 |
| <b>133</b> | 0,055  | 6,935  | 1,520 | 4,822 | 5,228 | 6,935  | 9,159  | 9,902  |

|     |        |       |       |       |       |       |       |       |
|-----|--------|-------|-------|-------|-------|-------|-------|-------|
| 134 | 0,139  | 6,834 | 1,510 | 4,707 | 5,120 | 6,834 | 9,022 | 9,742 |
| 135 | 0,227  | 6,734 | 1,500 | 4,591 | 5,011 | 6,734 | 8,883 | 9,579 |
| 136 | 0,317  | 6,634 | 1,491 | 4,474 | 4,902 | 6,634 | 8,744 | 9,416 |
| 137 | 0,407  | 6,534 | 1,482 | 4,357 | 4,793 | 6,534 | 8,604 | 9,253 |
| 138 | 0,492  | 6,435 | 1,474 | 4,241 | 4,686 | 6,435 | 8,465 | 9,092 |
| 139 | 0,571  | 6,335 | 1,466 | 4,128 | 4,581 | 6,335 | 8,327 | 8,934 |
| 140 | 0,637  | 6,235 | 1,458 | 4,021 | 4,479 | 6,235 | 8,192 | 8,782 |
| 141 | 0,684  | 6,135 | 1,451 | 3,922 | 4,383 | 6,135 | 8,061 | 8,637 |
| 142 | 0,711  | 6,035 | 1,445 | 3,833 | 4,294 | 6,035 | 7,935 | 8,500 |
| 143 | 0,715  | 5,935 | 1,439 | 3,756 | 4,212 | 5,935 | 7,814 | 8,372 |
| 144 | 0,701  | 5,835 | 1,433 | 3,688 | 4,136 | 5,835 | 7,697 | 8,252 |
| 145 | 0,671  | 5,735 | 1,428 | 3,628 | 4,066 | 5,735 | 7,583 | 8,137 |
| 146 | 0,627  | 5,635 | 1,424 | 3,575 | 3,999 | 5,635 | 7,471 | 8,026 |
| 147 | 0,572  | 5,535 | 1,420 | 3,526 | 3,936 | 5,535 | 7,362 | 7,919 |
| 148 | 0,510  | 5,436 | 1,417 | 3,480 | 3,875 | 5,436 | 7,254 | 7,816 |
| 149 | 0,441  | 5,337 | 1,414 | 3,437 | 3,816 | 5,337 | 7,147 | 7,714 |
| 150 | 0,370  | 5,238 | 1,411 | 3,394 | 3,758 | 5,238 | 7,040 | 7,613 |
| 151 | 0,298  | 5,140 | 1,410 | 3,351 | 3,701 | 5,140 | 6,932 | 7,511 |
| 152 | 0,228  | 5,042 | 1,409 | 3,307 | 3,643 | 5,042 | 6,824 | 7,408 |
| 153 | 0,163  | 4,945 | 1,408 | 3,262 | 3,585 | 4,945 | 6,714 | 7,302 |
| 154 | 0,105  | 4,850 | 1,408 | 3,215 | 3,526 | 4,850 | 6,601 | 7,191 |
| 155 | 0,057  | 4,755 | 1,409 | 3,166 | 3,466 | 4,755 | 6,486 | 7,075 |
| 156 | 0,022  | 4,661 | 1,410 | 3,114 | 3,405 | 4,661 | 6,366 | 6,951 |
| 157 | 0,001  | 4,568 | 1,412 | 3,060 | 3,343 | 4,568 | 6,241 | 6,818 |
| 158 | -0,006 | 4,475 | 1,415 | 3,002 | 3,279 | 4,475 | 6,112 | 6,677 |
| 159 | -0,001 | 4,383 | 1,418 | 2,943 | 3,213 | 4,383 | 5,979 | 6,529 |
| 160 | 0,015  | 4,291 | 1,421 | 2,881 | 3,147 | 4,291 | 5,843 | 6,376 |
| 161 | 0,040  | 4,200 | 1,425 | 2,819 | 3,080 | 4,200 | 5,704 | 6,218 |
| 162 | 0,074  | 4,108 | 1,430 | 2,755 | 3,012 | 4,108 | 5,565 | 6,057 |
| 163 | 0,114  | 4,018 | 1,434 | 2,691 | 2,945 | 4,018 | 5,424 | 5,895 |
| 164 | 0,159  | 3,928 | 1,440 | 2,626 | 2,877 | 3,928 | 5,284 | 5,733 |
| 165 | 0,208  | 3,838 | 1,445 | 2,562 | 2,809 | 3,838 | 5,145 | 5,573 |
| 166 | 0,259  | 3,749 | 1,451 | 2,498 | 2,742 | 3,749 | 5,006 | 5,414 |
| 167 | 0,312  | 3,660 | 1,457 | 2,434 | 2,676 | 3,660 | 4,870 | 5,257 |
| 168 | 0,364  | 3,572 | 1,463 | 2,371 | 2,610 | 3,572 | 4,735 | 5,103 |
| 169 | 0,416  | 3,485 | 1,469 | 2,309 | 2,544 | 3,485 | 4,603 | 4,953 |
| 170 | 0,467  | 3,399 | 1,476 | 2,248 | 2,480 | 3,399 | 4,473 | 4,806 |
| 171 | 0,518  | 3,314 | 1,482 | 2,188 | 2,417 | 3,314 | 4,347 | 4,664 |
| 172 | 0,568  | 3,231 | 1,488 | 2,129 | 2,355 | 3,231 | 4,223 | 4,525 |
| 173 | 0,619  | 3,148 | 1,495 | 2,071 | 2,294 | 3,148 | 4,102 | 4,389 |
| 174 | 0,672  | 3,067 | 1,501 | 2,013 | 2,233 | 3,067 | 3,982 | 4,256 |
| 175 | 0,726  | 2,985 | 1,508 | 1,956 | 2,173 | 2,985 | 3,864 | 4,124 |
| 176 | 0,780  | 2,905 | 1,514 | 1,899 | 2,113 | 2,905 | 3,748 | 3,995 |
| 177 | 0,836  | 2,825 | 1,521 | 1,842 | 2,053 | 2,825 | 3,633 | 3,868 |
| 178 | 0,893  | 2,745 | 1,527 | 1,785 | 1,993 | 2,745 | 3,520 | 3,743 |
| 179 | 0,951  | 2,665 | 1,533 | 1,729 | 1,934 | 2,665 | 3,407 | 3,619 |



|            |       |       |       |       |       |       |       |       |
|------------|-------|-------|-------|-------|-------|-------|-------|-------|
| <b>180</b> | 1,009 | 2,586 | 1,540 | 1,672 | 1,874 | 2,586 | 3,296 | 3,497 |
| <b>181</b> | 1,067 | 2,506 | 1,546 | 1,616 | 1,815 | 2,506 | 3,185 | 3,376 |
| <b>182</b> | 1,125 | 2,427 | 1,552 | 1,560 | 1,756 | 2,427 | 3,076 | 3,256 |
| <b>183</b> | 1,184 | 2,348 | 1,559 | 1,504 | 1,697 | 2,348 | 2,967 | 3,138 |

Table S15: Look up table for  $Z_{tot}$  at 8 Hz for male children and adolescents. Height in cm; 5<sup>th</sup>, 10<sup>th</sup>, 50<sup>th</sup>, 90<sup>th</sup> and 95<sup>th</sup> percentile.

Table S16 shows the created reference values for female children and adolescents for the parameter  $Z_{tot}$  at 8 Hz in the form of a look up table.

| <b>Height</b> | <b>lambda</b> | <b>mu</b> | <b>sigma</b> | <b>5%</b> | <b>10%</b> | <b>50%</b> | <b>90%</b> | <b>95%</b> |
|---------------|---------------|-----------|--------------|-----------|------------|------------|------------|------------|
| <b>101</b>    | -0,345        | 10,028    | 1,687        | 7,508     | 7,984      | 10,028     | 12,842     | 13,831     |
| <b>102</b>    | -0,316        | 9,938     | 1,694        | 7,446     | 7,919      | 9,938      | 12,694     | 13,654     |
| <b>103</b>    | -0,286        | 9,849     | 1,701        | 7,384     | 7,853      | 9,849      | 12,547     | 13,481     |
| <b>104</b>    | -0,256        | 9,759     | 1,707        | 7,321     | 7,787      | 9,759      | 12,403     | 13,311     |
| <b>105</b>    | -0,226        | 9,670     | 1,713        | 7,257     | 7,719      | 9,670      | 12,261     | 13,146     |
| <b>106</b>    | -0,197        | 9,581     | 1,718        | 7,191     | 7,651      | 9,581      | 12,123     | 12,986     |
| <b>107</b>    | -0,167        | 9,492     | 1,722        | 7,124     | 7,581      | 9,492      | 11,988     | 12,830     |
| <b>108</b>    | -0,137        | 9,403     | 1,725        | 7,055     | 7,510      | 9,403      | 11,858     | 12,681     |
| <b>109</b>    | -0,107        | 9,314     | 1,727        | 6,984     | 7,437      | 9,314      | 11,731     | 12,537     |
| <b>110</b>    | -0,078        | 9,226     | 1,727        | 6,909     | 7,361      | 9,226      | 11,610     | 12,401     |
| <b>111</b>    | -0,048        | 9,137     | 1,726        | 6,831     | 7,282      | 9,137      | 11,494     | 12,272     |
| <b>112</b>    | -0,019        | 9,048     | 1,722        | 6,749     | 7,200      | 9,048      | 11,384     | 12,151     |
| <b>113</b>    | 0,010         | 8,960     | 1,716        | 6,662     | 7,113      | 8,960      | 11,280     | 12,039     |
| <b>114</b>    | 0,039         | 8,871     | 1,707        | 6,570     | 7,023      | 8,871      | 11,182     | 11,936     |
| <b>115</b>    | 0,068         | 8,783     | 1,695        | 6,474     | 6,929      | 8,783      | 11,091     | 11,841     |
| <b>116</b>    | 0,097         | 8,694     | 1,682        | 6,372     | 6,830      | 8,694      | 11,006     | 11,755     |
| <b>117</b>    | 0,125         | 8,605     | 1,665        | 6,265     | 6,728      | 8,605      | 10,926     | 11,676     |
| <b>118</b>    | 0,153         | 8,516     | 1,647        | 6,155     | 6,622      | 8,516      | 10,851     | 11,604     |
| <b>119</b>    | 0,181         | 8,428     | 1,628        | 6,042     | 6,515      | 8,428      | 10,779     | 11,535     |
| <b>120</b>    | 0,208         | 8,340     | 1,608        | 5,928     | 6,406      | 8,340      | 10,709     | 11,469     |
| <b>121</b>    | 0,235         | 8,251     | 1,588        | 5,814     | 6,297      | 8,251      | 10,639     | 11,403     |
| <b>122</b>    | 0,261         | 8,163     | 1,568        | 5,700     | 6,189      | 8,163      | 10,568     | 11,336     |
| <b>123</b>    | 0,286         | 8,075     | 1,549        | 5,587     | 6,081      | 8,075      | 10,496     | 11,267     |
| <b>124</b>    | 0,311         | 7,986     | 1,530        | 5,474     | 5,974      | 7,986      | 10,423     | 11,198     |
| <b>125</b>    | 0,335         | 7,897     | 1,510        | 5,361     | 5,866      | 7,897      | 10,350     | 11,127     |
| <b>126</b>    | 0,358         | 7,807     | 1,492        | 5,250     | 5,759      | 7,807      | 10,272     | 11,051     |
| <b>127</b>    | 0,380         | 7,716     | 1,476        | 5,142     | 5,656      | 7,716      | 10,186     | 10,965     |
| <b>128</b>    | 0,402         | 7,622     | 1,463        | 5,042     | 5,558      | 7,622      | 10,087     | 10,862     |
| <b>129</b>    | 0,423         | 7,527     | 1,456        | 4,953     | 5,468      | 7,527      | 9,973      | 10,740     |
| <b>130</b>    | 0,442         | 7,429     | 1,454        | 4,875     | 5,388      | 7,429      | 9,842      | 10,596     |
| <b>131</b>    | 0,459         | 7,330     | 1,457        | 4,809     | 5,317      | 7,330      | 9,695      | 10,431     |
| <b>132</b>    | 0,475         | 7,227     | 1,465        | 4,754     | 5,254      | 7,227      | 9,534      | 10,249     |



|     |        |       |       |       |       |       |       |        |
|-----|--------|-------|-------|-------|-------|-------|-------|--------|
| 133 | 0,489  | 7,122 | 1,478 | 4,705 | 5,195 | 7,122 | 9,361 | 10,052 |
| 134 | 0,501  | 7,014 | 1,492 | 4,658 | 5,137 | 7,014 | 9,181 | 9,848  |
| 135 | 0,513  | 6,902 | 1,507 | 4,610 | 5,077 | 6,902 | 8,998 | 9,641  |
| 136 | 0,522  | 6,786 | 1,520 | 4,556 | 5,012 | 6,786 | 8,814 | 9,435  |
| 137 | 0,531  | 6,667 | 1,532 | 4,497 | 4,942 | 6,667 | 8,631 | 9,232  |
| 138 | 0,537  | 6,544 | 1,542 | 4,430 | 4,864 | 6,544 | 8,452 | 9,033  |
| 139 | 0,542  | 6,418 | 1,548 | 4,355 | 4,780 | 6,418 | 8,275 | 8,840  |
| 140 | 0,546  | 6,290 | 1,552 | 4,273 | 4,688 | 6,290 | 8,102 | 8,654  |
| 141 | 0,547  | 6,159 | 1,552 | 4,184 | 4,590 | 6,159 | 7,933 | 8,473  |
| 142 | 0,546  | 6,026 | 1,549 | 4,089 | 4,487 | 6,026 | 7,768 | 8,298  |
| 143 | 0,543  | 5,893 | 1,543 | 3,990 | 4,381 | 5,893 | 7,607 | 8,129  |
| 144 | 0,538  | 5,760 | 1,536 | 3,890 | 4,274 | 5,760 | 7,450 | 7,965  |
| 145 | 0,530  | 5,629 | 1,528 | 3,789 | 4,166 | 5,629 | 7,297 | 7,807  |
| 146 | 0,519  | 5,500 | 1,518 | 3,689 | 4,059 | 5,500 | 7,149 | 7,654  |
| 147 | 0,506  | 5,372 | 1,507 | 3,590 | 3,953 | 5,372 | 7,005 | 7,507  |
| 148 | 0,489  | 5,246 | 1,494 | 3,492 | 3,848 | 5,246 | 6,866 | 7,365  |
| 149 | 0,470  | 5,122 | 1,482 | 3,395 | 3,744 | 5,122 | 6,729 | 7,227  |
| 150 | 0,448  | 5,000 | 1,469 | 3,302 | 3,644 | 5,000 | 6,595 | 7,092  |
| 151 | 0,423  | 4,880 | 1,457 | 3,213 | 3,547 | 4,880 | 6,463 | 6,959  |
| 152 | 0,395  | 4,763 | 1,446 | 3,129 | 3,454 | 4,763 | 6,333 | 6,829  |
| 153 | 0,363  | 4,649 | 1,437 | 3,049 | 3,366 | 4,649 | 6,207 | 6,701  |
| 154 | 0,330  | 4,539 | 1,427 | 2,974 | 3,282 | 4,539 | 6,084 | 6,579  |
| 155 | 0,293  | 4,434 | 1,419 | 2,904 | 3,203 | 4,434 | 5,966 | 6,461  |
| 156 | 0,255  | 4,333 | 1,411 | 2,838 | 3,129 | 4,333 | 5,853 | 6,349  |
| 157 | 0,214  | 4,237 | 1,405 | 2,778 | 3,059 | 4,237 | 5,745 | 6,241  |
| 158 | 0,172  | 4,146 | 1,400 | 2,723 | 2,995 | 4,146 | 5,639 | 6,135  |
| 159 | 0,129  | 4,059 | 1,398 | 2,673 | 2,937 | 4,059 | 5,536 | 6,032  |
| 160 | 0,085  | 3,977 | 1,398 | 2,630 | 2,885 | 3,977 | 5,435 | 5,929  |
| 161 | 0,040  | 3,900 | 1,402 | 2,593 | 2,840 | 3,900 | 5,335 | 5,827  |
| 162 | -0,005 | 3,828 | 1,410 | 2,563 | 2,800 | 3,828 | 5,236 | 5,723  |
| 163 | -0,051 | 3,760 | 1,421 | 2,538 | 2,766 | 3,760 | 5,137 | 5,617  |
| 164 | -0,097 | 3,695 | 1,436 | 2,516 | 2,736 | 3,695 | 5,035 | 5,506  |
| 165 | -0,143 | 3,630 | 1,454 | 2,498 | 2,708 | 3,630 | 4,930 | 5,390  |
| 166 | -0,190 | 3,567 | 1,476 | 2,481 | 2,682 | 3,567 | 4,821 | 5,268  |
| 167 | -0,236 | 3,504 | 1,501 | 2,465 | 2,658 | 3,504 | 4,711 | 5,143  |
| 168 | -0,282 | 3,441 | 1,528 | 2,449 | 2,633 | 3,441 | 4,598 | 5,014  |
| 169 | -0,329 | 3,378 | 1,557 | 2,433 | 2,608 | 3,378 | 4,483 | 4,881  |
| 170 | -0,375 | 3,315 | 1,589 | 2,416 | 2,583 | 3,315 | 4,366 | 4,746  |
| 171 | -0,422 | 3,251 | 1,623 | 2,398 | 2,556 | 3,251 | 4,247 | 4,608  |
| 172 | -0,468 | 3,186 | 1,659 | 2,379 | 2,529 | 3,186 | 4,127 | 4,469  |
| 173 | -0,515 | 3,119 | 1,697 | 2,357 | 2,499 | 3,119 | 4,006 | 4,328  |
| 174 | -0,562 | 3,052 | 1,736 | 2,333 | 2,468 | 3,052 | 3,885 | 4,187  |
| 175 | -0,609 | 2,984 | 1,777 | 2,308 | 2,434 | 2,984 | 3,765 | 4,047  |
| 176 | -0,655 | 2,916 | 1,819 | 2,281 | 2,400 | 2,916 | 3,645 | 3,909  |
| 177 | -0,702 | 2,848 | 1,863 | 2,251 | 2,364 | 2,848 | 3,528 | 3,773  |
| 178 | -0,749 | 2,779 | 1,906 | 2,221 | 2,326 | 2,779 | 3,413 | 3,641  |

|            |        |       |       |       |       |       |       |       |
|------------|--------|-------|-------|-------|-------|-------|-------|-------|
| <b>179</b> | -0,796 | 2,711 | 1,951 | 2,188 | 2,287 | 2,711 | 3,301 | 3,512 |
| <b>180</b> | -0,843 | 2,643 | 1,996 | 2,154 | 2,247 | 2,643 | 3,191 | 3,386 |
| <b>181</b> | -0,890 | 2,575 | 2,041 | 2,118 | 2,205 | 2,575 | 3,084 | 3,264 |
| <b>182</b> | -0,936 | 2,507 | 2,086 | 2,080 | 2,162 | 2,507 | 2,979 | 3,146 |
| <b>183</b> | -0,983 | 2,439 | 2,131 | 2,040 | 2,117 | 2,439 | 2,876 | 3,030 |

Table S16: Look up table for Ztot at 8 Hz for female children and adolescents. Height in cm; 5<sup>th</sup>, 10<sup>th</sup>, 50<sup>th</sup>, 90<sup>th</sup> and 95<sup>th</sup> percentile.

Table S17 shows the Pearson correlation coefficients between age, weight and height and all measured oscillometry parameters.

|               | <b>Mean</b> | <b>SD</b>   | Mean Pearson correlation coefficient for each oscillometry parameter |                |               |               |                |               |               |
|---------------|-------------|-------------|----------------------------------------------------------------------|----------------|---------------|---------------|----------------|---------------|---------------|
| <b>Age</b>    | <b>0.67</b> | <b>0.07</b> | 0.71                                                                 | 0.73           | 0.73          | 0.56          | 0.61           | 0.6           | 0.73          |
| <b>Weight</b> | <b>0.59</b> | <b>0.06</b> | 0.63                                                                 | 0.64           | 0.64          | 0.49          | 0.57           | 0.54          | 0.65          |
| <b>BMI</b>    | <b>0.36</b> | <b>0.04</b> | 0.38                                                                 | 0.39           | 0.39          | 0.29          | 0.37           | 0.33          | 0.39          |
| <b>Height</b> | <b>0.69</b> | <b>0.06</b> | 0.73                                                                 | 0.74           | 0.75          | 0.58          | 0.67           | 0.64          | 0.75          |
|               |             |             | <b>R8 exp</b>                                                        | <b>R8 insp</b> | <b>R8 tot</b> | <b>X8 exp</b> | <b>X8 insp</b> | <b>X8 tot</b> | <b>Z8 tot</b> |

Table S17: Pearson correlation coefficients between age, weight and height for all oscillometry parameters together and separated for Rexp, Rinsp, Rtot, Xinsp, Xexp, Xtot and Ztot.

Figure S2 shows the reference values of Ducharme et al. from 2022 for  $R_{tot}$  and  $X_{tot}$  at 8 Hz applied to the current LEAD cohort.

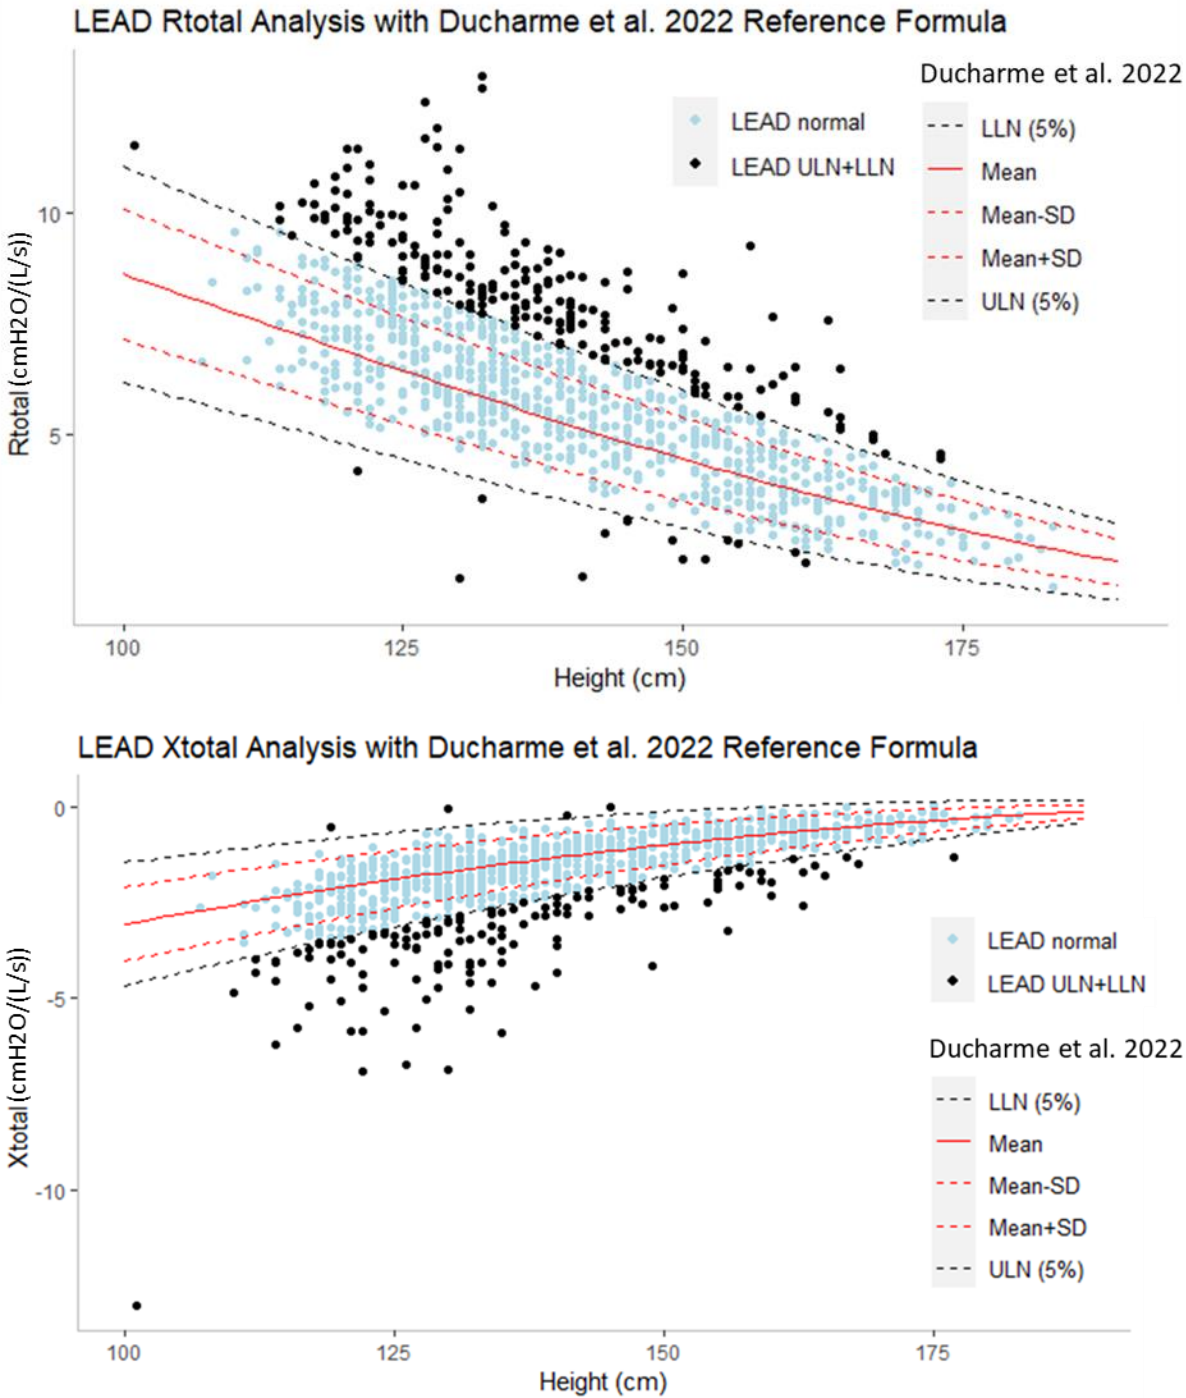

Figure S2: Application of the reference values of Ducharme et al. from 2022 for  $R_{tot}$  and  $X_{tot}$  at 8 Hz applied to the current LEAD cohort.

Figure S3 shows the sensitivity analysis with regard to high minute ventilation.

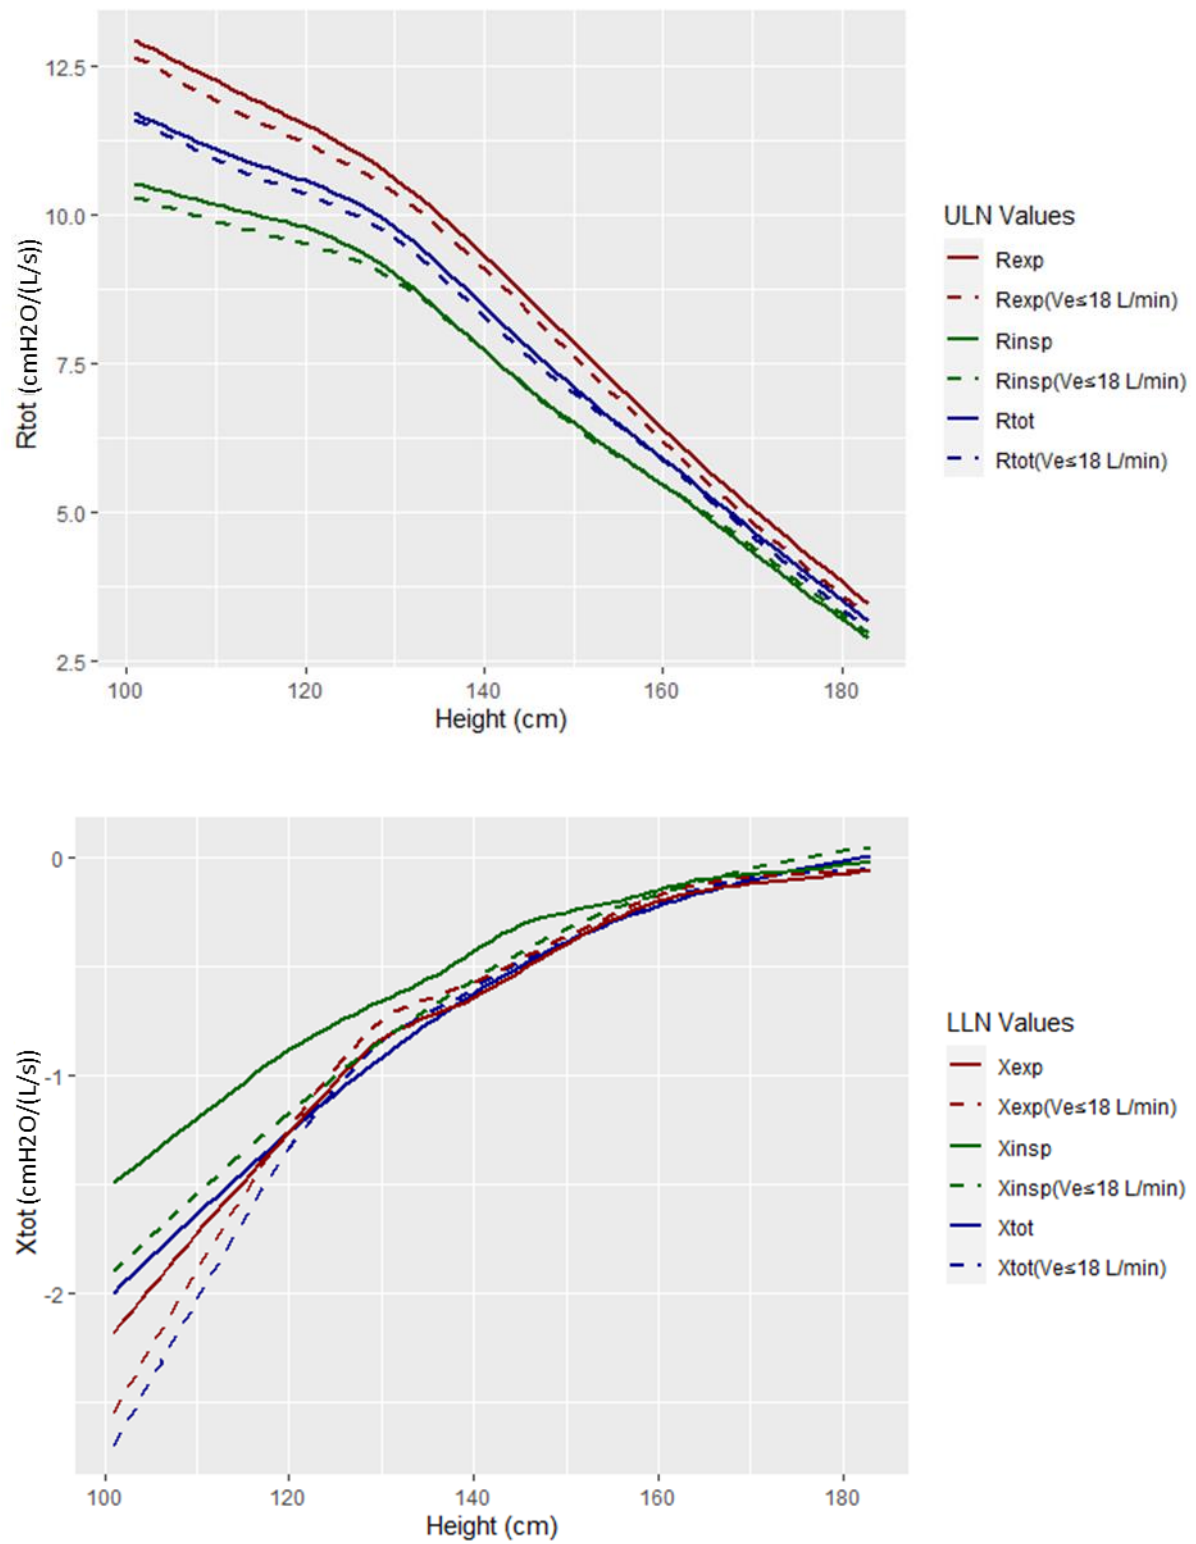

Figure S3: sensitivity analysis considering susceptibility to different levels of breathing flows

Figure S4a shows the sensitivity analysis with regard to residual artifacts not filtered by the device by applying a threshold on the intrabreath CoV of Xtot of 15%.

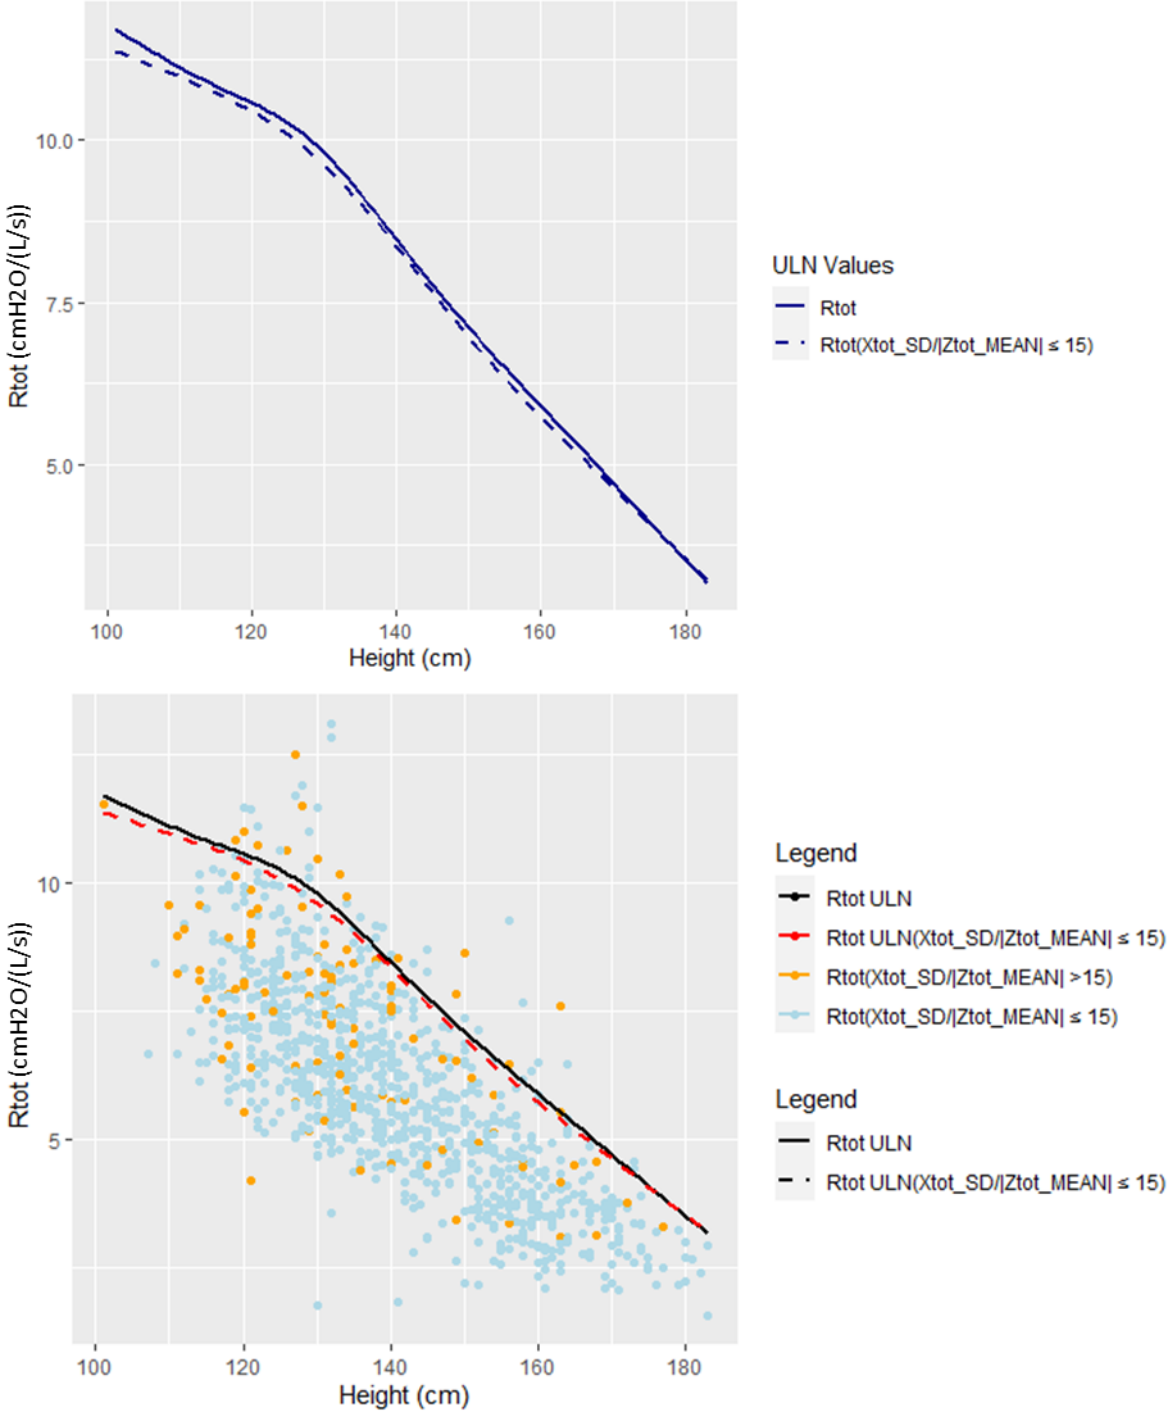

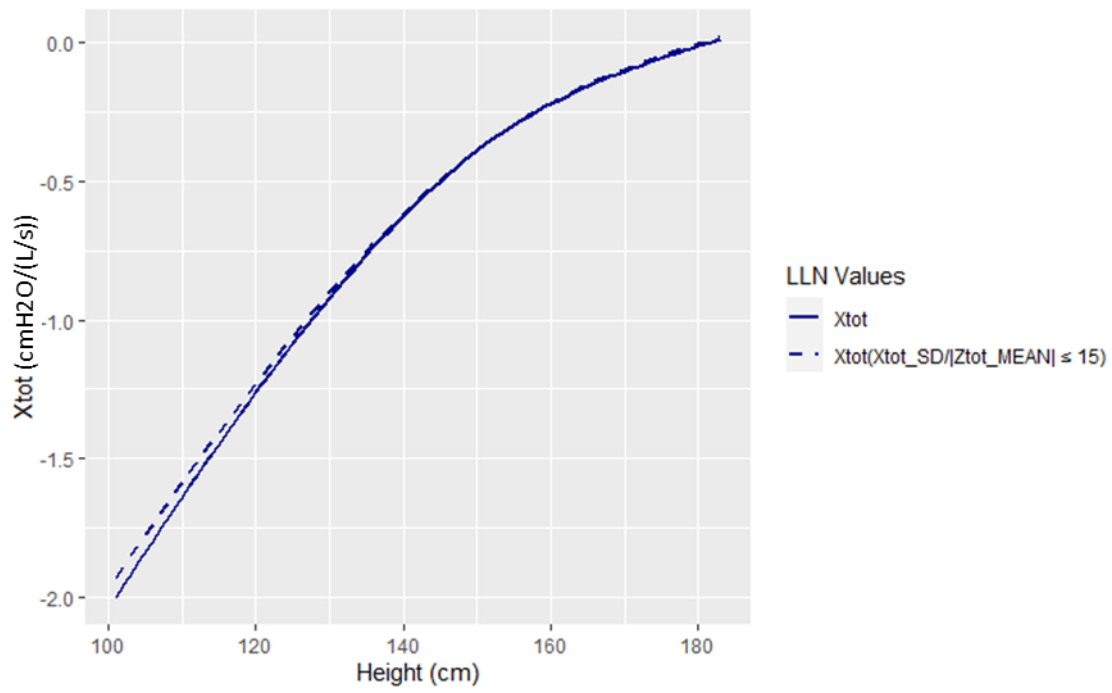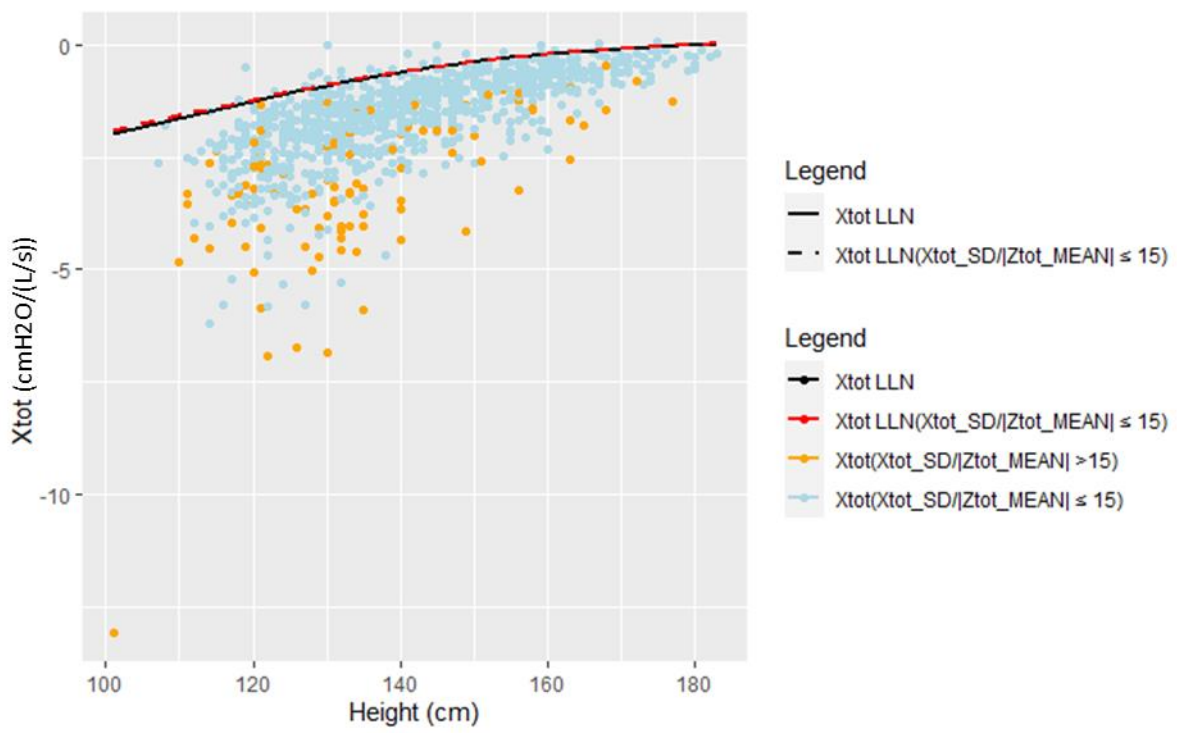

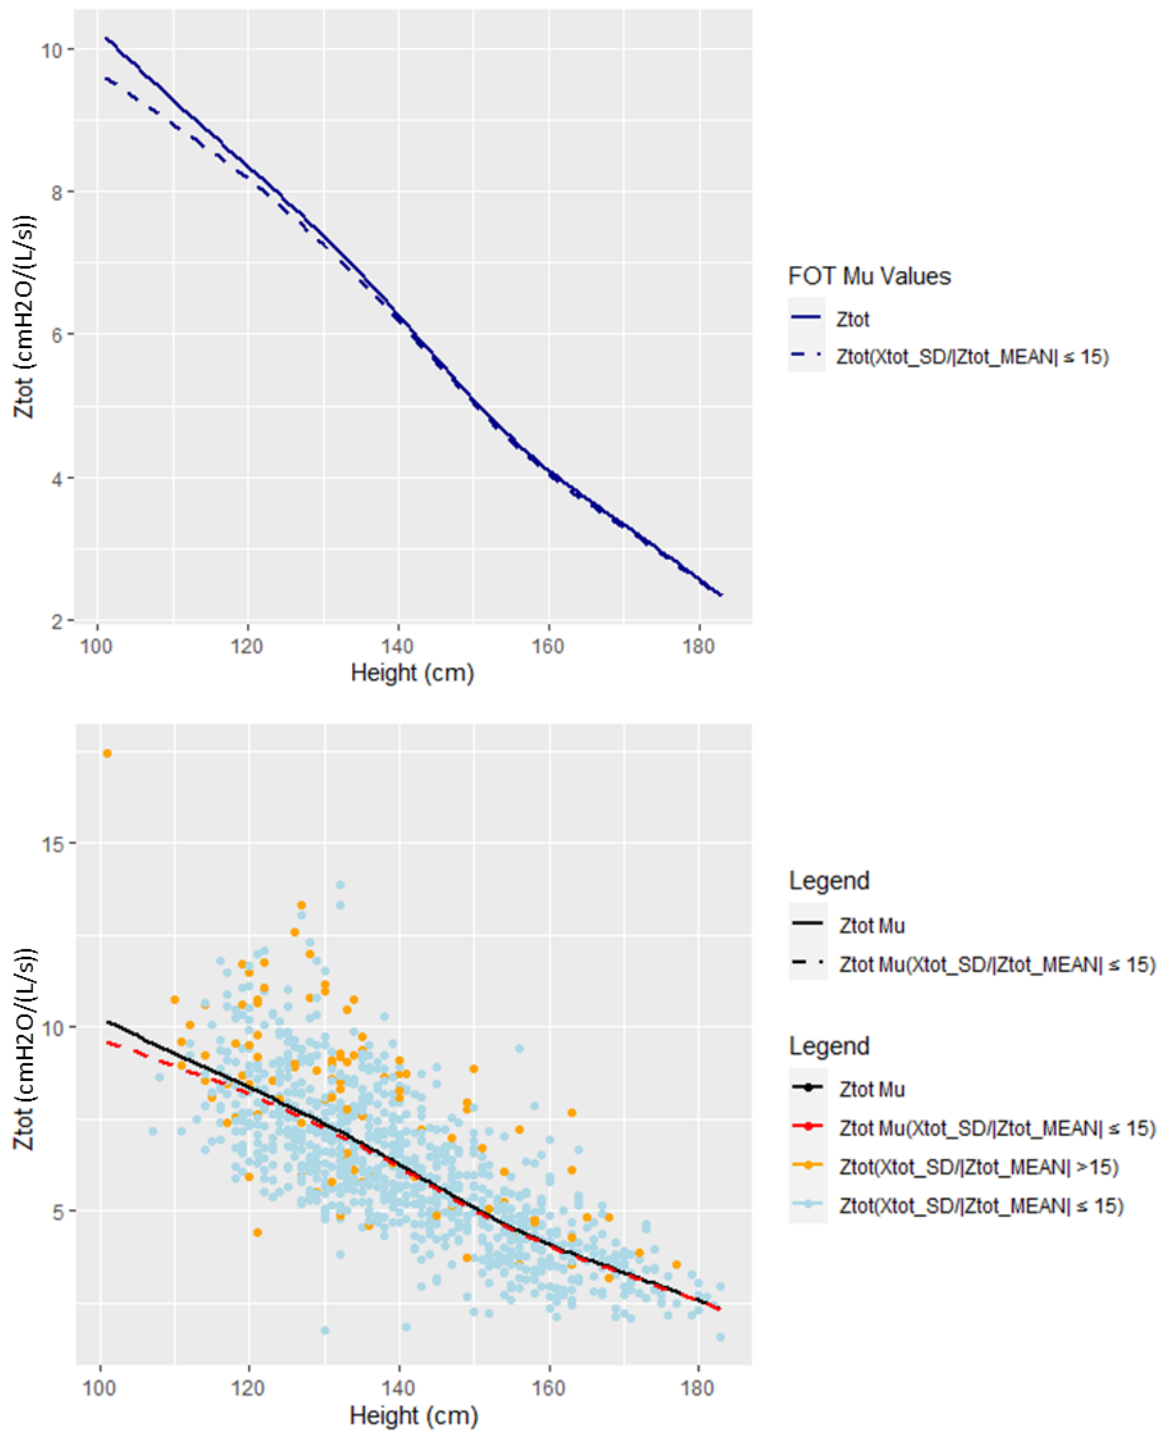

Figure S4a: sensitivity analysis considering susceptibility to artifacts not filtered by the device by applying a CoV of Xtot of 15%.

Figure S4b shows the sensitivity analysis with regard to residual artifacts not filtered by the device by applying a threshold on the intrabreath CoV of  $X_{tot}$  of 30%.

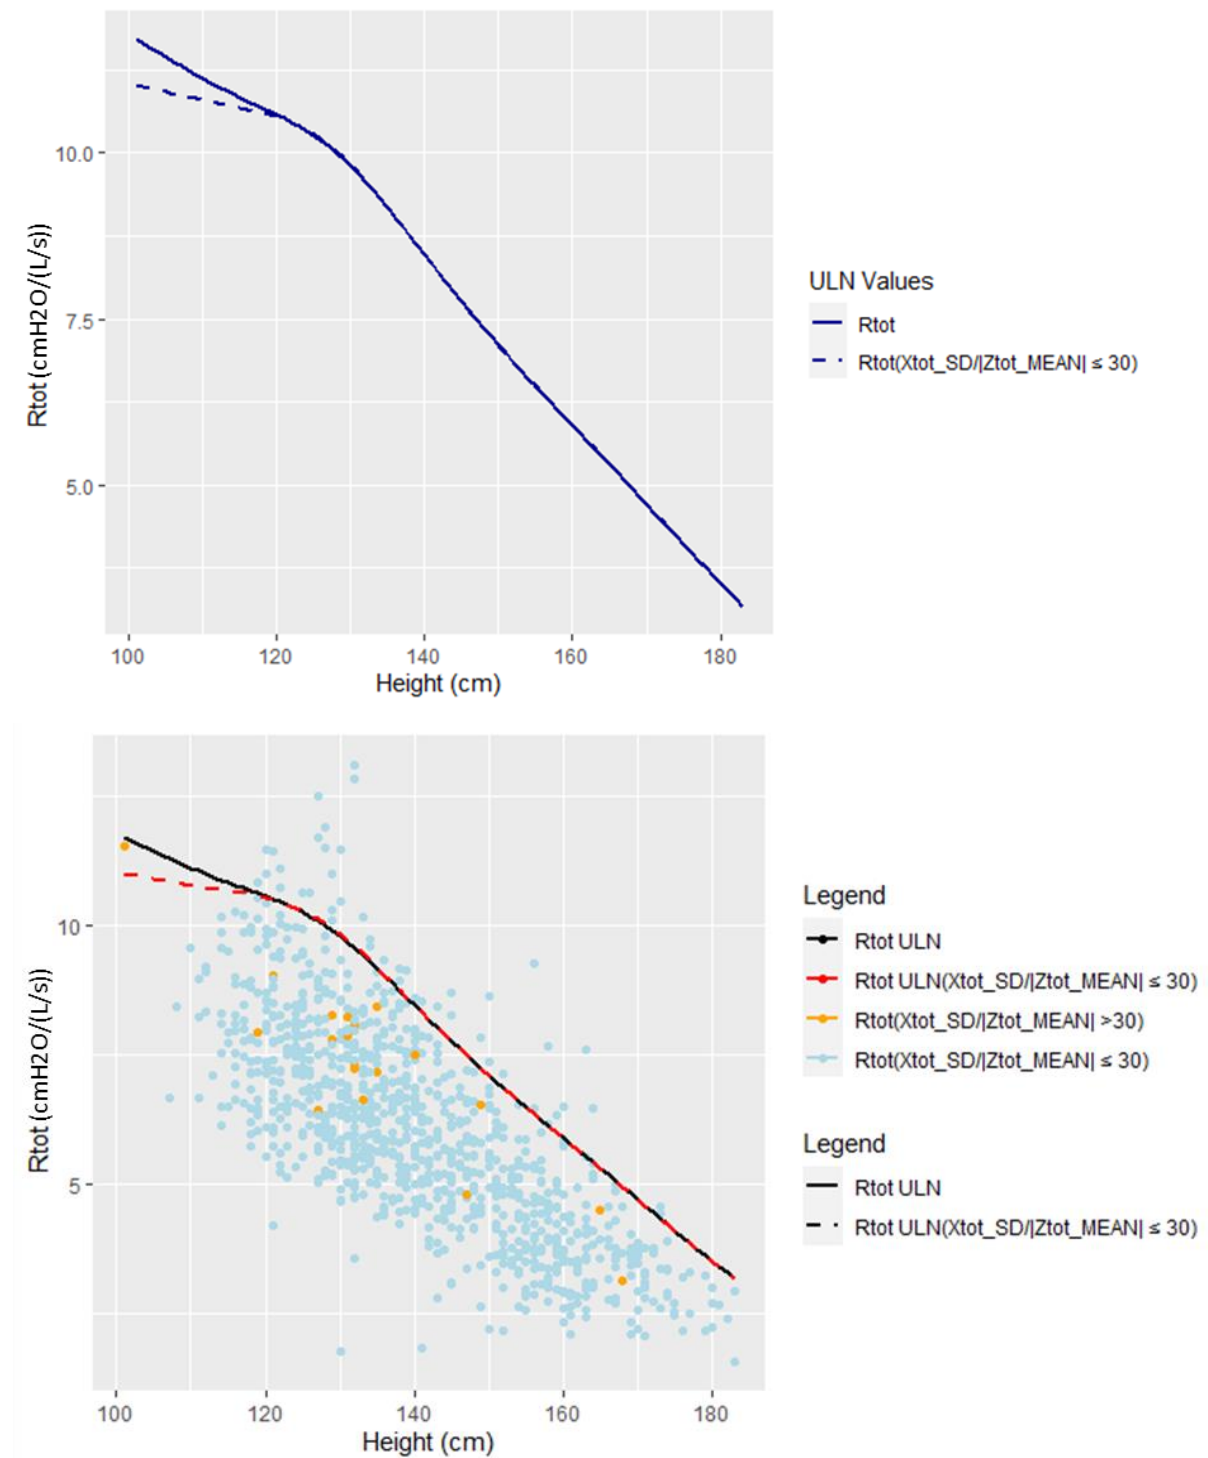



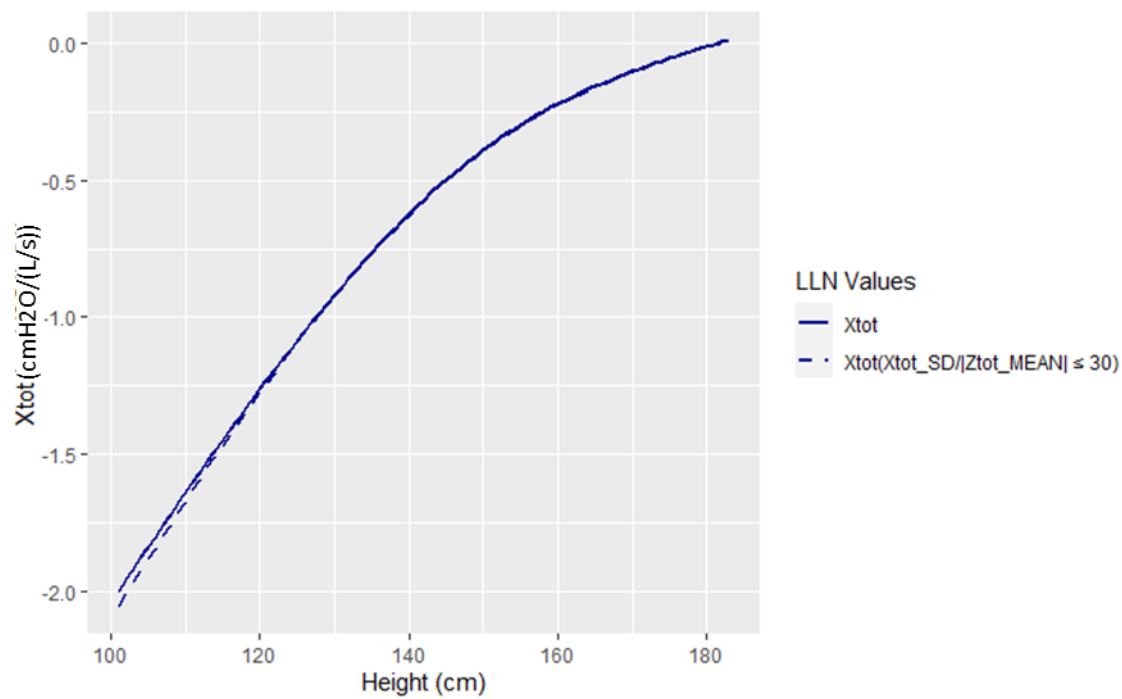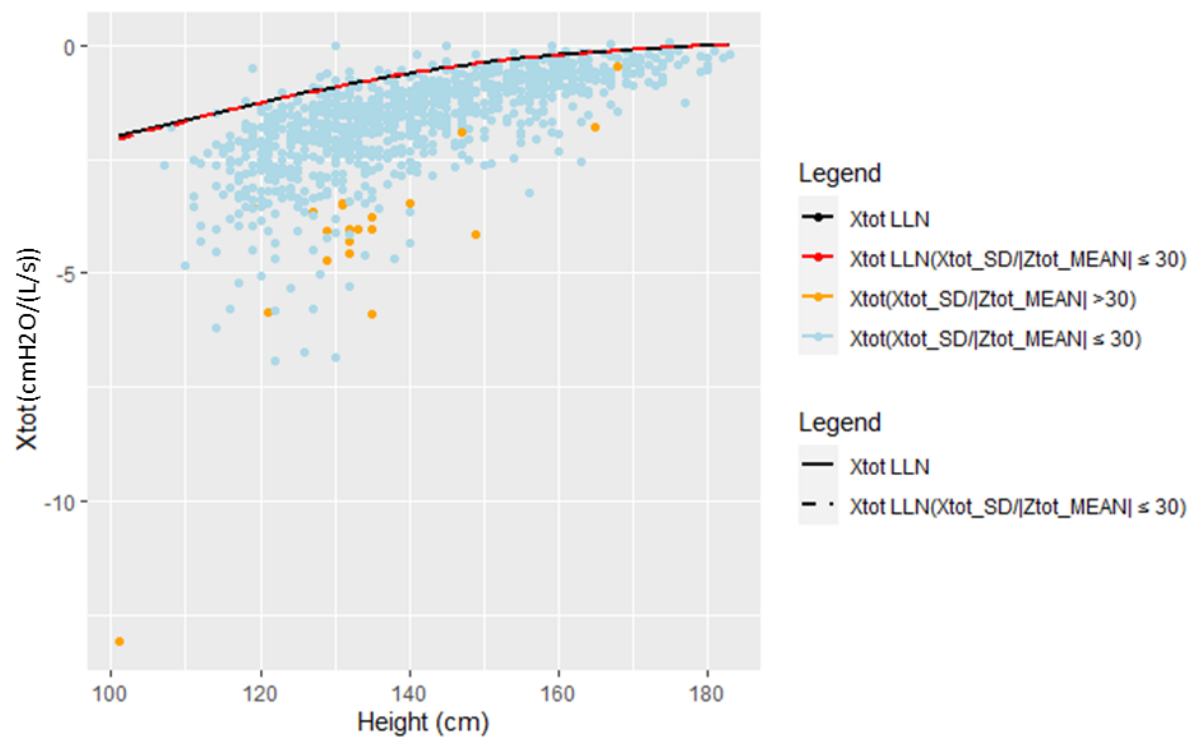

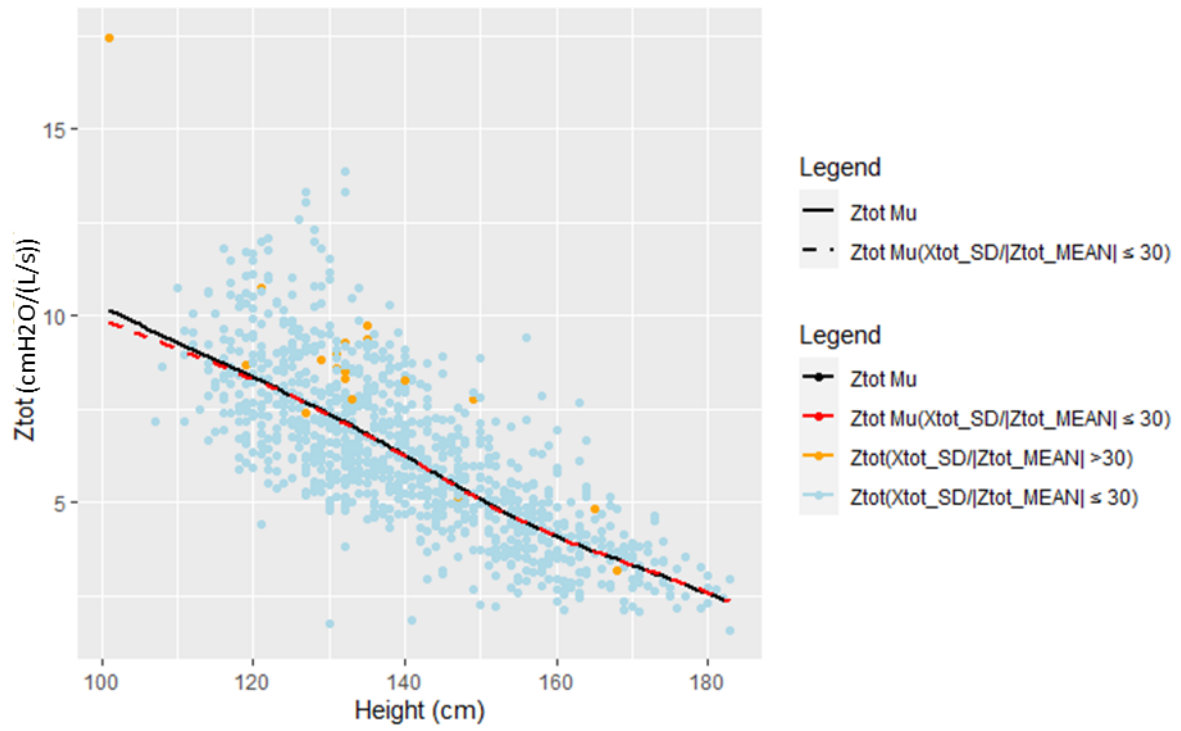

Figure S4b: sensitivity analysis considering susceptibility to artifacts not filtered by the device by applying a CoV of Xtot of 30%.
